# Supplementary material for: Organocatalytic allylic alkylation of alkyne-substituted MBH carbonates: access to quaternary carbon-containing 1,4-enynes
Source: Royal Society of Chemistry journal article supplement (doi:10.1039/d3ob01317k), 2023-01-01

# Supporting Information

## Organocatalytic Allylic Alkylation of Alkyne-Substituted MBH

### Carbonates: Access to Quaternary Carbon-Containing 1,4-Enynes

Yu Li,<sup>‡</sup> Mei Wang,<sup>‡</sup> Rongrong Ma, Rui Niu, Haodong Wang, Yantu Zhang and Jun-Bing Lin\*

Shaanxi Key Laboratory of Chemical Reaction Engineering, College of Chemistry and Chemical Engineering, Yan'an University, Yan'an 716000, China.

|                                                                  |     |
|------------------------------------------------------------------|-----|
| 1. General Information.....                                      | S2  |
| 2. General Procedure for the Synthesis of 1,4-Enyne Product..... | S2  |
| 3. Synthetic Elaboration of the Product.....                     | S12 |
| 4. X-ray Crystallographic Analysis.....                          | S14 |
| 5. Reference.....                                                | S16 |
| 6. Copies of NMR Spectra.....                                    | S16 |

## 1. General Information

All reactions were carried out in glassware with magnetic stirring. Unless otherwise noted, solvents were either purchased from commercial suppliers or purified by standard procedures. Purification of the reaction products was carried out by flash column chromatography at reduced pressure. Thin layer chromatography was performed using silica gel plates and visualized with ultraviolet light.  $^1\text{H}$  NMR spectra was recorded on JEOL 400MHz spectrometer and the chemical shifts were reported in ppm ( $\delta$ ) relative to internal standard TMS (0 ppm).  $^{13}\text{C}$  NMR spectra are recorded at 100 MHz and referenced to the central  $\text{CDCl}_3$  resonance (77.0 ppm). The results of mass spectrometry under ESI light source were recorded by Thermo Scientific Q Exactive instrument. MBH carbonates<sup>[1]</sup> were synthesized according to literature and the spectral data are consistent with those reported.

## 2. General Procedure for the Synthesis of 1,4-Enyne Product

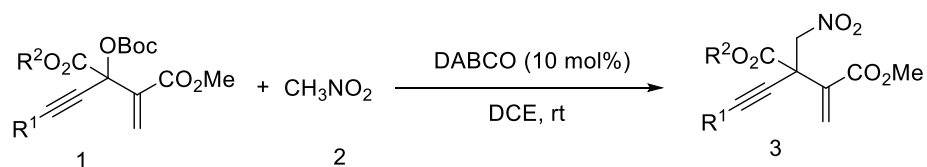

To the solution of MBH carbonate **1** (0.2 mmol) in DCE (1 mL), nitromethane **2** (0.6 mmol) and DABCO (0.02 mmol) were successively added under stirring. The reaction was stirred at room temperature and monitored by thin layer chromatography. Upon the completion of the reaction, the solvent was evaporated and the residue was purified by flash column chromatography to give 1,4-enyne product **3**.

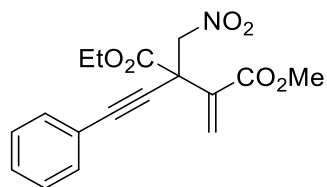

1-ethyl 4-methyl 3-methylene-2-(nitromethyl)-2-(phenylethynyl)succinate (**3a**).

White solid, 51.2 mg, 77% yield; mp 65-66 °C;

$^1\text{H}$  NMR (400 MHz,  $\text{CDCl}_3$ ):  $\delta$  7.48 (d,  $J = 6.4$  Hz, 2H), 7.35 (dd,  $J = 8.9, 7.1$  Hz, 3H), 6.66 (s, 1H), 6.50 (s, 1H), 5.26 (d,  $J = 11.4$  Hz, 1H), 5.16 (d,  $J = 11.0$  Hz, 1H), 4.29 (dd,  $J = 6.9, 5.5$  Hz, 2H), 3.83 (s, 3H), 1.26-1.28 (m, 3H);  $^{13}\text{C}$  NMR (100 MHz,  $\text{CDCl}_3$ ):  $\delta$

166.83, 165.27, 134.97, 132.10, 131.94, 129.24, 128.35, 121.30, 89.89, 81.83, 79.58, 63.12, 52.52, 50.53, 13.75 ppm;

ESI-HRMS calcd for C<sub>17</sub>H<sub>17</sub>NO<sub>6</sub> [M+H]<sup>+</sup>: 332.1128, found 332.1129.

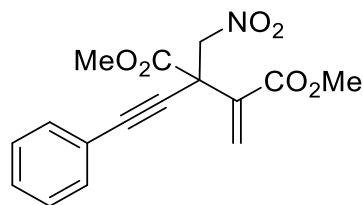

dimethyl 3-methylene-2-(nitromethyl)-2-(phenylethynyl)succinate (**3b**).

White solid, 46.9 mg, 74% yield; mp 113-114 °C;

<sup>1</sup>H NMR (400 MHz, CDCl<sub>3</sub>): δ 7.49 (d, J = 6.9 Hz, 2H), 7.35 (t, J = 8.5 Hz, 3H), 6.67 (s, 1H), 6.52 (s, 1H), 5.25 (d, J = 11.0 Hz, 1H), 5.16 (d, J = 11.4 Hz, 1H), 3.83 (d, J = 6.6 Hz, 6H);

<sup>13</sup>C NMR (100 MHz, CDCl<sub>3</sub>): δ 167.41, 165.23, 134.88, 132.17, 131.95, 129.28, 128.34, 121.16, 90.06, 81.53, 79.53, 53.99, 52.60, 50.33 ppm

ESI-HRMS calcd for C<sub>16</sub>H<sub>15</sub>NO<sub>6</sub> [M+H]<sup>+</sup>: 318.0972, found 318.0973.

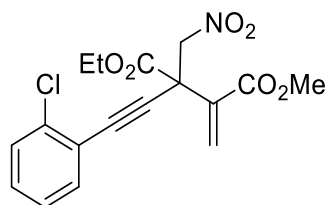

1-ethyl 4-methyl 2-((2-chlorophenyl)ethynyl)-3-methylene-2-(nitromethyl)succinate (**3c**).

White solid, 57.0 mg, 78% yield; mp 72-74 °C;

<sup>1</sup>H NMR (400 MHz, CDCl<sub>3</sub>): δ 7.52 (dd, J = 7.5, 1.6 Hz, 1H), 7.40-7.42 (m, 1H), 7.27 (dd, J = 27.4, 1.4 Hz, 2H), 6.68 (s, 1H), 6.63 (s, 1H), 5.28 (d, J = 11.4 Hz, 1H), 5.18 (d, J = 11.4 Hz, 1H), 4.29 (dd, J = 6.9, 1.4 Hz, 2H), 3.84 (s, 3H), 1.28 (t, J = 7.1 Hz, 3H)

<sup>13</sup>C NMR (100 MHz, CDCl<sub>3</sub>): δ 166.60, 165.21, 136.34, 134.61, 133.68, 132.46, 130.25, 129.30, 126.49, 121.38, 86.97, 86.31, 79.30, 63.19, 52.54, 50.70, 13.76 ppm;

ESI-HRMS calcd for C<sub>17</sub>H<sub>17</sub>ClNO<sub>6</sub> [M+H]<sup>+</sup>: 366.0739, found 366.0742.

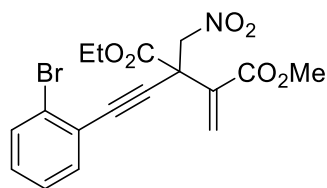

1-ethyl 4-methyl 2-((2-bromophenyl)ethynyl)-3-methylene-2-(nitromethyl)succinate (**3d**).

White solid, 51.0 mg, 64% yield; mp 70-71 °C;

<sup>1</sup>H NMR (400 MHz, CDCl<sub>3</sub>): δ 7.59 (dd, J = 8.0, 1.1 Hz, 1H), 7.51 (dd, J = 7.8, 1.8 Hz, 1H), 7.22-7.29 (m, 2H), 6.68 (s, 1H), 6.65 (s, 1H), 5.28 (d, J = 11.4 Hz, 1H), 5.18 (d, J = 11.4 Hz, 1H), 4.29 (dd, J = 7.1, 2.1 Hz, 2H), 3.84 (s, 3H), 1.28 (t, J = 7.3 Hz, 3H);

<sup>13</sup>C NMR (100 MHz, CDCl<sub>3</sub>): δ 166.56, 165.22, 134.58, 133.85, 132.55, 132.46, 130.39, 127.06, 125.70, 123.59, 87.96, 86.31, 79.27, 63.20, 52.54, 50.70, 13.81 ppm;

ESI-HRMS calcd for C<sub>17</sub>H<sub>17</sub>BrNO<sub>6</sub> [M+H]<sup>+</sup>: 410.0234, found 410.0237.

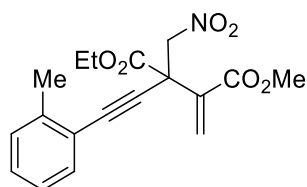

1-ethyl 4-methyl 3-methylene-2-(nitromethyl)-2-(o-tolyethynyl)succinate (**3e**).

White solid, 55.2 mg, 80% yield; mp 52-53 °C;

<sup>1</sup>H NMR (400 MHz, CDCl<sub>3</sub>): δ 7.44 (d, J = 7.3 Hz, 1H), 7.25-7.27 (m, 1H), 7.21 (d, J = 6.9 Hz, 1H), 7.16 (d, J = 7.8 Hz, 1H), 6.66 (s, 1H), 6.52 (s, 1H), 5.28 (d, J = 11.4 Hz, 1H), 5.17 (d, J = 11.0 Hz, 1H), 4.29 (q, J = 7.2 Hz, 2H), 3.84 (s, 3H), 2.43 (s, 3H), 1.28 (t, J = 7.1 Hz, 3H);

<sup>13</sup>C NMR (100 MHz, CDCl<sub>3</sub>): δ 166.93, 165.27, 140.72, 135.07, 132.31, 132.09, 129.53, 129.22, 125.57, 121.11, 88.68, 85.61, 79.58, 63.08, 52.53, 50.74, 20.58, 13.78 ppm;

ESI-HRMS calcd for C<sub>18</sub>H<sub>20</sub>NO<sub>6</sub> [M+H]<sup>+</sup>: 346.1285, found 346.1286.

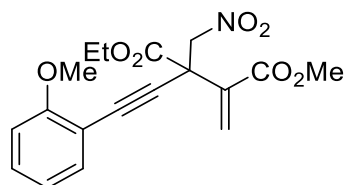

1-ethyl 4-methyl 2-((2-methoxyphenyl)ethynyl)-3-methylene-2-(nitromethyl)succinate (**3f**).

White solid, 54.5 mg, 75% yield; mp 124-125 °C;

$^1\text{H}$  NMR (400 MHz,  $\text{CDCl}_3$ ):  $\delta$  7.40 (d,  $J = 6.9$  Hz, 1H), 7.28-7.31 (m, 1H), 6.84-6.90 (m, 2H), 6.67 (d,  $J = 10.1$  Hz, 2H), 5.20 (dd,  $J = 35.0, 11.2$  Hz, 2H), 4.24-4.28 (m, 2H), 3.82 (d,  $J = 9.6$  Hz, 6H), 1.25 (t,  $J = 7.1$  Hz, 3H);

$^{13}\text{C}$  NMR (100 MHz,  $\text{CDCl}_3$ ):  $\delta$  167.08, 165.50, 160.75, 135.07, 133.61, 132.66, 130.74, 120.39, 110.78, 86.55, 85.76, 79.60, 63.11, 55.78, 52.58, 50.87, 13.86 ppm;

ESI-HRMS calcd for  $\text{C}_{18}\text{H}_{20}\text{NO}_7$   $[\text{M}+\text{H}]^+$ : 362.1234, found 362.1237.

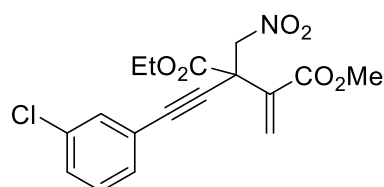

1-ethyl 4-methyl 2-((3-chlorophenyl)ethynyl)-3-methylene-2-(nitromethyl)succinate (**3g**).

White solid, 44.9 mg, 61% yield; mp 64-66 °C;

$^1\text{H}$  NMR (400 MHz,  $\text{CDCl}_3$ ):  $\delta$  7.47 (t,  $J = 1.6$  Hz, 1H), 7.34-7.38 (m, 2H), 7.27 (t,  $J = 7.8$  Hz, 1H), 6.66 (s, 1H), 6.46 (s, 1H), 5.26 (d,  $J = 11.0$  Hz, 1H), 5.15 (d,  $J = 11.4$  Hz, 1H), 4.29 (t,  $J = 7.3$  Hz, 2H), 3.83 (s, 3H), 1.28 (t,  $J = 7.1$  Hz, 3H)

$^{13}\text{C}$  NMR (100 MHz,  $\text{CDCl}_3$ ):  $\delta$  166.54, 165.12, 134.72, 134.20, 132.04, 131.71, 130.10, 129.63, 129.55, 122.89, 88.32, 83.07, 79.41, 63.23, 52.55, 50.46, 13.73 ppm;

ESI-HRMS calcd for  $\text{C}_{17}\text{H}_{17}\text{ClNO}_6$   $[\text{M}+\text{H}]^+$ : 366.0739, found 366.0740.

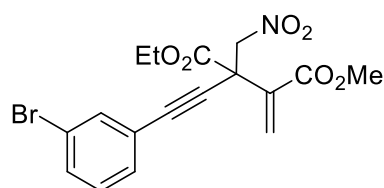

1-ethyl 4-methyl 2-((3-bromophenyl)ethynyl)-3-methylene-2-(nitromethyl)succinate (**3h**).

White solid, 32.9 mg, 40% yield; mp 44-45 °C;

$^1\text{H}$  NMR (400 MHz,  $\text{CDCl}_3$ ):  $\delta$  7.63 (t,  $J = 1.6$  Hz, 1H), 7.50-7.52 (m, 1H), 7.42 (d,  $J = 7.8$  Hz, 1H), 7.21 (t,  $J = 7.8$  Hz, 1H), 6.65 (s, 1H), 6.45 (s, 1H), 5.26 (d,  $J = 11.4$  Hz, 1H), 5.14 (d,  $J = 11.0$  Hz, 1H), 4.30 (q,  $J = 7.2$  Hz, 2H), 3.84 (s, 3H), 1.28 (t,  $J = 7.1$  Hz, 3H)

$^{13}\text{C}$  NMR (100 MHz,  $\text{CDCl}_3$ ):  $\delta$  166.56, 165.14, 134.72, 134.57, 132.46, 132.08, 130.56, 129.83, 123.20, 122.14, 88.20, 83.19, 79.42, 63.26, 52.58, 50.47, 13.76 ppm;

ESI-HRMS calcd for  $\text{C}_{17}\text{H}_{17}\text{BrNO}_6$   $[\text{M}+\text{H}]^+$ : 410.0234, found 410.0235.

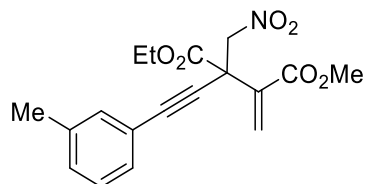

1-ethyl 4-methyl 3-methylene-2-(nitromethyl)-2-(m-tolylethynyl)succinate (**3i**).

White solid, 49.4 mg, 72% yield; mp 74-75 °C;

$^1\text{H}$  NMR (400 MHz,  $\text{CDCl}_3$ ):  $\delta$  7.26-7.30 (m, 2H), 7.19-7.24 (m, 2H), 6.65 (s, 1H), 6.50 (s, 1H), 5.26 (d,  $J = 11.0$  Hz, 1H), 5.15 (d,  $J = 11.0$  Hz, 1H), 4.28 (dd,  $J = 7.1, 6.2$  Hz, 2H), 3.83 (s, 3H), 2.34 (s, 3H), 1.28 (t,  $J = 7.1$  Hz, 3H)

$^{13}\text{C}$  NMR (100 MHz,  $\text{CDCl}_3$ ):  $\delta$  166.85, 165.27, 138.11, 134.97, 132.46, 132.12, 130.11, 128.99, 128.23, 121.06, 90.09, 81.38, 79.58, 63.10, 52.51, 50.50, 21.13, 13.75 ppm.

ESI-HRMS calcd for  $\text{C}_{18}\text{H}_{20}\text{NO}_6$   $[\text{M}+\text{H}]^+$ : 346.1285, found 346.1288.

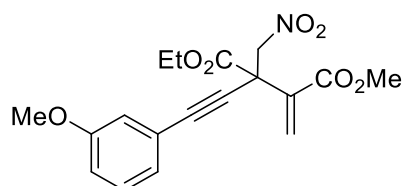

1-ethyl 4-methyl 2-((3-methoxyphenyl)ethynyl)-3-methylene-2-(nitromethyl)succinate (**3j**).

White solid, 47.7 mg, 59% yield; mp 86-87 °C;

$^1\text{H}$  NMR (400 MHz,  $\text{CDCl}_3$ ):  $\delta$  7.22-7.27 (m, 1H), 7.07-7.09 (m, 1H), 6.99 (q,  $J = 1.4$  Hz, 1H), 6.92 (dt,  $J = 7.3, 1.3$  Hz, 1H), 6.66 (s, 1H), 6.50 (s, 1H), 5.26 (d,  $J = 11.0$  Hz, 1H), 5.16 (d,  $J = 11.4$  Hz, 1H), 4.30 (q,  $J = 6.9$  Hz, 2H), 3.82 (d,  $J = 9.6$  Hz, 6H), 1.28 (t,  $J = 7.1$  Hz, 3H)

$^{13}\text{C}$  NMR (100 MHz,  $\text{CDCl}_3$ ):  $\delta$  166.77, 165.22, 159.24, 134.90, 132.10, 129.44, 124.43, 122.20, 116.62, 115.82, 89.76, 81.58, 79.52, 63.12, 55.29, 52.51, 50.48, 13.73 ppm;

ESI-HRMS calcd for  $\text{C}_{18}\text{H}_{20}\text{NO}_7$   $[\text{M}+\text{H}]^+$ : 362.1234, found 362.1235.

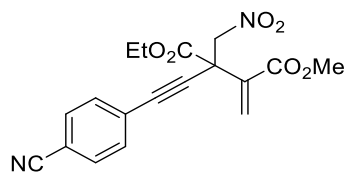

1-ethyl 4-methyl 2-((4-cyanophenyl)ethynyl)-3-methylene-2-(nitromethyl)succinate  
(**3k**).

White solid, 40.0 mg, 56% yield; mp 119-120 °C;

<sup>1</sup>H NMR (400 MHz, CDCl<sub>3</sub>): δ 7.65 (dd, J = 6.6, 2.1 Hz, 2H), 7.57-7.59 (m, 2H), 6.66 (s, 1H), 6.42 (s, 1H), 5.27 (d, J = 11.4 Hz, 1H), 5.15 (d, J = 11.4 Hz, 1H), 4.28-4.33 (m, 2H), 3.84 (s, 3H), 1.28 (q, J = 6.9 Hz, 3H);

<sup>13</sup>C NMR (100 MHz, CDCl<sub>3</sub>): δ 166.30, 165.01, 134.52, 132.51, 132.06, 132.00, 126.03, 118.12, 112.71, 87.91, 86.16, 79.31, 63.39, 52.65, 50.54, 13.74 ppm;

ESI-HRMS calcd for C<sub>18</sub>H<sub>17</sub>N<sub>2</sub>O<sub>6</sub> [M+H]<sup>+</sup>: 357.1081, found 357.1081.

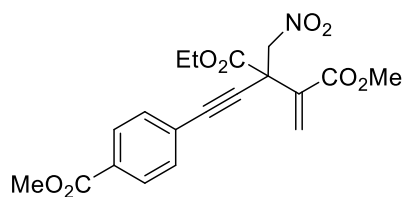

1-ethyl 4-methyl 2-((4-(methoxycarbonyl)phenyl)ethynyl)-3-methylene-2-(nitromethyl)succinate (**3l**).

White solid, 38.9 mg, 50% yield; mp 81-82 °C;

<sup>1</sup>H NMR (400 MHz, CDCl<sub>3</sub>): δ 8.01 (d, J = 8.2 Hz, 2H), 7.55 (d, J = 8.2 Hz, 2H), 6.67 (s, 1H), 6.47 (s, 1H), 5.27 (d, J = 11.4 Hz, 1H), 5.17 (d, J = 11.4 Hz, 1H), 4.28-4.33 (m, 2H), 3.93 (s, 3H), 3.84 (s, 3H), 1.29 (t, J = 7.1 Hz, 3H);

<sup>13</sup>C NMR (100 MHz, CDCl<sub>3</sub>): δ 166.50, 166.25, 165.10, 134.66, 132.09, 131.89, 130.44, 129.46, 125.79, 88.89, 84.63, 79.39, 63.27, 52.58, 52.31, 50.53, 13.74 ppm;

ESI-HRMS calcd for C<sub>19</sub>H<sub>20</sub>NO<sub>8</sub> [M+H]<sup>+</sup>: 390.1183, found 390.1184.

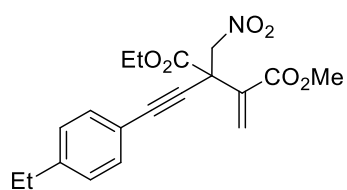

1-ethyl 4-methyl 2-((4-ethylphenyl)ethynyl)-3-methylene-2-(nitromethyl)succinate  
(**3m**).

white solid, 43.2 mg, 60% yield; mp 54-55 °C;

<sup>1</sup>H NMR (400 MHz, CDCl<sub>3</sub>) δ 7.39-7.41 (m, 2H), 7.16 (d, J = 8.2 Hz, 2H), 6.65 (s, 1H), 6.50 (s, 1H), 5.25 (d, J = 11.4 Hz, 1H), 5.15 (d, J = 11.4 Hz, 1H), 4.25-4.32 (m, 2H), 3.83 (s, 3H), 2.65 (q, J = 7.6 Hz, 2H), 1.25 (td, J = 14.5, 7.0 Hz, 3H)

<sup>13</sup>C NMR (101 MHz, CDCl<sub>3</sub>) δ 166.91, 165.30, 145.80, 135.01, 132.14, 131.93, 127.91, 118.44, 90.13, 81.09, 79.62, 63.08, 52.51, 50.53, 28.84, 15.36, 13.76 ppm

ESI-HRMS calcd for C<sub>19</sub>H<sub>22</sub>NO<sub>6</sub> [M+H]<sup>+</sup>: 360.1441, found 360.1441.

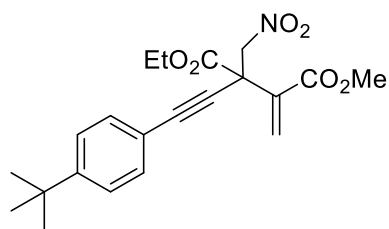

1-ethyl                      4-methyl                      2-((4-(tert-butyl)phenyl)ethynyl)-3-methylene-2-(nitromethyl)succinate (**3n**).

White solid, 49.9 mg, 64% yield;

<sup>1</sup>H NMR (400 MHz, CDCl<sub>3</sub>): δ 7.40-7.42 (m, 2H), 7.33-7.35 (m, 2H), 6.64 (s, 1H), 6.49 (s, 1H), 5.24 (d, J = 11.0 Hz, 1H), 5.14 (d, J = 11.0 Hz, 1H), 4.27 (dd, J = 7.3, 5.0 Hz, 2H), 3.82 (s, 3H), 1.25-1.29 (m, 12H);

<sup>13</sup>C NMR (100 MHz, CDCl<sub>3</sub>): δ 166.89, 165.28, 152.61, 134.99, 132.11, 131.67, 125.34, 118.23, 90.05, 81.13, 79.61, 63.06, 52.50, 50.51, 34.82, 31.07, 13.75 ppm;

ESI-HRMS calcd for C<sub>21</sub>H<sub>26</sub>NO<sub>6</sub> [M+H]<sup>+</sup>: 388.1755, found 388.1754

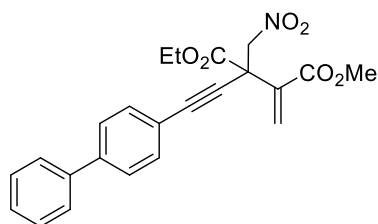

1-ethyl                      4-methyl                      2-([1,1'-biphenyl]-4-ylethynyl)-3-methylene-2-(nitromethyl)succinate (**3o**).

White solid, 46.0 mg, 56% yield;

<sup>1</sup>H NMR (400 MHz, CDCl<sub>3</sub>): δ 7.54-7.60 (m, 6H), 7.43-7.47 (m, 2H), 7.37-7.39 (m, 1H), 6.67 (s, 1H), 6.52 (s, 1H), 5.28 (d, J = 11.0 Hz, 1H), 5.18 (d, J = 11.0 Hz, 1H), 4.30 (dd, J = 7.1, 6.2 Hz, 2H), 3.84 (s, 3H), 1.29 (t, J = 7.1 Hz, 3H);



$^{13}\text{C}$  NMR (100 MHz,  $\text{CDCl}_3$ ):  $\delta$  166.91, 165.36, 142.10, 140.15, 135.04, 132.47, 132.25, 128.98, 127.92, 127.14, 120.20, 89.89, 82.49, 79.69, 63.26, 52.65, 50.69, 13.88 ppm;  
ESI-HRMS calcd for  $\text{C}_{23}\text{H}_{22}\text{NO}_6$   $[\text{M}+\text{H}]^+$ : 408.1442, found 408.1442.

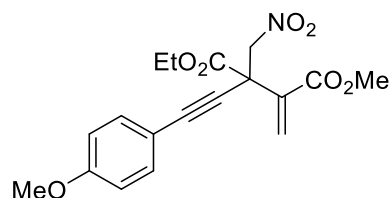

1-ethyl 4-methyl 2-((4-methoxyphenyl)ethynyl)-3-methylene-2-(nitromethyl)succinate (**3p**).

White solid, 53.3 mg, 74% yield; mp 72-73 °C;

$^1\text{H}$  NMR (400 MHz,  $\text{CDCl}_3$ ):  $\delta$  7.40-7.43 (m, 2H), 6.84-6.87 (m, 2H), 6.65 (s, 1H), 6.50 (s, 1H), 5.25 (d,  $J = 11.0$  Hz, 1H), 5.15 (d,  $J = 11.0$  Hz, 1H), 4.26-4.31 (m, 2H), 3.82 (d,  $J = 4.6$  Hz, 6H), 1.28 (t,  $J = 7.1$  Hz, 3H);

$^{13}\text{C}$  NMR (100 MHz,  $\text{CDCl}_3$ ):  $\delta$  166.95, 165.30, 160.24, 135.09, 133.44, 132.09, 113.93, 113.30, 89.98, 80.41, 79.66, 63.04, 55.29, 52.48, 50.54, 13.74 ppm;

ESI-HRMS calcd for  $\text{C}_{18}\text{H}_{20}\text{NO}_7$   $[\text{M}+\text{H}]^+$ : 362.1234, found 362.1237.

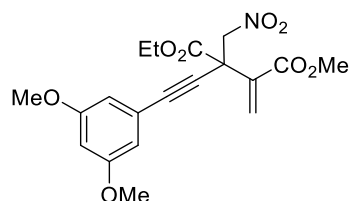

1-ethyl 4-methyl 2-((3,5-dimethoxyphenyl)ethynyl)-3-methylene-2-(nitromethyl)succinate (**3q**).

White solid, 67.1 mg, 86% yield; mp 76-78 °C;

$^1\text{H}$  NMR (400 MHz,  $\text{CDCl}_3$ ):  $\delta$  6.67 (s, 1H), 6.64 (d,  $J = 2.3$  Hz, 2H), 6.50 (t,  $J = 2.7$  Hz, 2H), 5.27 (d,  $J = 11.4$  Hz, 1H), 5.17 (d,  $J = 11.4$  Hz, 1H), 4.31 (t,  $J = 7.1$  Hz, 2H), 3.85 (s, 3H), 3.80 (s, 6H), 1.30 (t,  $J = 7.1$  Hz, 3H);

$^{13}\text{C}$  NMR (100 MHz,  $\text{CDCl}_3$ ):  $\delta$  166.76, 165.22, 160.48, 134.87, 132.14, 122.50, 109.64, 102.56, 89.82, 81.30, 79.49, 63.15, 55.44, 52.53, 50.47, 13.75 ppm;

ESI-HRMS calcd for  $\text{C}_{19}\text{H}_{22}\text{NO}_8$   $[\text{M}+\text{H}]^+$ : 392.1340, found 392.1340.

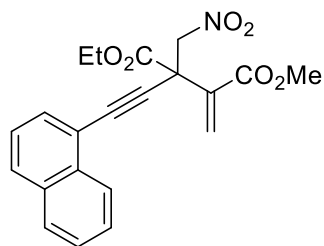

1-ethyl 4-methyl 3-methylene-2-(naphthalen-1-ylethynyl)-2-(nitromethyl)succinate  
(**3r**).

White solid, 34.0 mg, 45% yield; mp 79-80 °C;

$^1\text{H}$  NMR (400 MHz,  $\text{CDCl}_3$ ):  $\delta$  8.26 (d,  $J = 8.2$  Hz, 1H), 7.86 (t,  $J = 7.1$  Hz, 2H), 7.71-7.73 (m, 1H), 7.51-7.61 (m, 2H), 7.43 (dd,  $J = 8.2, 7.3$  Hz, 1H), 6.69 (s, 1H), 6.60 (s, 1H), 5.34 (d,  $J = 11.0$  Hz, 1H), 5.26 (d,  $J = 11.0$  Hz, 1H), 4.33 (q,  $J = 7.2$  Hz, 2H), 3.85 (s, 3H), 1.31 (t,  $J = 7.1$  Hz, 3H);

$^{13}\text{C}$  NMR (100 MHz,  $\text{CDCl}_3$ ):  $\delta$  166.90, 165.26, 135.02, 133.25, 132.99, 132.28, 131.29, 129.75, 128.32, 127.20, 126.57, 125.76, 125.03, 118.86, 87.95, 86.55, 79.59, 63.19, 52.57, 50.90, 13.83 ppm;

ESI-HRMS calcd for  $\text{C}_{21}\text{H}_{20}\text{NO}_6$   $[\text{M}+\text{H}]^+$ : 382.1285, found 382.1286.

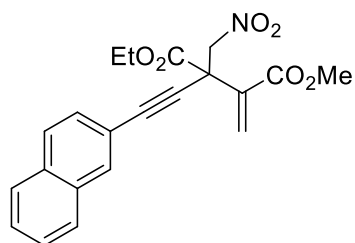

1-ethyl 4-methyl 3-methylene-2-(naphthalen-2-ylethynyl)-2-(nitromethyl)succinate  
(**3s**).

White solid, 16.5 mg, 22% yield; mp 79-80 °C;

$^1\text{H}$  NMR (400 MHz,  $\text{CDCl}_3$ ):  $\delta$  8.02 (s, 1H), 7.79-7.84 (m, 3H), 7.49-7.52 (m, 3H), 6.69 (s, 1H), 6.56 (s, 1H), 5.30 (d,  $J = 11.0$  Hz, 1H), 5.21 (d,  $J = 11.4$  Hz, 1H), 4.29-4.33 (m, 2H), 3.85 (s, 3H), 1.30 (t,  $J = 7.1$  Hz, 3H);

$^{13}\text{C}$  NMR (100 MHz,  $\text{CDCl}_3$ ):  $\delta$  166.84, 165.28, 134.96, 133.15, 132.69, 132.25, 132.22, 128.16, 128.10, 127.83, 127.78, 127.14, 126.73, 118.49, 90.26, 82.00, 79.63, 77.20, 63.19, 52.56, 50.62, 13.80 ppm;

ESI-HRMS calcd for  $\text{C}_{21}\text{H}_{20}\text{NO}_6$   $[\text{M}+\text{H}]^+$ : 382.1285, found 382.1286.

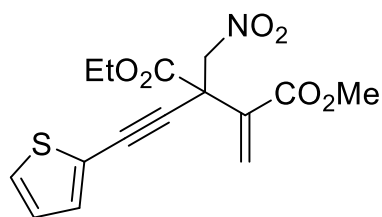

1-ethyl 4-methyl 3-methylene-2-(nitromethyl)-2-(thiophen-2-ylethynyl)succinate (**3t**).

White solid, 58.6 mg, 85% yield; mp 44-45 °C;

<sup>1</sup>H NMR (400 MHz, CDCl<sub>3</sub>): δ 7.32 (q, J = 4.6 Hz, 2H), 7.00 (dd, J = 5.0, 3.7 Hz, 1H), 6.66 (s, 1H), 6.46 (s, 1H), 5.26 (d, J = 11.0 Hz, 1H), 5.15 (d, J = 11.4 Hz, 1H), 4.30 (q, J = 7.0 Hz, 2H), 3.84 (s, 3H), 1.29 (t, J = 7.1 Hz, 4H);

<sup>13</sup>C NMR (100 MHz, CDCl<sub>3</sub>): δ 166.54, 165.15, 134.69, 133.40, 132.17, 128.28, 127.03, 120.93, 85.55, 83.17, 79.32, 63.20, 52.54, 50.73, 13.73 ppm;

ESI-HRMS calcd for C<sub>15</sub>H<sub>16</sub>NO<sub>6</sub>S [M+H]<sup>+</sup>: 338.0693, found 338.0693.

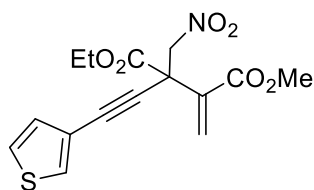

1-ethyl 4-methyl 3-methylene-2-(nitromethyl)-2-(thiophen-3-ylethynyl)succinate (**3u**).

White solid, 31.7 mg, 47% yield; mp 48-49 °C;

<sup>1</sup>H NMR (400 MHz, CDCl<sub>3</sub>): δ 7.54 (q, J = 1.4 Hz, 1H), 7.29 (q, J = 2.6 Hz, 1H), 7.14 (dd, J = 5.0, 1.4 Hz, 1H), 6.65 (s, 1H), 6.48 (s, 1H), 5.25 (d, J = 11.0 Hz, 1H), 5.14 (d, J = 11.0 Hz, 1H), 4.28 (dd, J = 9.6, 6.9 Hz, 2H), 3.83 (s, 3H), 1.28 (t, J = 7.3 Hz, 3H);

<sup>13</sup>C NMR (100 MHz, CDCl<sub>3</sub>): δ 166.77, 165.23, 134.89, 132.13, 130.34, 129.82, 125.60, 120.29, 85.12, 81.45, 79.51, 63.14, 52.54, 50.55, 13.75 ppm;

ESI-NRMS calcd for C<sub>15</sub>H<sub>16</sub>NO<sub>6</sub>S [M+H]<sup>+</sup>: 338.0693, found 338.0694.

### 3. Synthetic Elaboration of the Product

Synthesis of product **4**

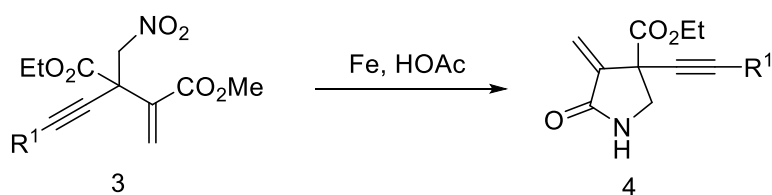

To the solution of 1,4-enyne compound **3** (0.2 mmol) in acetic acid (1.0 mL), iron

powder (0.04 mmol) was added under stirring. The reaction mixture was stirred at 90 °C for several hours and monitored by TLC analysis. Upon the completion of the reaction, 2-pyrrolidinone **4** was obtained by flash column chromatography.

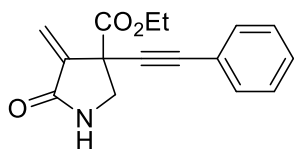

ethyl 4-methylene-5-oxo-3-(phenylethynyl)pyrrolidine-3-carboxylate (**4a**)

White solid, 17.8 mg, 33% yield; m.p. 123-125 °C;

<sup>1</sup>H NMR (400 MHz, CDCl<sub>3</sub>): δ 7.53 (s, 1H), 7.43-7.45 (m, 2H), 7.32-7.34 (m, 3H), 6.30 (s, 1H), 6.01 (s, 1H), 4.25-4.30 (m, 3H), 3.72 (d, J = 9.6 Hz, 1H), 1.31 (t, J = 7.2 Hz, 3H);

<sup>13</sup>C NMR (100 MHz, CDCl<sub>3</sub>): δ 168.76, 168.15, 140.82, 131.77, 128.68, 128.29, 122.07, 120.82, 86.49, 83.75, 62.91, 50.05, 47.72, 13.88 ppm;

ESI-HRMS calcd for C<sub>16</sub>H<sub>15</sub>NO<sub>3</sub> [M+H]<sup>+</sup>: 270.1125, found 270.1128.

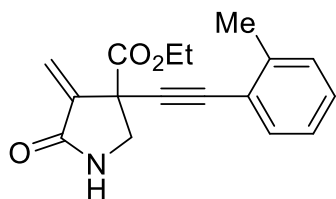

ethyl 4-methylene-5-oxo-3-(o-tolyethynyl)pyrrolidine-3-carboxylate (**4e**)

yellow oil, 47.0 mg, 82% yield;

<sup>1</sup>H NMR (400 MHz, CDCl<sub>3</sub>): δ 7.39-7.42 (m, 2H), 7.20-7.27 (m, 2H), 7.15 (t, J = 7.3 Hz, 1H), 6.32 (s, 1H), 6.02 (s, 1H), 4.25-4.31 (m, 3H), 3.73 (d, J = 9.6 Hz, 1H), 2.43 (s, 3H), 1.32 (t, J = 7.1 Hz, 3H)

<sup>13</sup>C NMR (100 MHz, CDCl<sub>3</sub>): δ 168.96, 168.21, 141.08, 140.68, 132.00, 129.55, 128.80, 125.64, 121.93, 120.94, 90.48, 82.97, 63.03, 50.18, 48.01, 20.71, 14.01

ESI-HRMS calcd for C<sub>17</sub>H<sub>18</sub>NO<sub>3</sub> [M+H]<sup>+</sup>: 284.1281, found 284.1280.

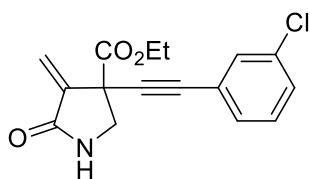

ethyl 3-((3-chlorophenyl)ethynyl)-4-methylene-5-oxopyrrolidine-3-carboxylate (**4g**)

White solid, 57.0 mg, 93% yield; mp 87-99 °C;

<sup>1</sup>H NMR (400 MHz, CDCl<sub>3</sub>): δ 7.75 (s, 1H), 7.40 (d, J = 1.8 Hz, 1H), 7.30-7.23 (m, 3H), 6.27 (s, 1H), 5.96 (s, 1H), 4.28-4.22 (m, 3H), 3.68 (d, J = 10.1 Hz, 1H), 1.29 (t, J = 7.3 Hz, 3H)

<sup>13</sup>C NMR (100 MHz, CDCl<sub>3</sub>): δ 168.52, 168.11, 140.67, 134.09, 131.64, 129.90, 129.53, 128.98, 123.73, 120.83, 87.76, 82.34, 63.01, 50.00, 47.58, 13.88

ESI-HRMS calcd for C<sub>16</sub>H<sub>15</sub>ClNO<sub>3</sub> [M+H]<sup>+</sup>: 304.0735, found 304.0732.

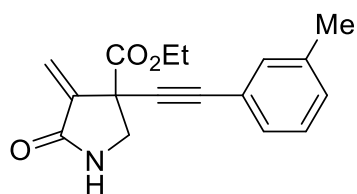

ethyl 4-methylene-5-oxo-3-(m-tolylethynyl)pyrrolidine-3-carboxylate(**4i**)

White solid, 47.0 mg, 82% yield; m.p. 88-90 °C;

<sup>1</sup>H NMR (400 MHz, CDCl<sub>3</sub>): δ 7.49 (s, 1H), 7.19-7.27 (m, 3H), 7.16 (s, 1H), 6.30 (s, 1H), 6.00 (d, J = 0.9 Hz, 1H), 4.24-4.29 (m, 3H), 3.71 (d, J = 9.6 Hz, 1H), 2.33 (s, 3H), 1.31 (t, J = 7.1 Hz, 3H)

<sup>13</sup>C NMR (100 MHz, CDCl<sub>3</sub>): δ 168.79, 168.14, 140.84, 137.99, 132.33, 129.55, 128.80, 128.17, 121.84, 120.79, 86.08, 83.91, 62.88, 50.05, 47.73, 21.14, 13.87

ESI-HRMS calcd for C<sub>17</sub>H<sub>18</sub>NO<sub>3</sub> [M+H]<sup>+</sup>: 284.1281, found 284.1286.

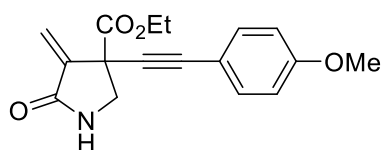

ethyl 3-((4-methoxyphenyl)ethynyl)-4-methylene-5-oxopyrrolidine-3-carboxylate (**4p**)

yellow oil, 37.0 mg, 62% yield;

<sup>1</sup>H NMR (400 MHz, CDCl<sub>3</sub>): δ 7.41-7.34 (2H), 6.87-6.80 (2H), 6.67-6.60 (1H), 6.33-6.29 (1H), 6.03-5.98 (1H), 4.33-4.18 (4H), 3.84-3.78 (3H), 3.73-3.65 (1H), 1.35-1.27 (3H)

<sup>13</sup>C NMR (100 MHz, CDCl<sub>3</sub>): δ 175.92, 168.93, 168.78, 159.73, 140.94, 133.13, 120.98, 113.97, 113.78, 84.93, 83.60, 62.78, 60.33, 55.15, 50.43, 47.54, 20.90, 14.05, 13.77

ESI-HRMS calcd for C<sub>17</sub>H<sub>18</sub>NO<sub>4</sub> [M+H]<sup>+</sup>: 300.1230, found 300.1238.

#### 4. X-ray Crystallographic Analysis

X-ray Crystallographic Data of **3d** (CCDC 2232307)

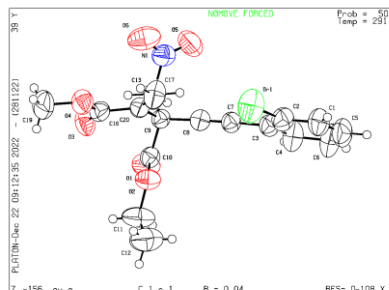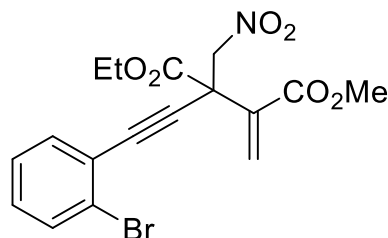

---

|                                                               |                                                   |                                                   |            |
|---------------------------------------------------------------|---------------------------------------------------|---------------------------------------------------|------------|
| Bond precision:                                               | C-C = 0.0113 Å                                    | Wavelength=0.71013                                |            |
| Cell:                                                         | a=9.220(3)                                        | b=27.479(9)                                       | c=8.339(3) |
|                                                               | alpha=90                                          | beta=118.518(1)                                   | gamma=90   |
| Temperature:                                                  | 291 K                                             |                                                   |            |
|                                                               | Calculated                                        | Reported                                          |            |
| Volume                                                        | 1856.3(11)                                        | 1856.5(10)                                        |            |
| Space group                                                   | C c                                               | C c                                               |            |
| Hall group                                                    | C -2 γ c                                          | C -2 γ c                                          |            |
| Moiety formula                                                | C <sub>18</sub> H <sub>16</sub> Br O <sub>6</sub> | ?                                                 |            |
| Sum formula                                                   | C <sub>18</sub> H <sub>16</sub> Br O <sub>6</sub> | C <sub>18</sub> H <sub>16</sub> Br O <sub>6</sub> |            |
| Mr                                                            | 408.21                                            | 408.22                                            |            |
| D <sub>x</sub> , g cm <sup>-3</sup>                           | 1.329                                             | 1.329                                             |            |
| Z                                                             | 4                                                 | 4                                                 |            |
| Mu (mm <sup>-1</sup> )                                        | 2.244                                             | 2.243                                             |            |
| F <sub>000</sub>                                              | 828.0                                             | 828.0                                             |            |
| F <sub>000</sub> '                                            | 827.29                                            |                                                   |            |
| h,k,lmax                                                      | 11,35,10                                          | 11,35,10                                          |            |
| Nref                                                          | 4259[2138]                                        | 3197                                              |            |
| Tmin,Tmax                                                     | 0.754,0.799                                       | 0.054,0.095                                       |            |
| Tmin'                                                         | 0.739                                             |                                                   |            |
| Correction method= # Reported T Limits: Tmin=0.054 Tmax=0.095 |                                                   |                                                   |            |
| AbsCorr = MULTI-SCAN                                          |                                                   |                                                   |            |
| Data completeness=                                            | 1.50/0.75                                         | Theta(max)= 27.510                                |            |
| R(reflections)=                                               | 0.0431( 2255)                                     | wR2(reflections)= 0.1521( 3197)                   |            |
| S =                                                           | 0.915                                             | Npar= 228                                         |            |

---

X-ray Crystallographic Data of **3q** (CCDC 2232796)

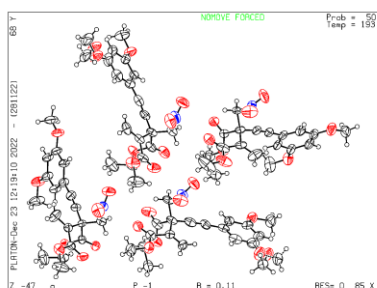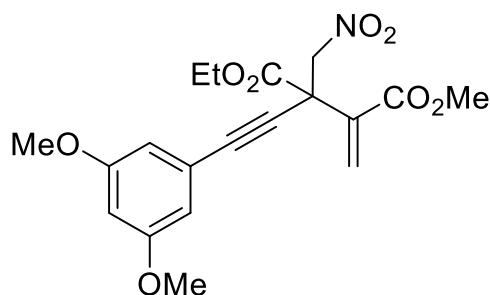

|                                     |                                                                      |                                                  |
|-------------------------------------|----------------------------------------------------------------------|--------------------------------------------------|
| Bond precision:                     | C-C = 0.0103 Å                                                       | Wavelength=0.71073                               |
| Cell:                               | a=9.065(2)                                                           | b=14.720(3) c=31.665(9)                          |
|                                     | alpha=102.672(11)                                                    | beta=97.280(12) gamma=94.451(7)                  |
| Temperature:                        | 291 K                                                                |                                                  |
|                                     | Calculated                                                           | Reported                                         |
| Volume                              | 4064.8(17)                                                           | 4064.9(18)                                       |
| Space group                         | P -1                                                                 | P -1                                             |
| Hall group                          | -P 1                                                                 | -P 1                                             |
| Moiety formula                      | C <sub>19</sub> H <sub>21</sub> N O <sub>8</sub>                     | C <sub>19</sub> H <sub>21</sub> N O <sub>8</sub> |
| Sum formula                         | C <sub>19</sub> H <sub>21</sub> N O <sub>8</sub>                     | C <sub>19</sub> H <sub>21</sub> N O <sub>8</sub> |
| Mr                                  | 391.37                                                               | 391.37                                           |
| D <sub>x</sub> , g cm <sup>-3</sup> | 1.279                                                                | 1.279                                            |
| Z                                   | 8                                                                    | 8                                                |
| Mu (mm <sup>-1</sup> )              | 0.101                                                                | 0.101                                            |
| F <sub>000</sub>                    | 1648.0                                                               | 1648.0                                           |
| F <sub>000</sub> '                  | 1649.02                                                              |                                                  |
| h,k,l <sub>max</sub>                | 11,19,41                                                             | 11,19,40                                         |
| N <sub>ref</sub>                    | 18855                                                                | 18223                                            |
| T <sub>min</sub> ,T <sub>max</sub>  | 0.987,0.990                                                          | 0.489,0.746                                      |
| T <sub>min</sub> '                  | 0.987                                                                |                                                  |
| Correction method=                  | # Reported T Limits: T <sub>min</sub> =0.489 T <sub>max</sub> =0.746 |                                                  |
| AbsCorr =                           | MULTI-SCAN                                                           |                                                  |
| Data completeness=                  | 0.966                                                                | Theta(max)= 27.599                               |
| R(reflections)=                     | 0.1110( 8959)                                                        | wR2(reflections)= 0.3516( 18223)                 |
| S =                                 | 1.049                                                                | N <sub>par</sub> = 1066                          |

## 5. Reference

1. Z.-H. Yang, P. Chen, Z.-C. Chen, Z. Chen, W. Du, Y.-C. Chen, *Angew. Chem., Int. Ed.* **2021**, 60, 13913-13917.

## 6. Copies of NMR spectra



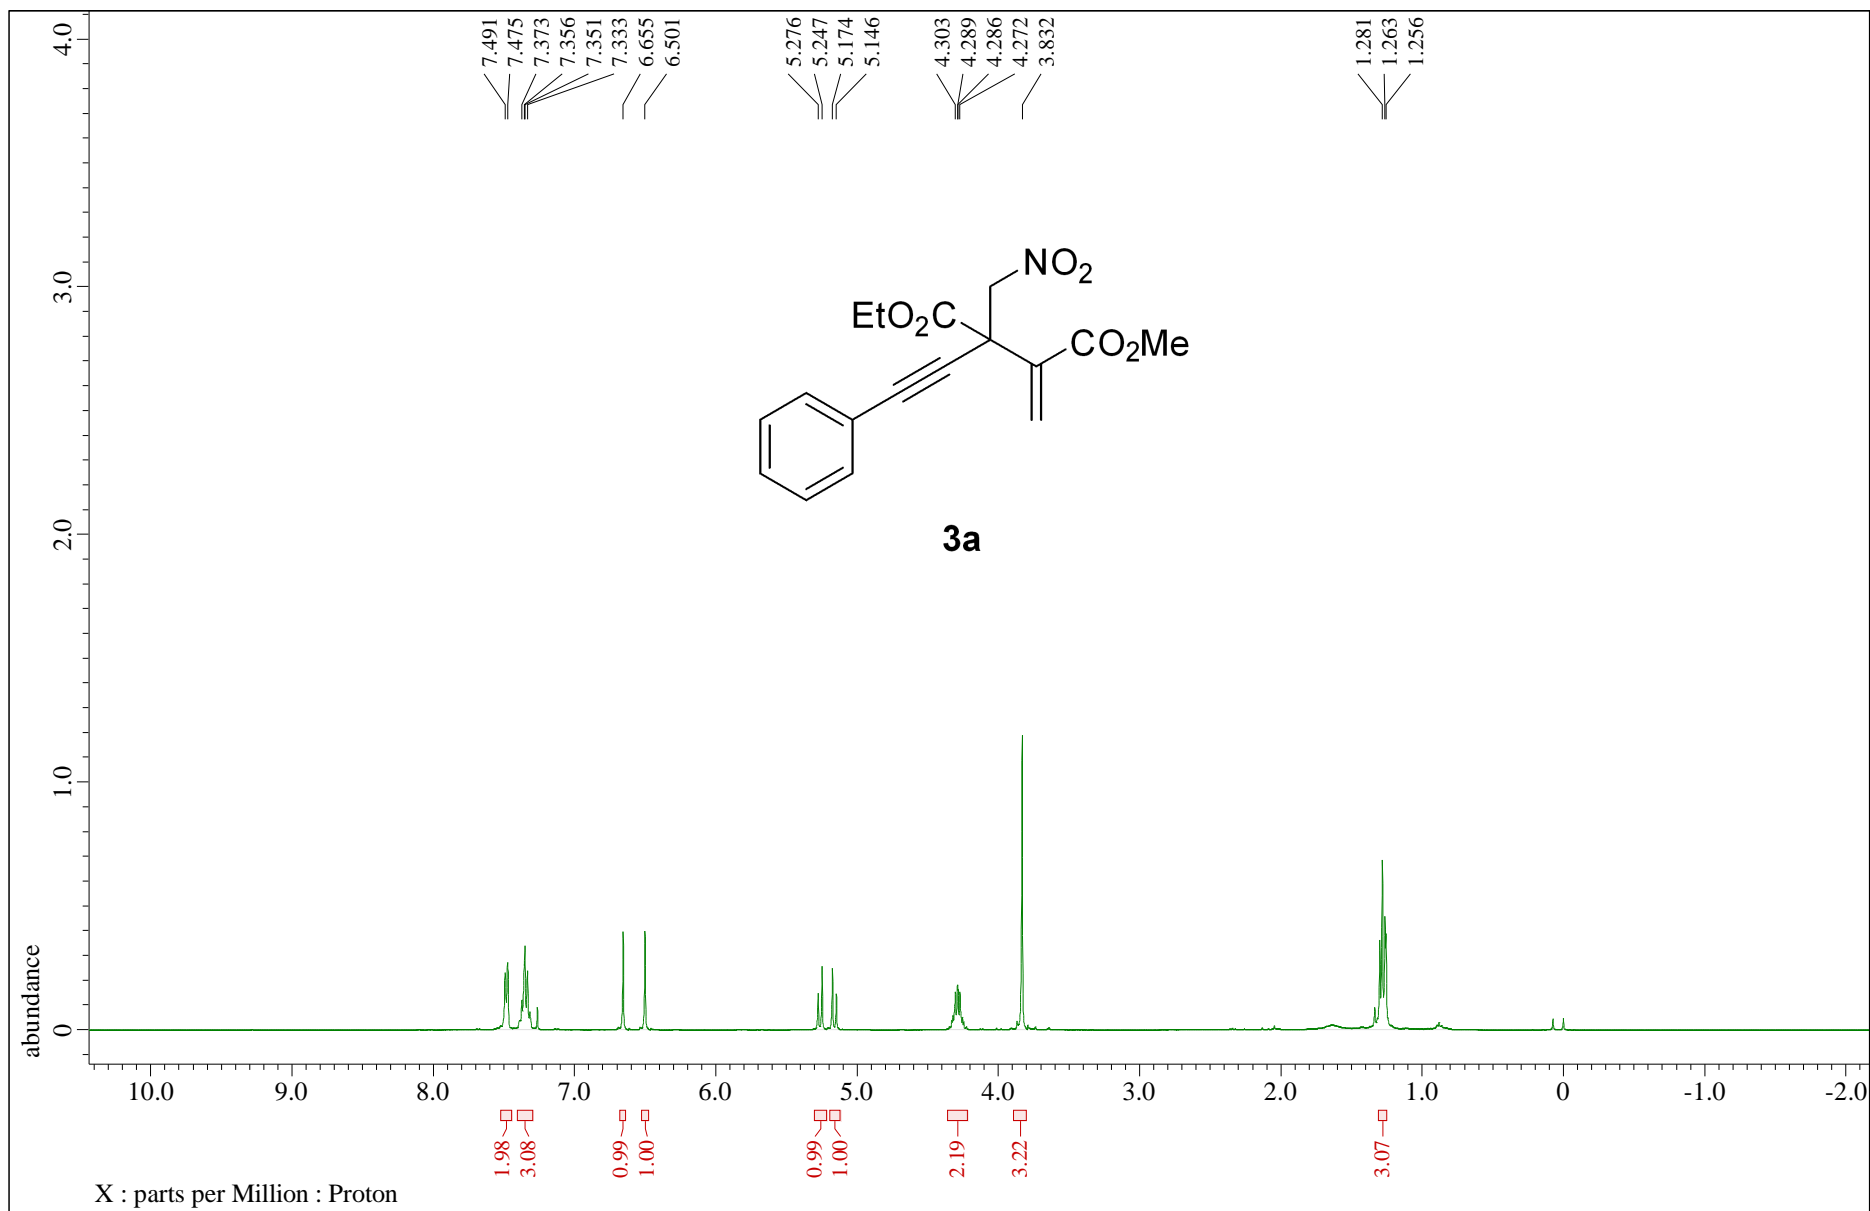

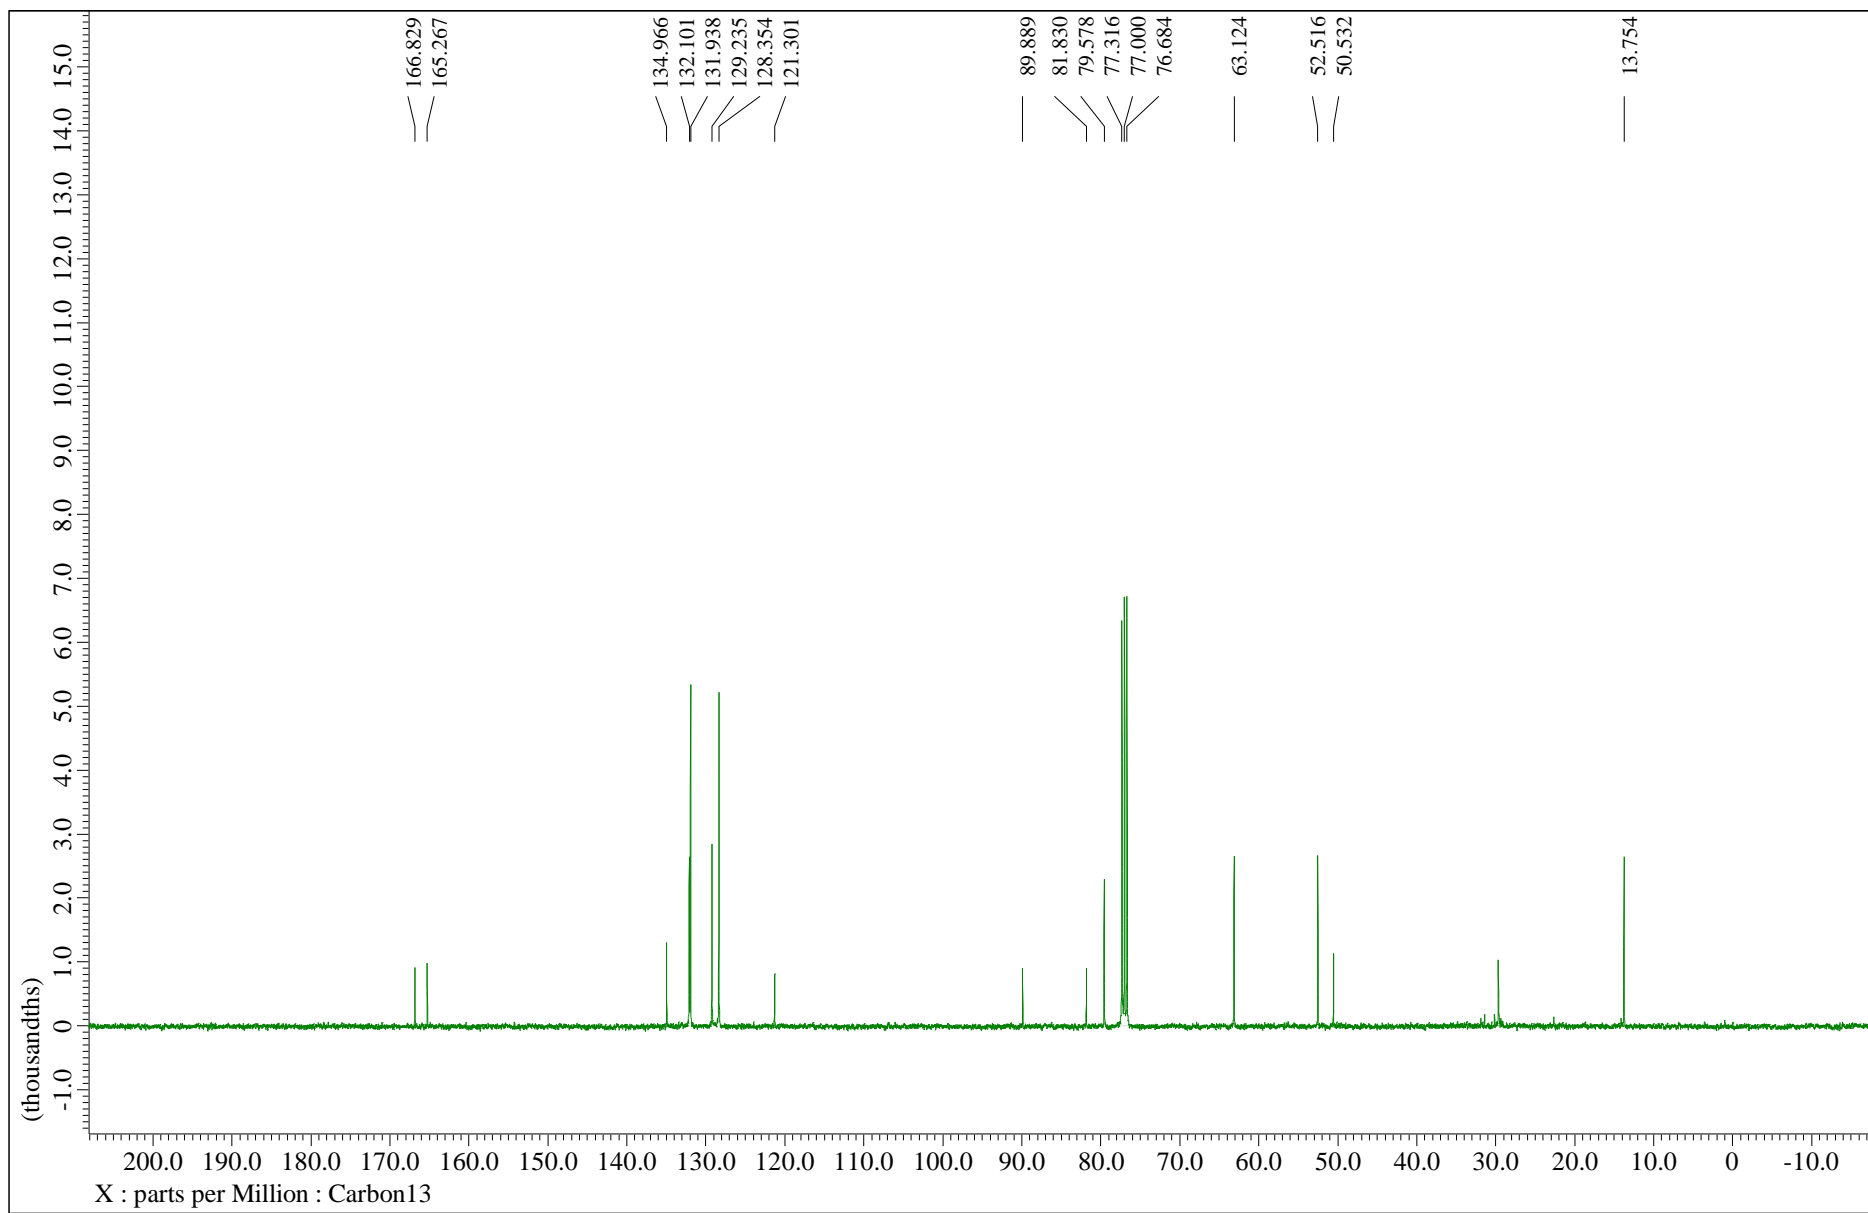

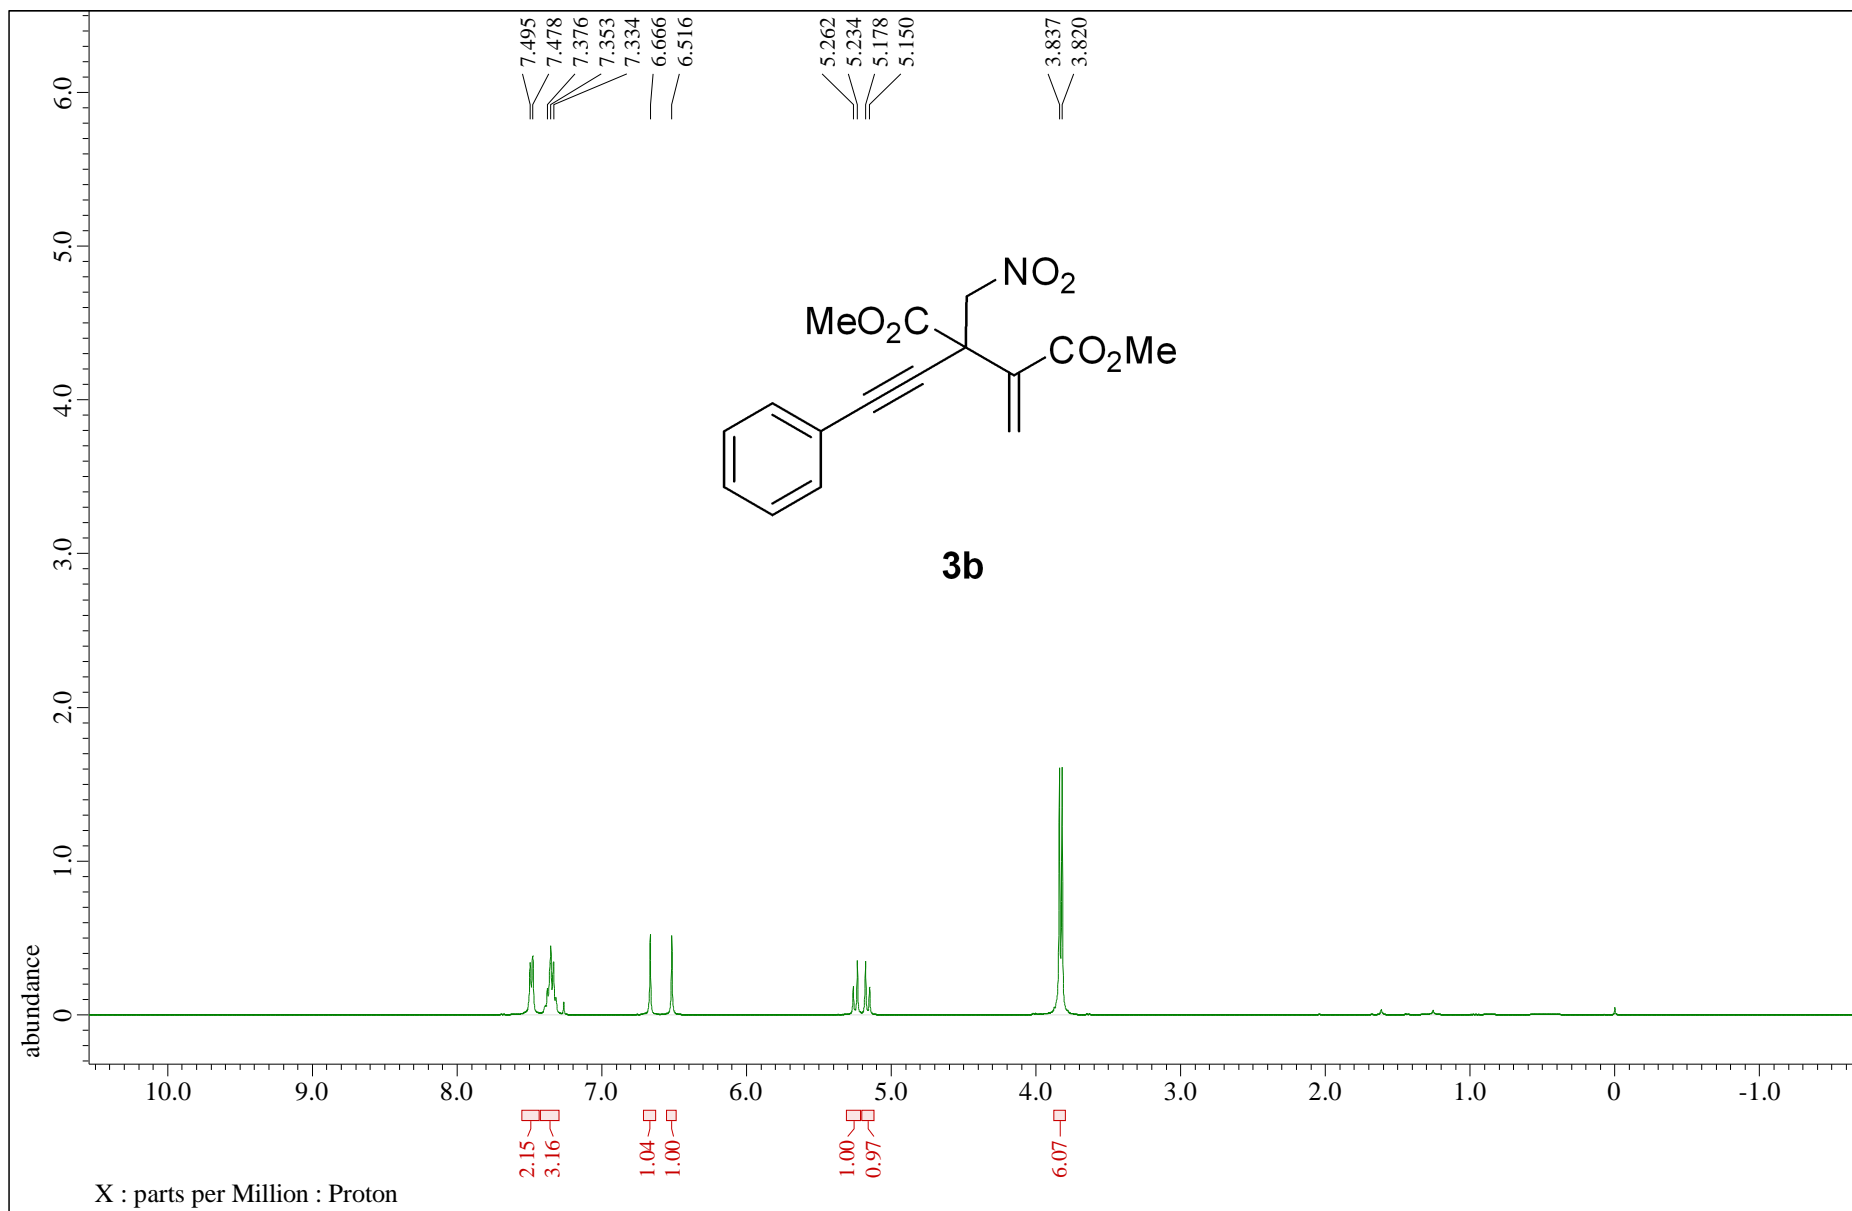

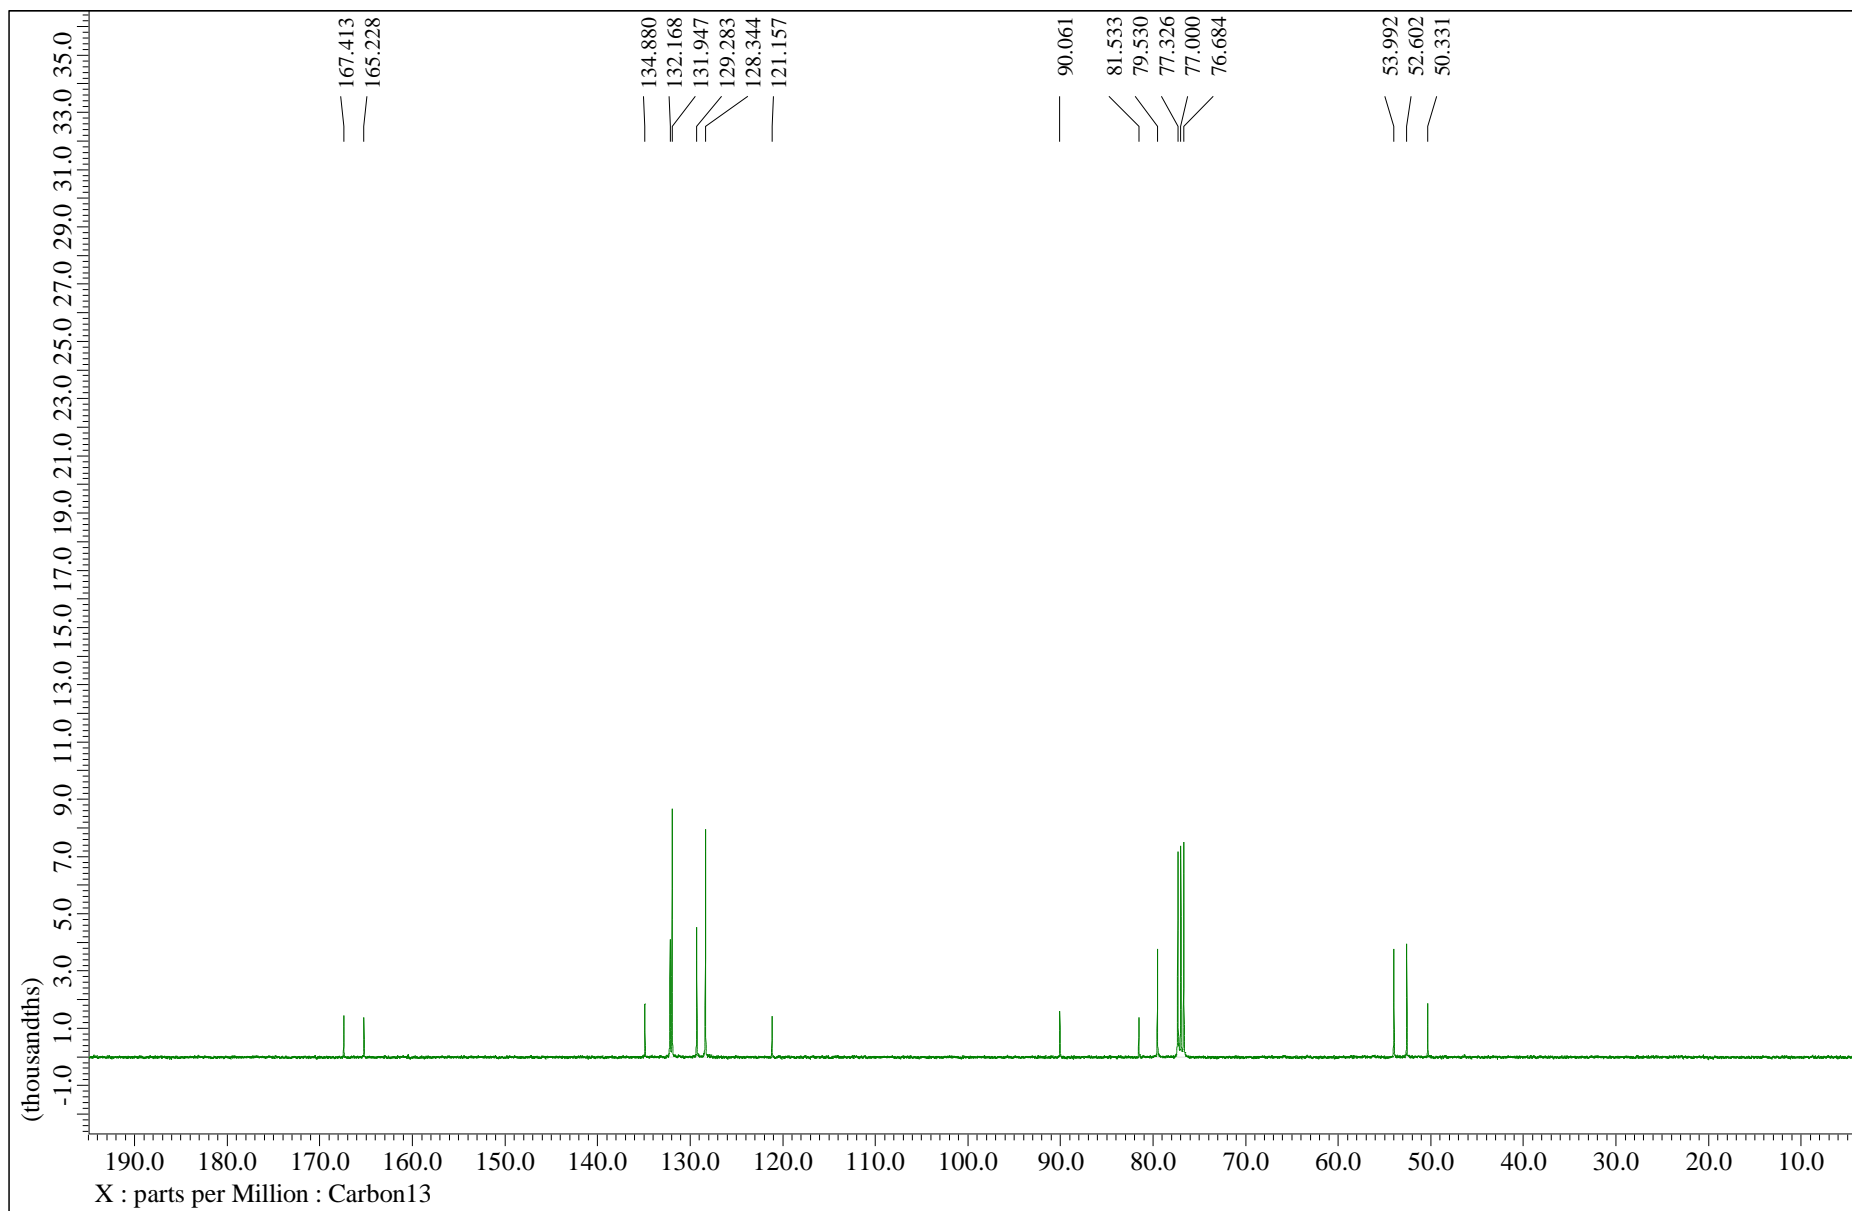

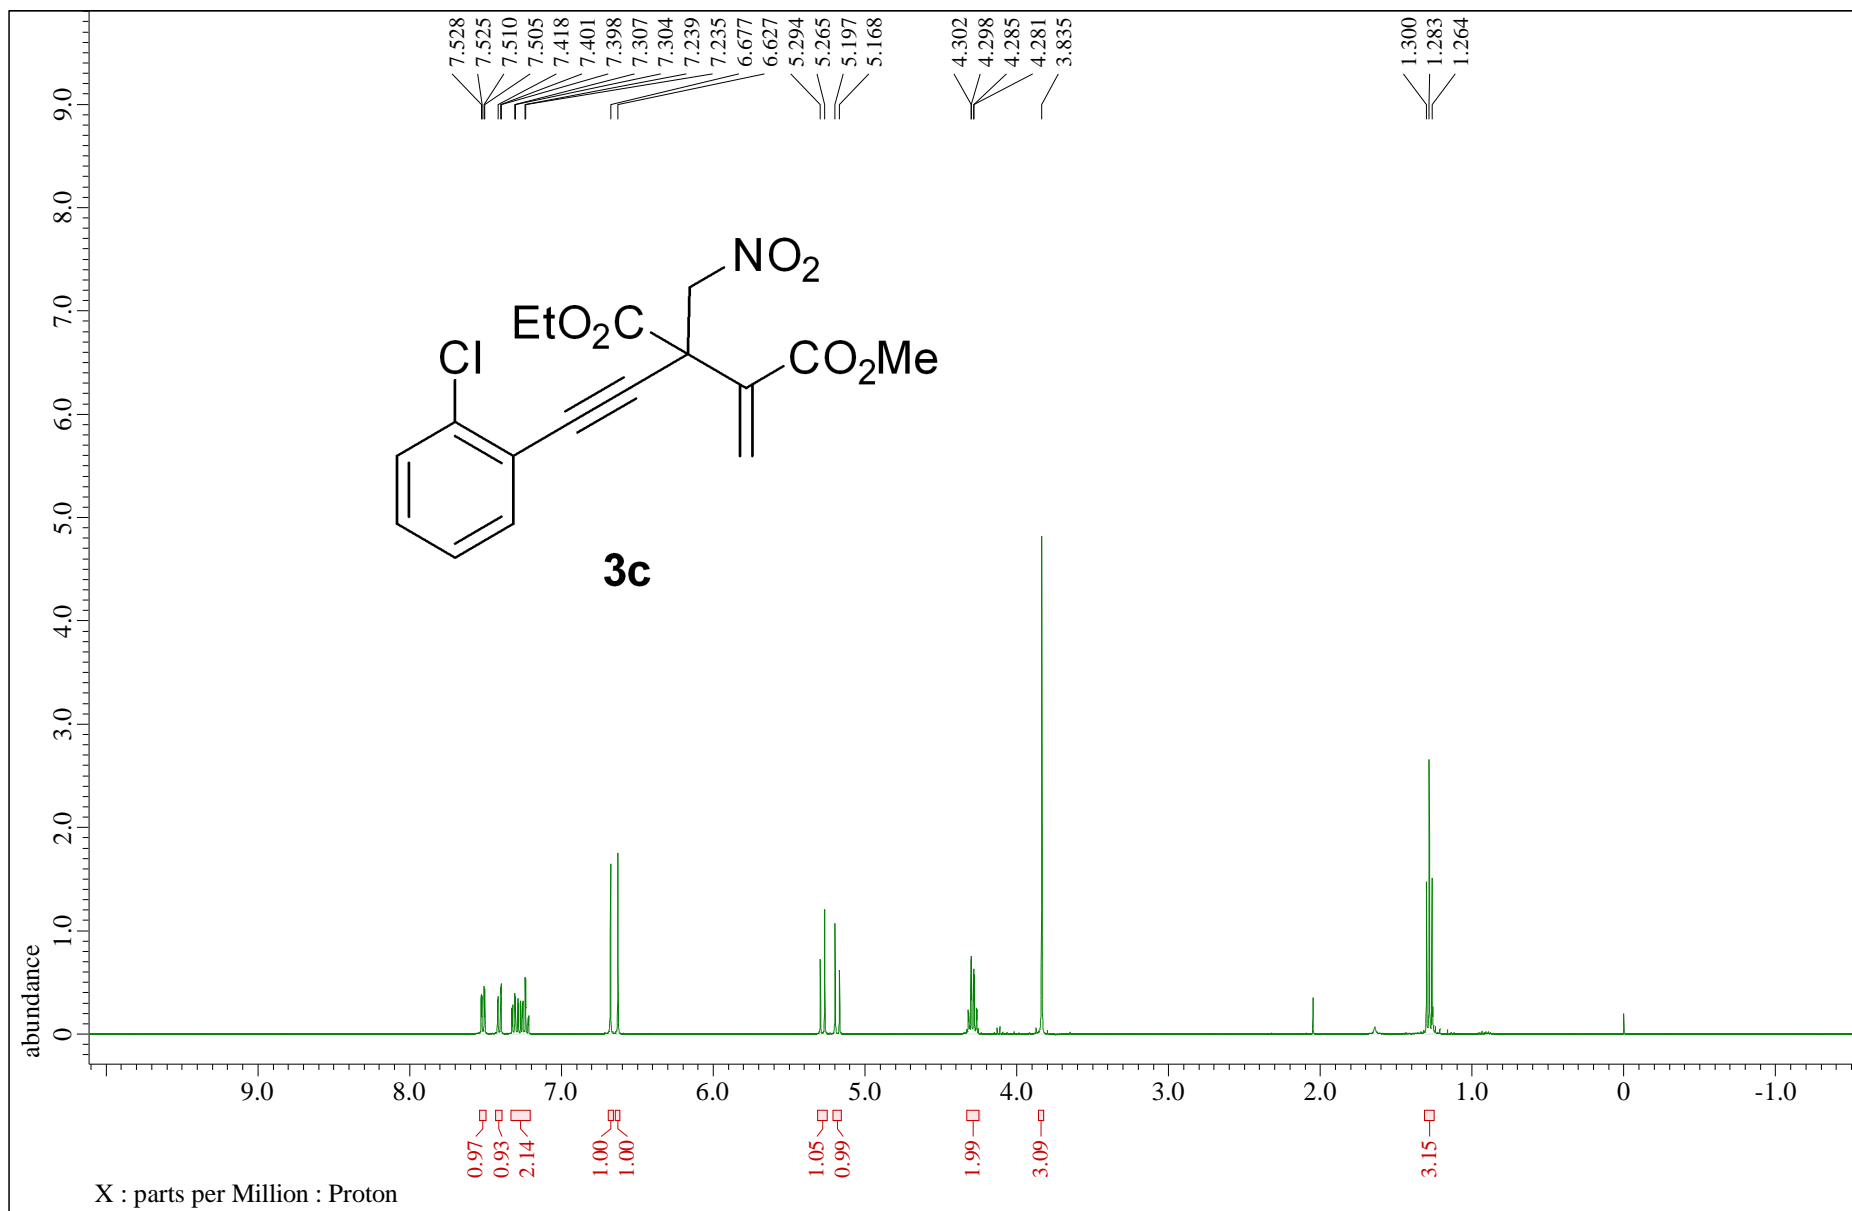

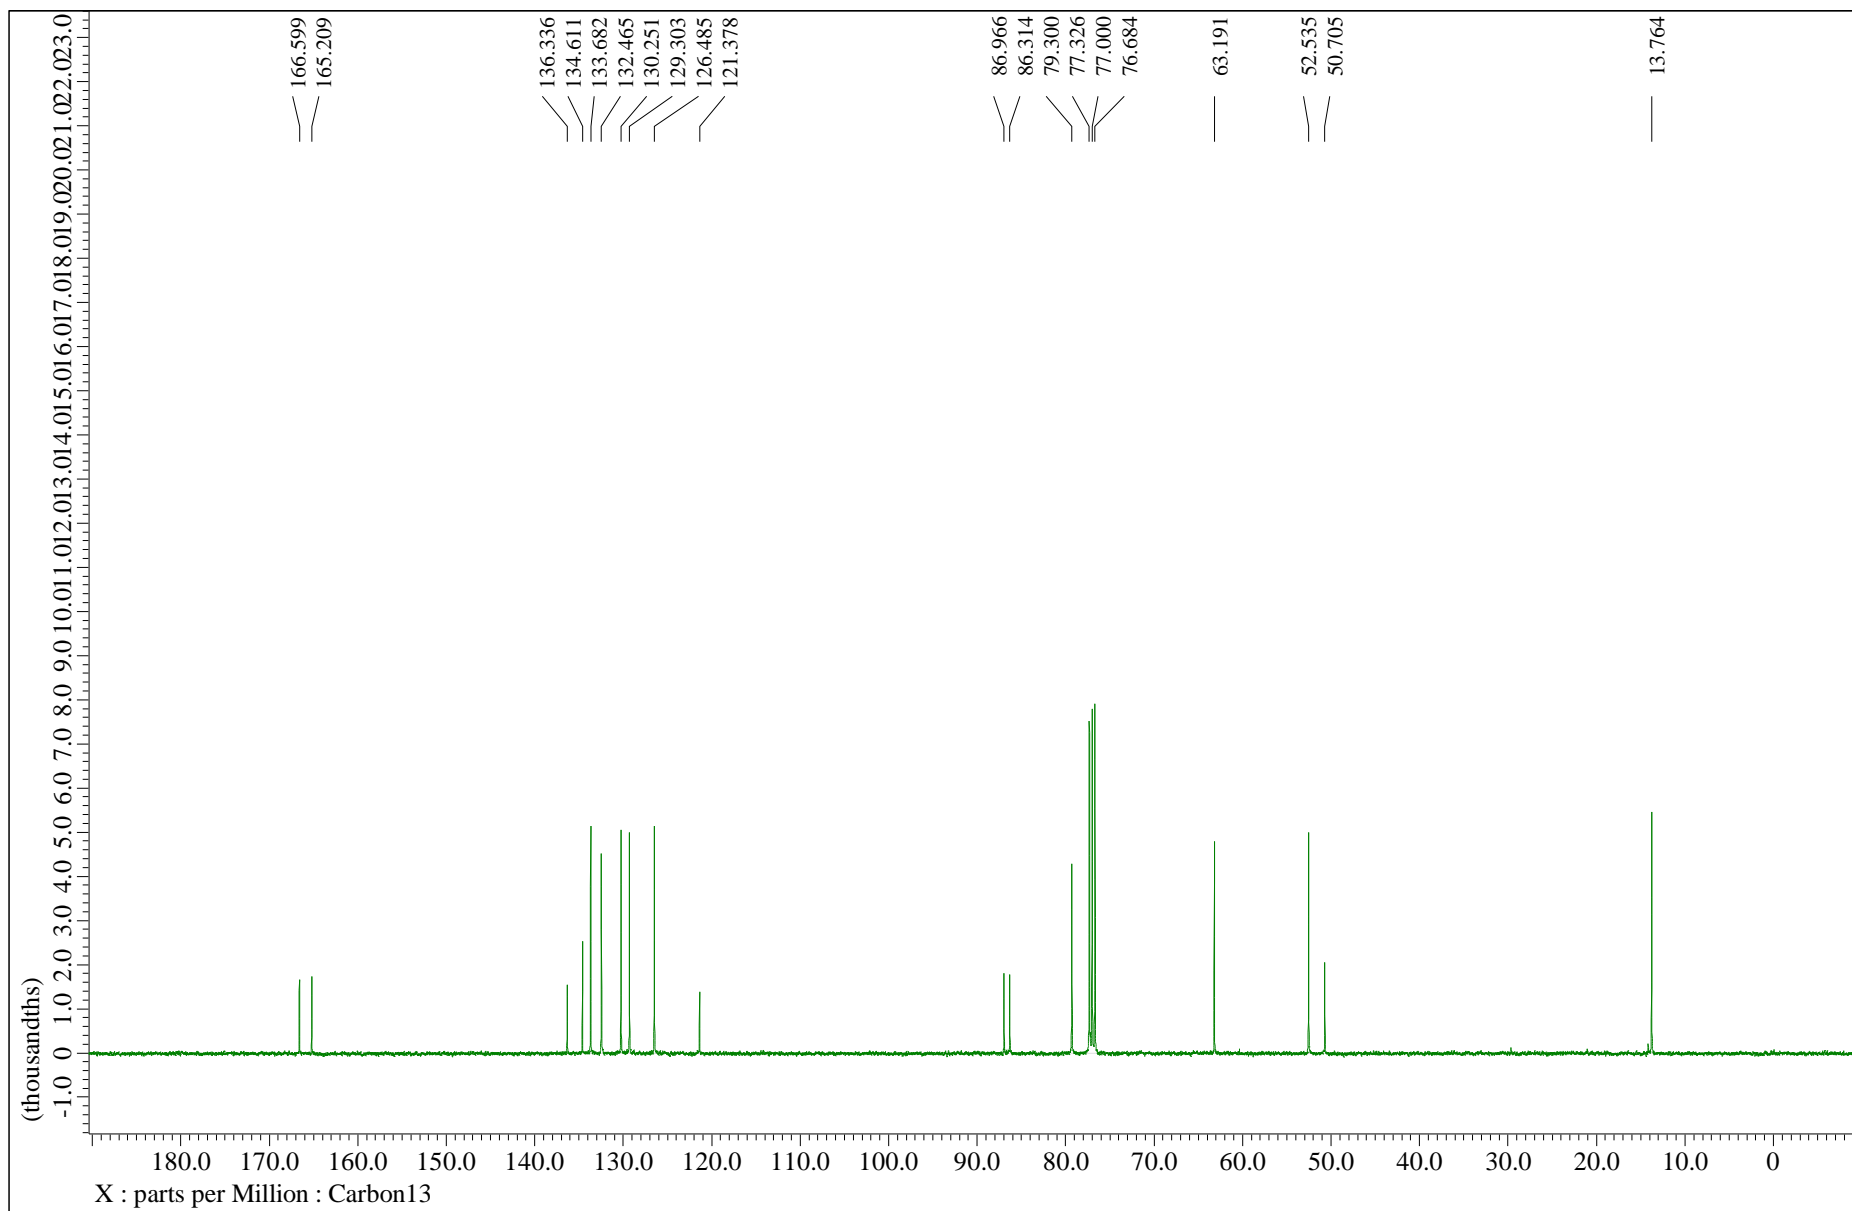

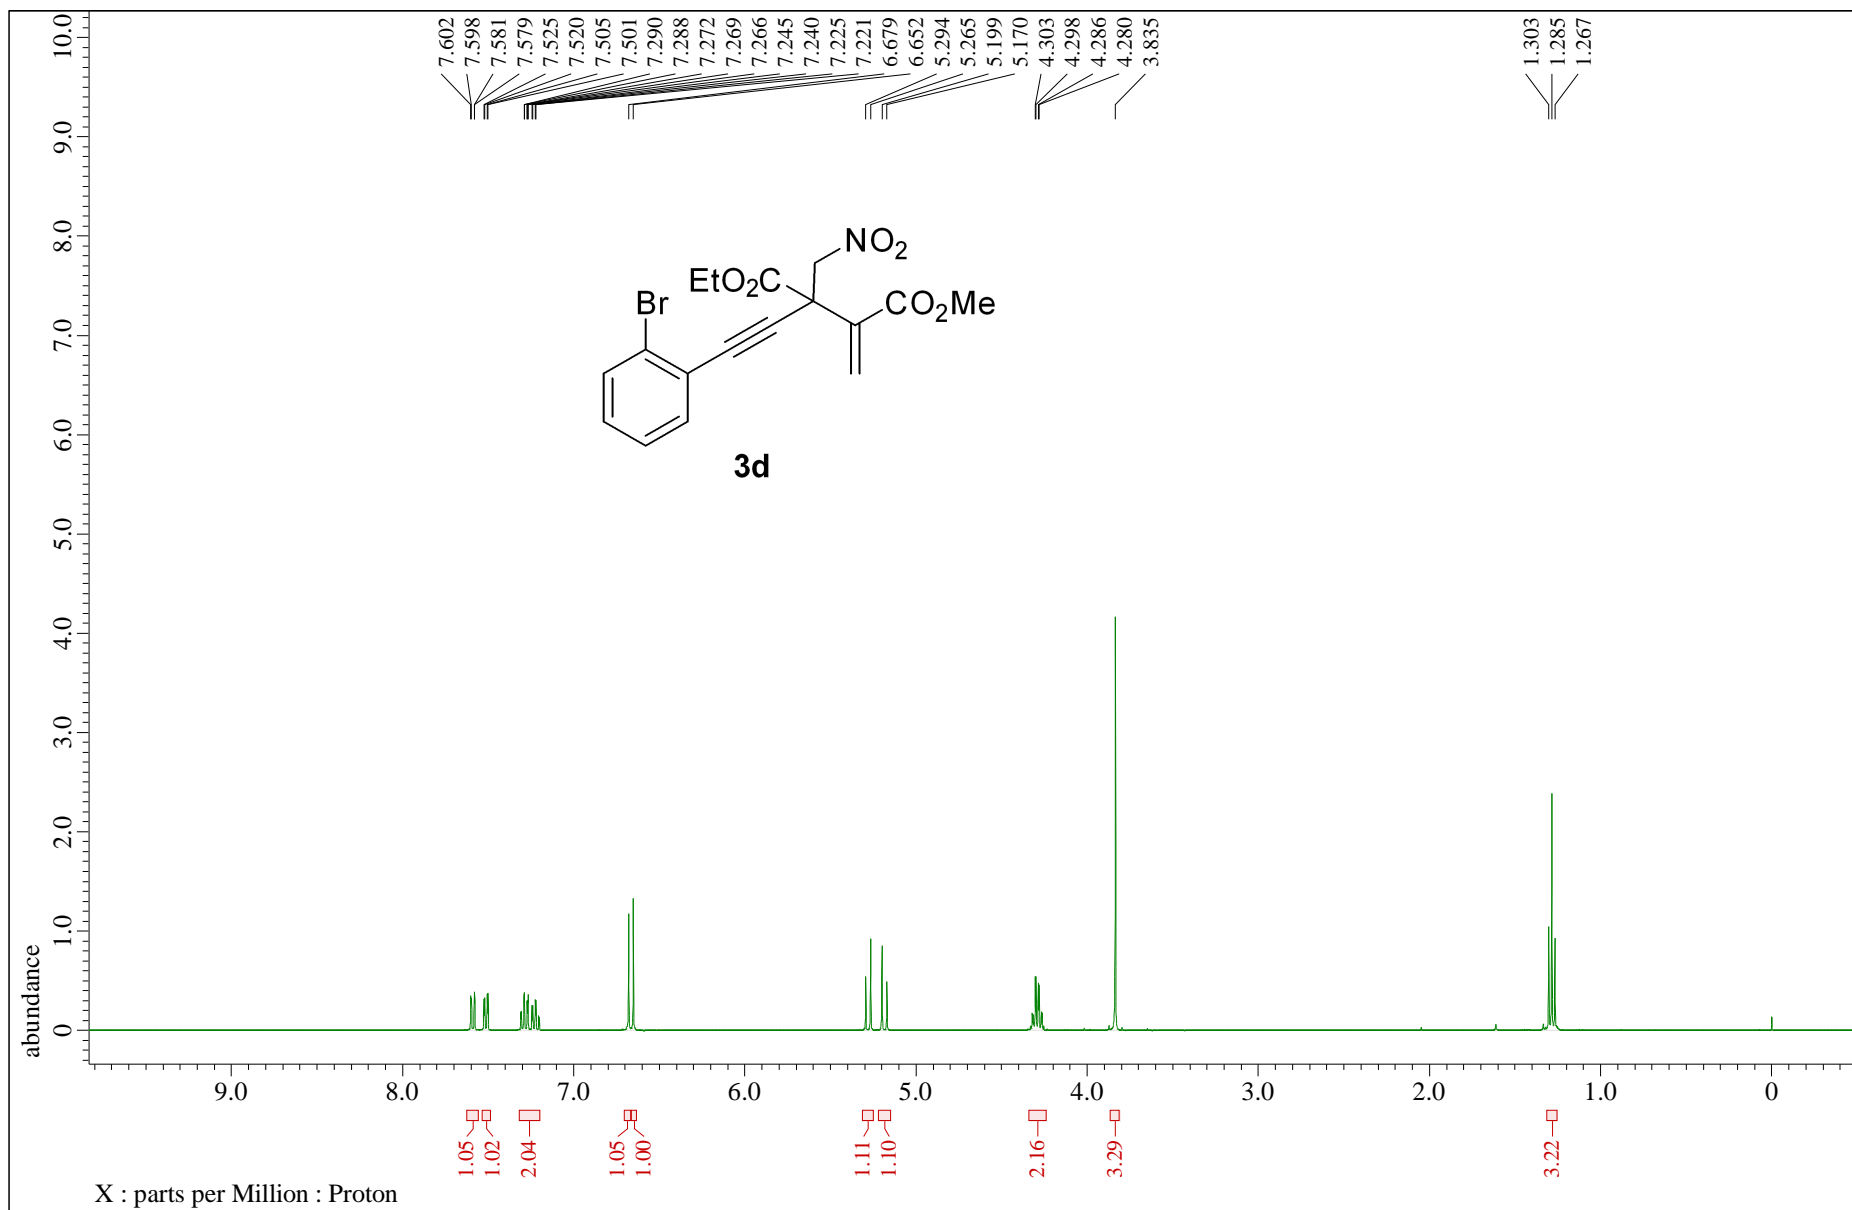

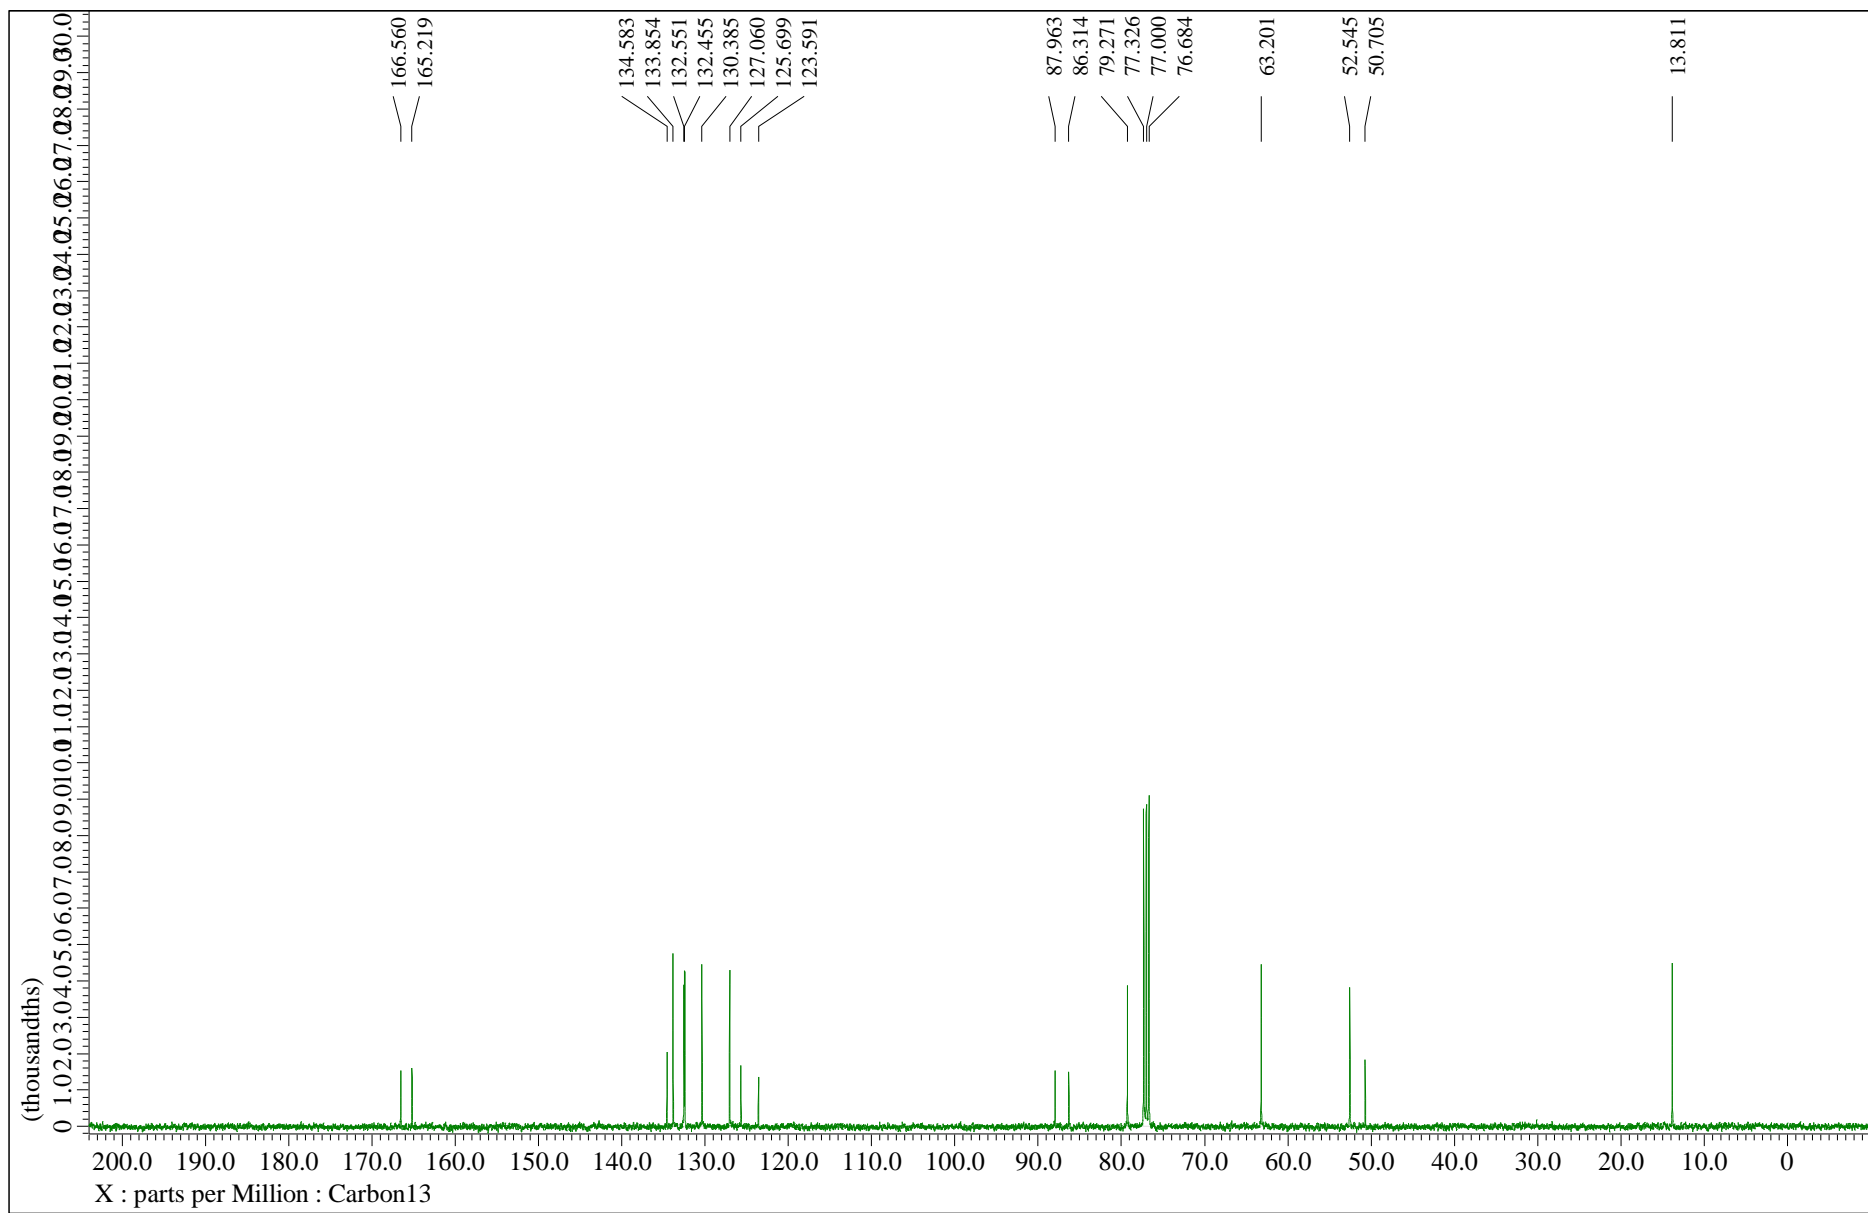



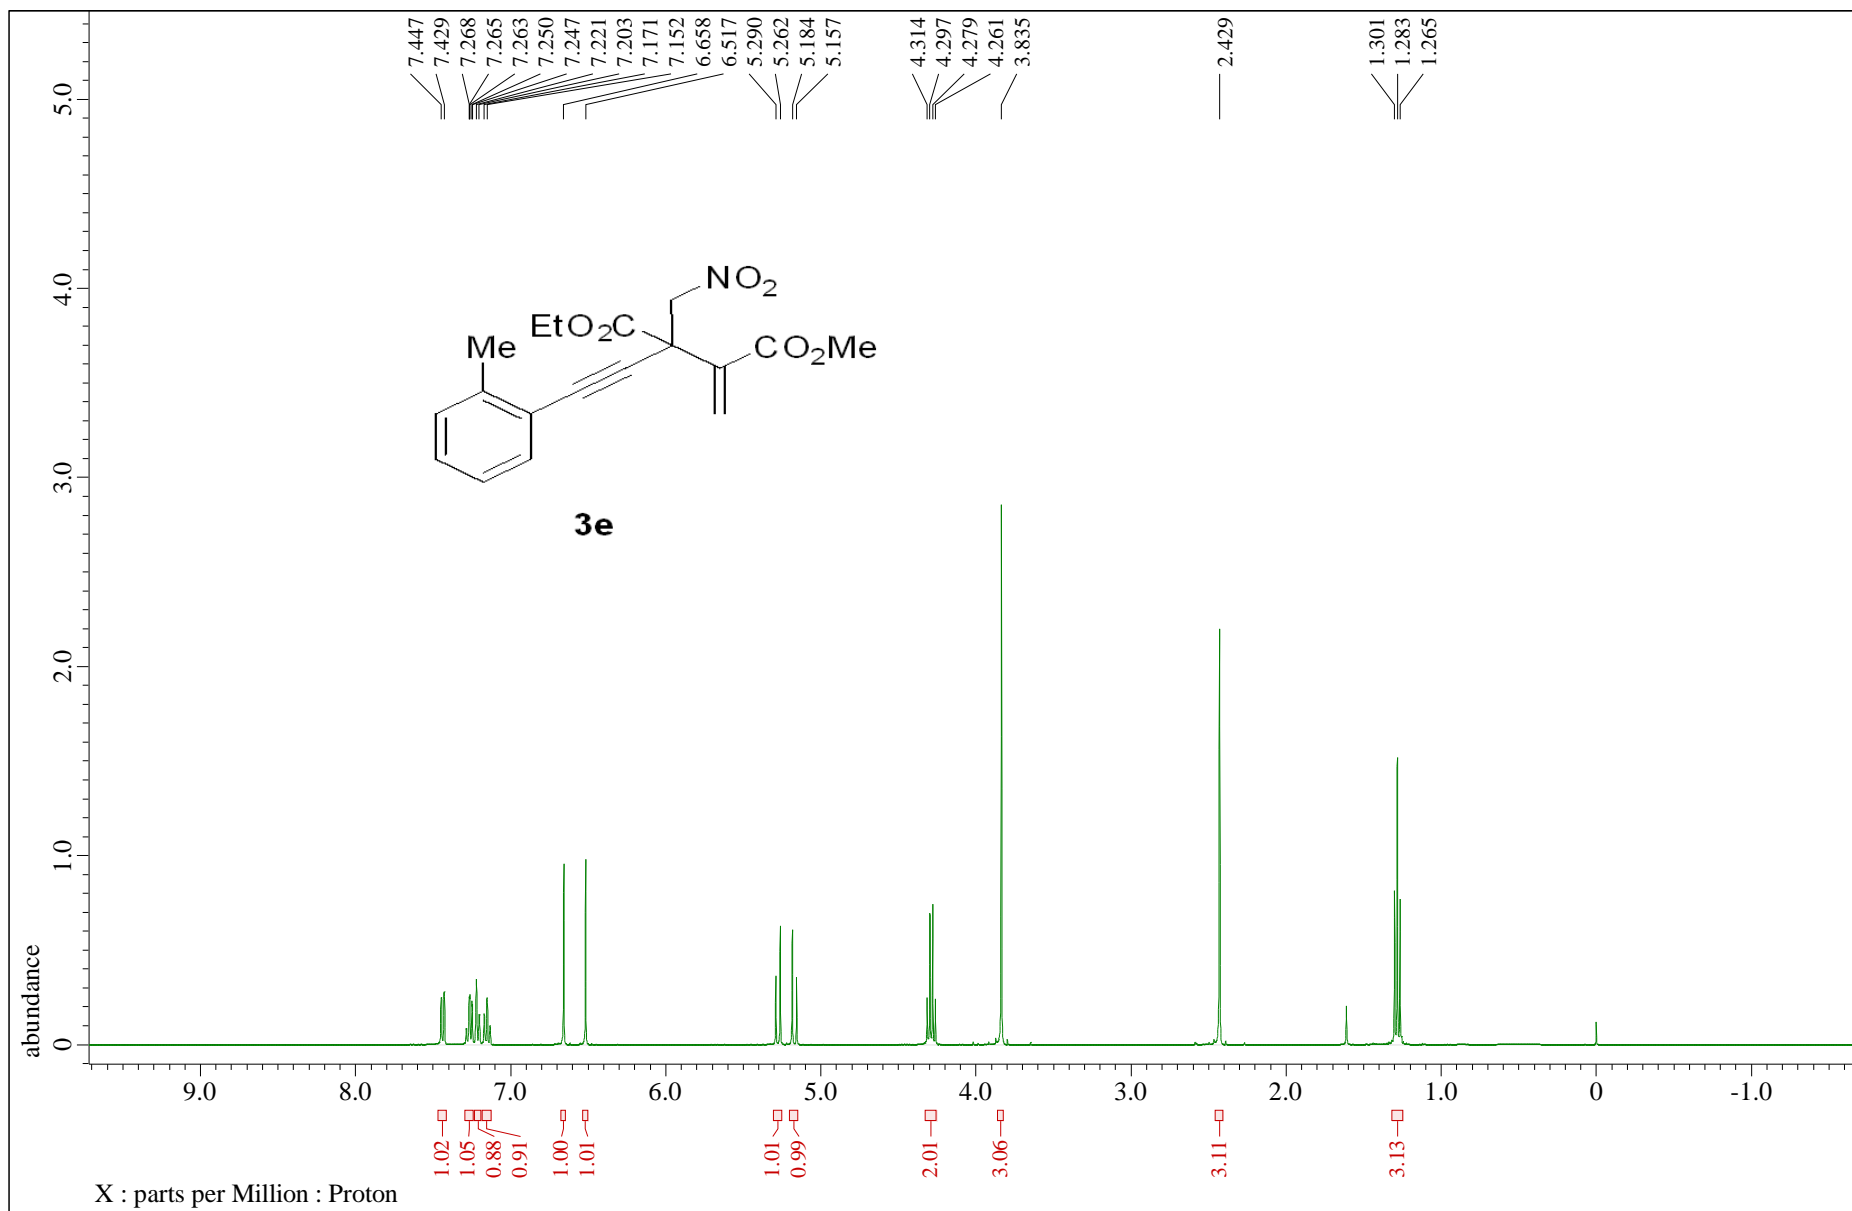

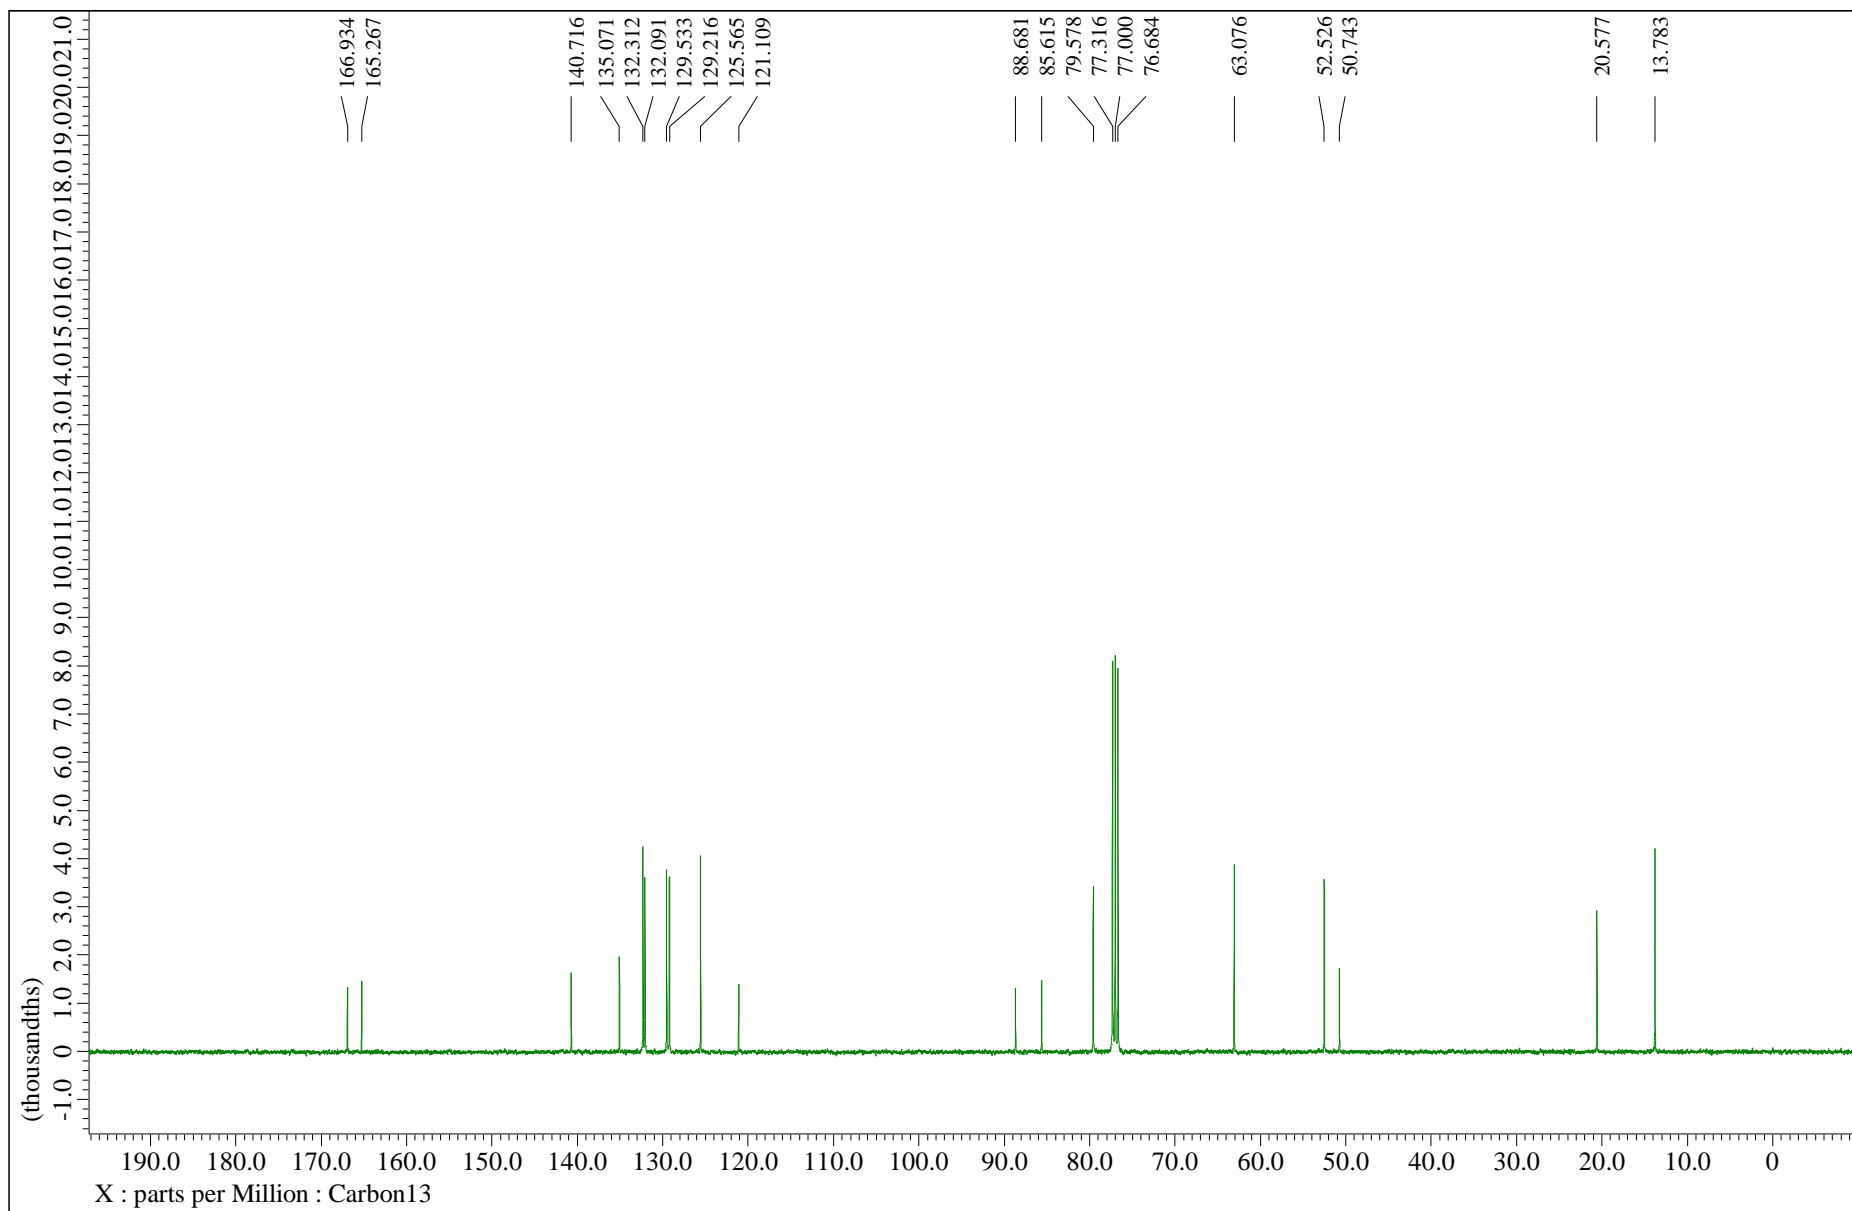

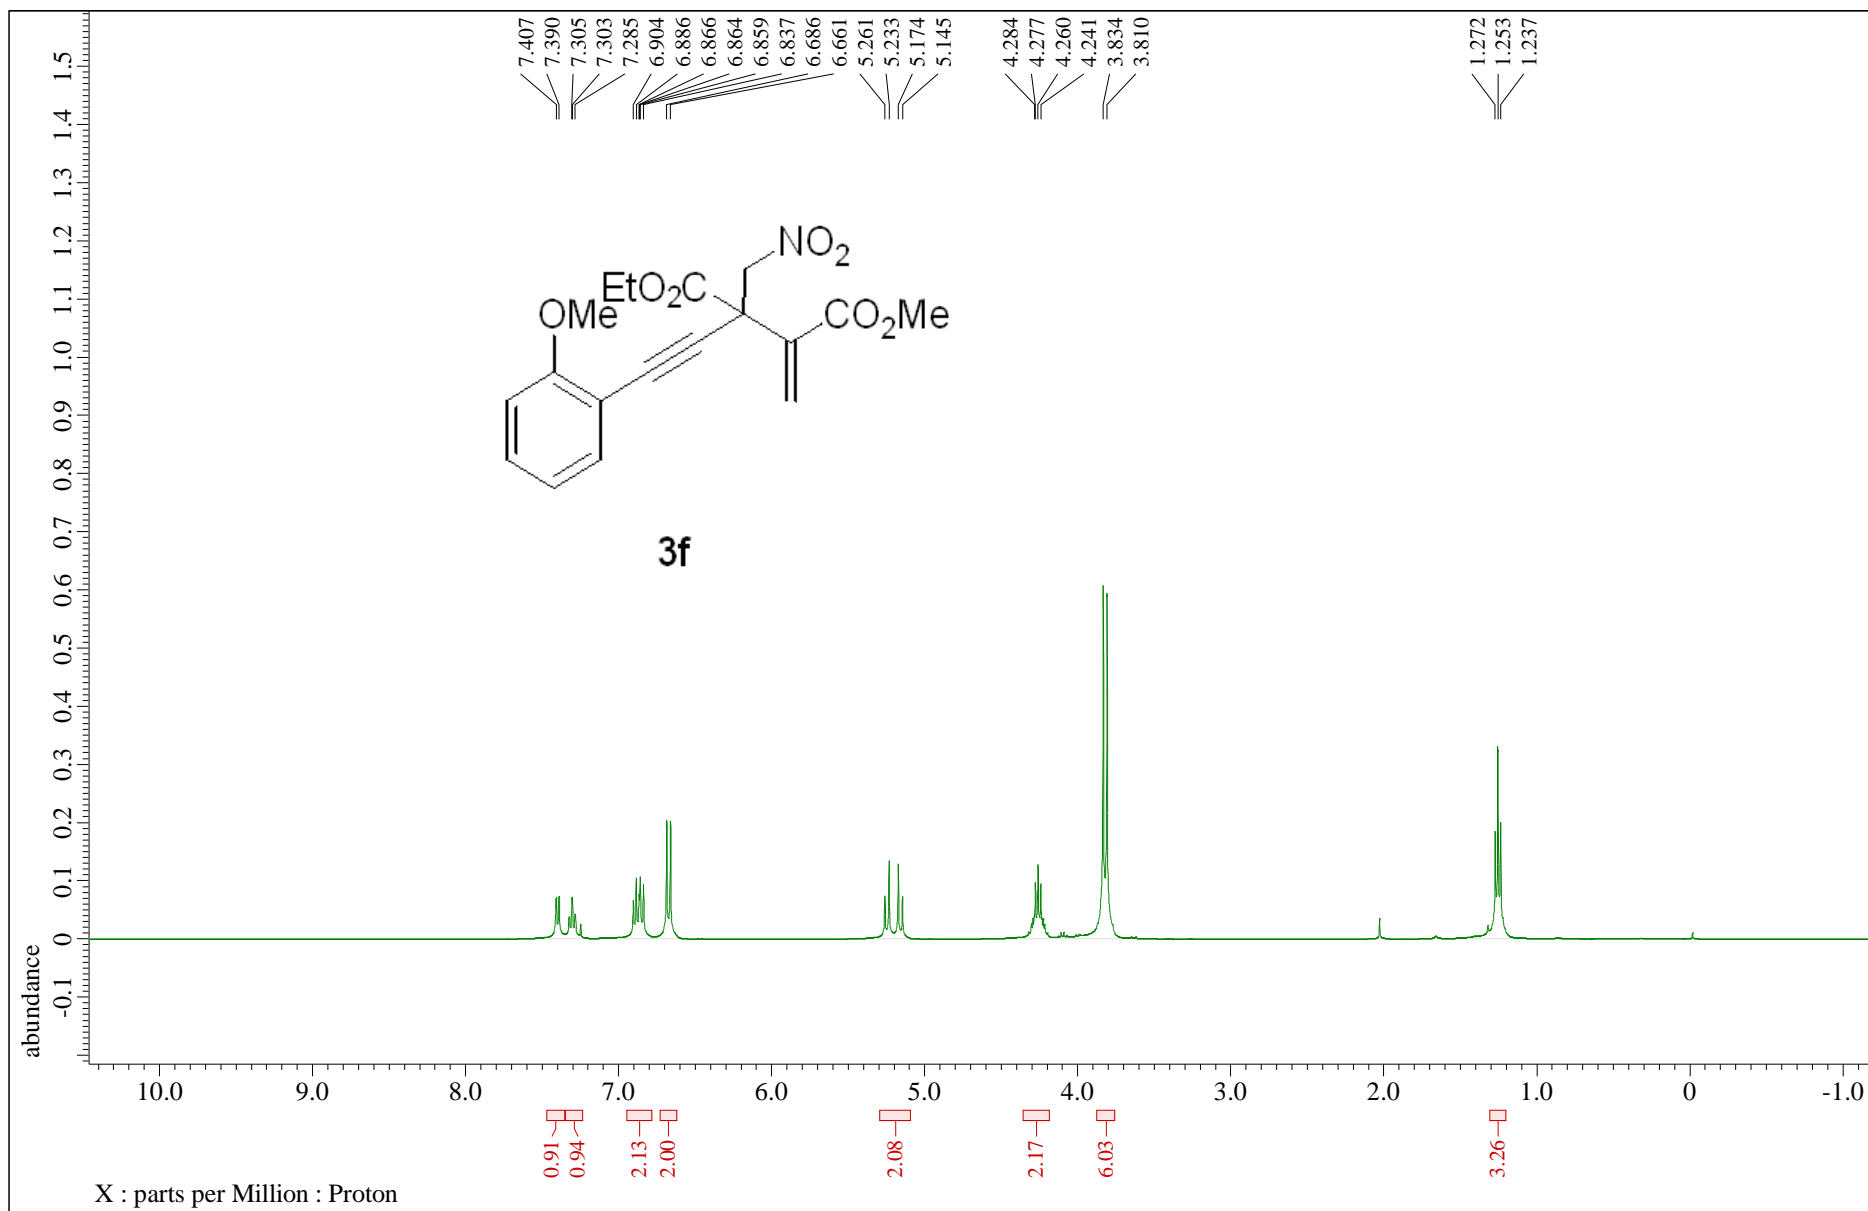

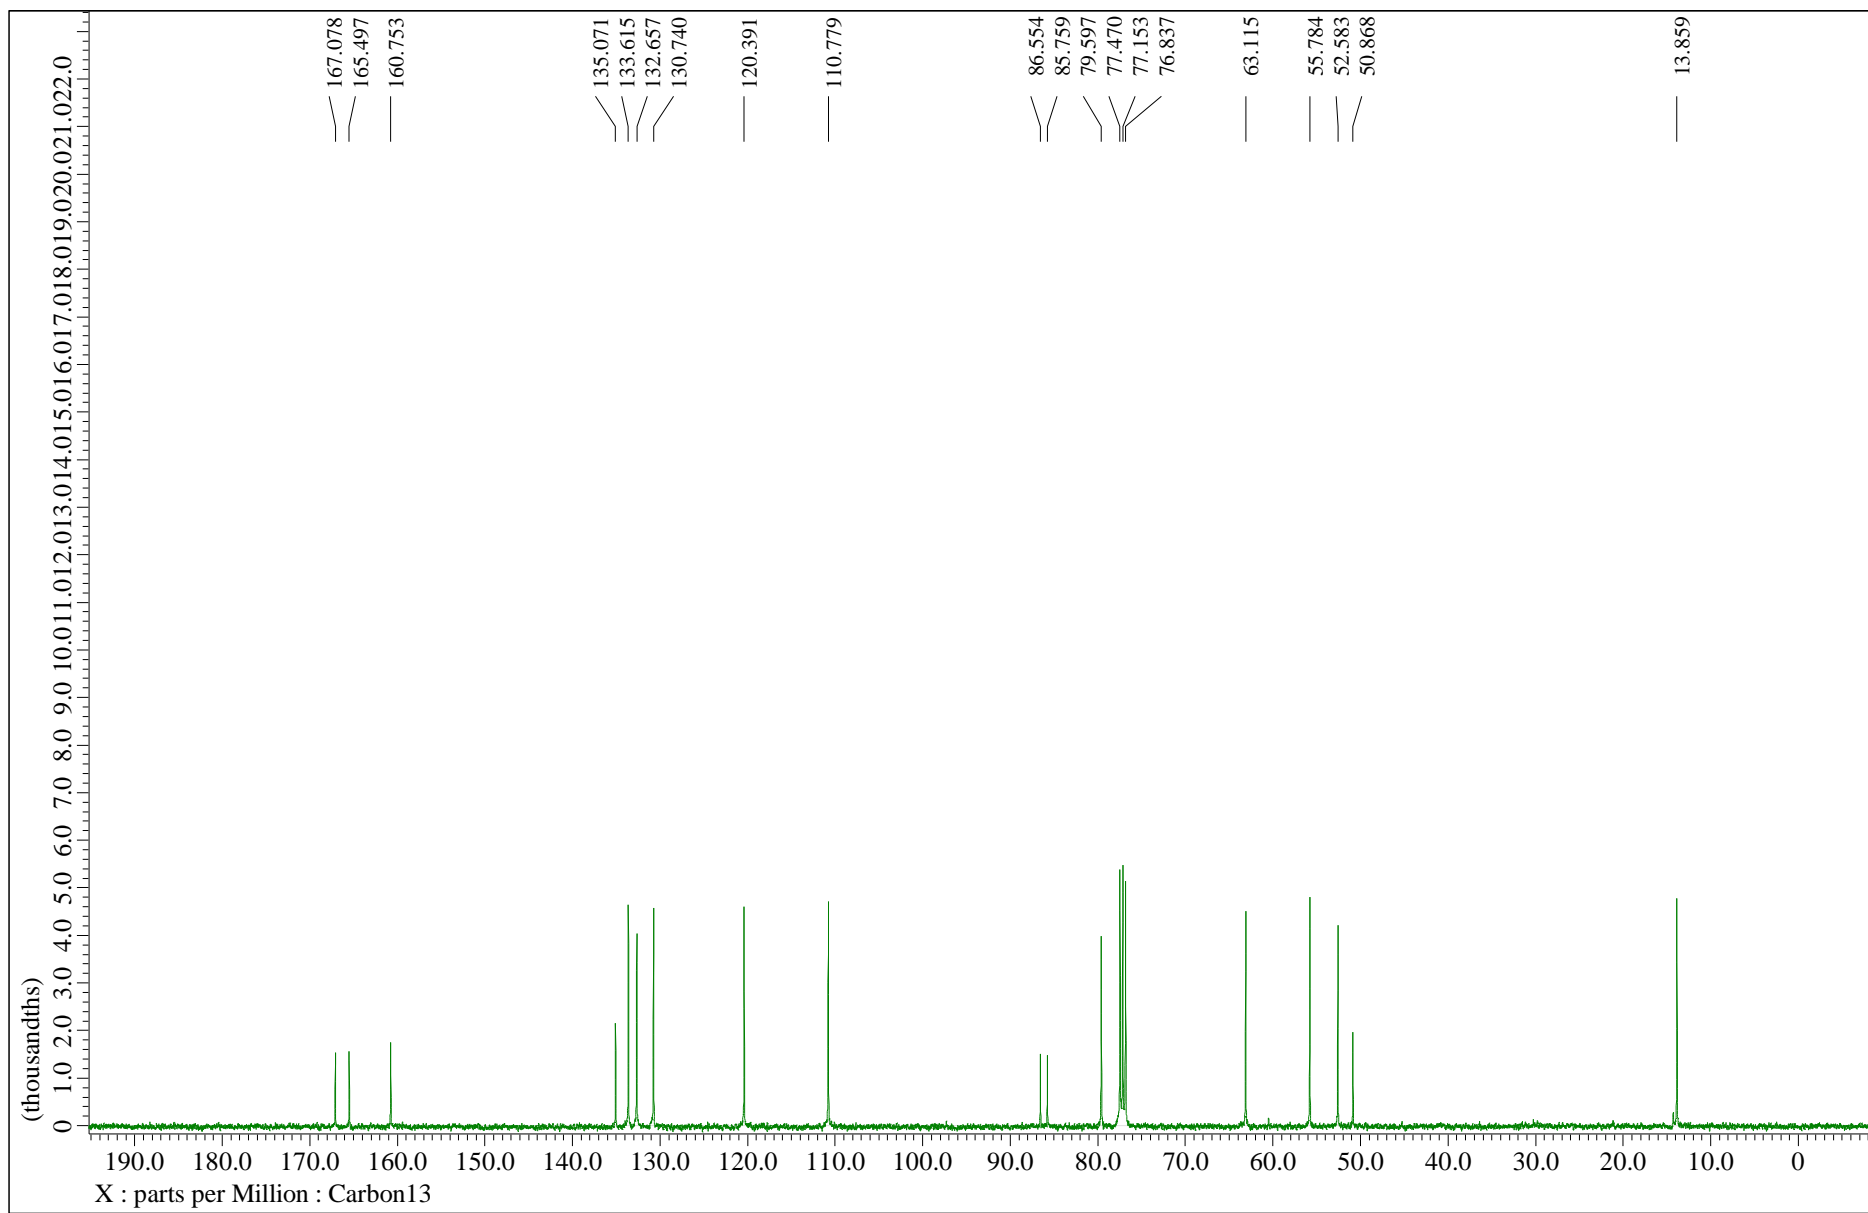

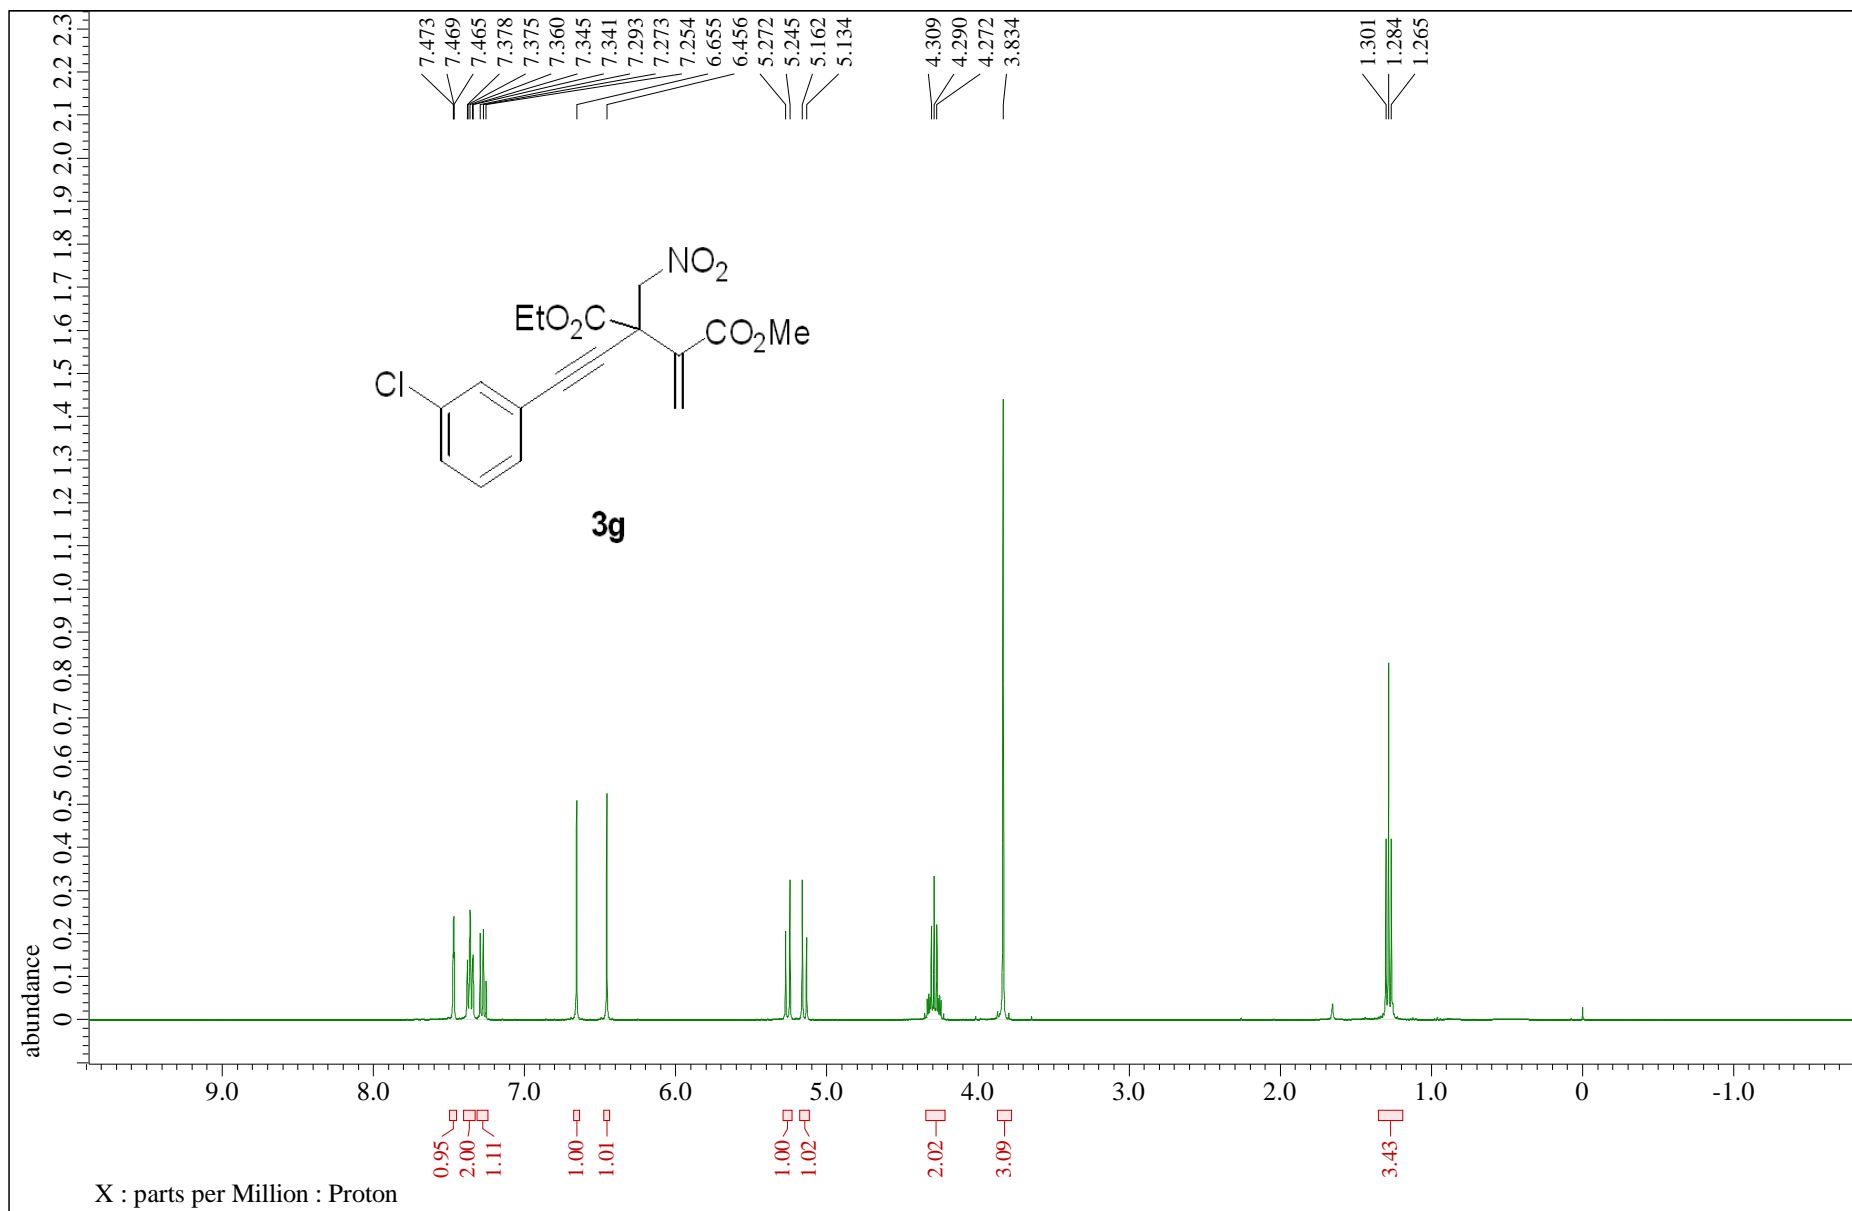

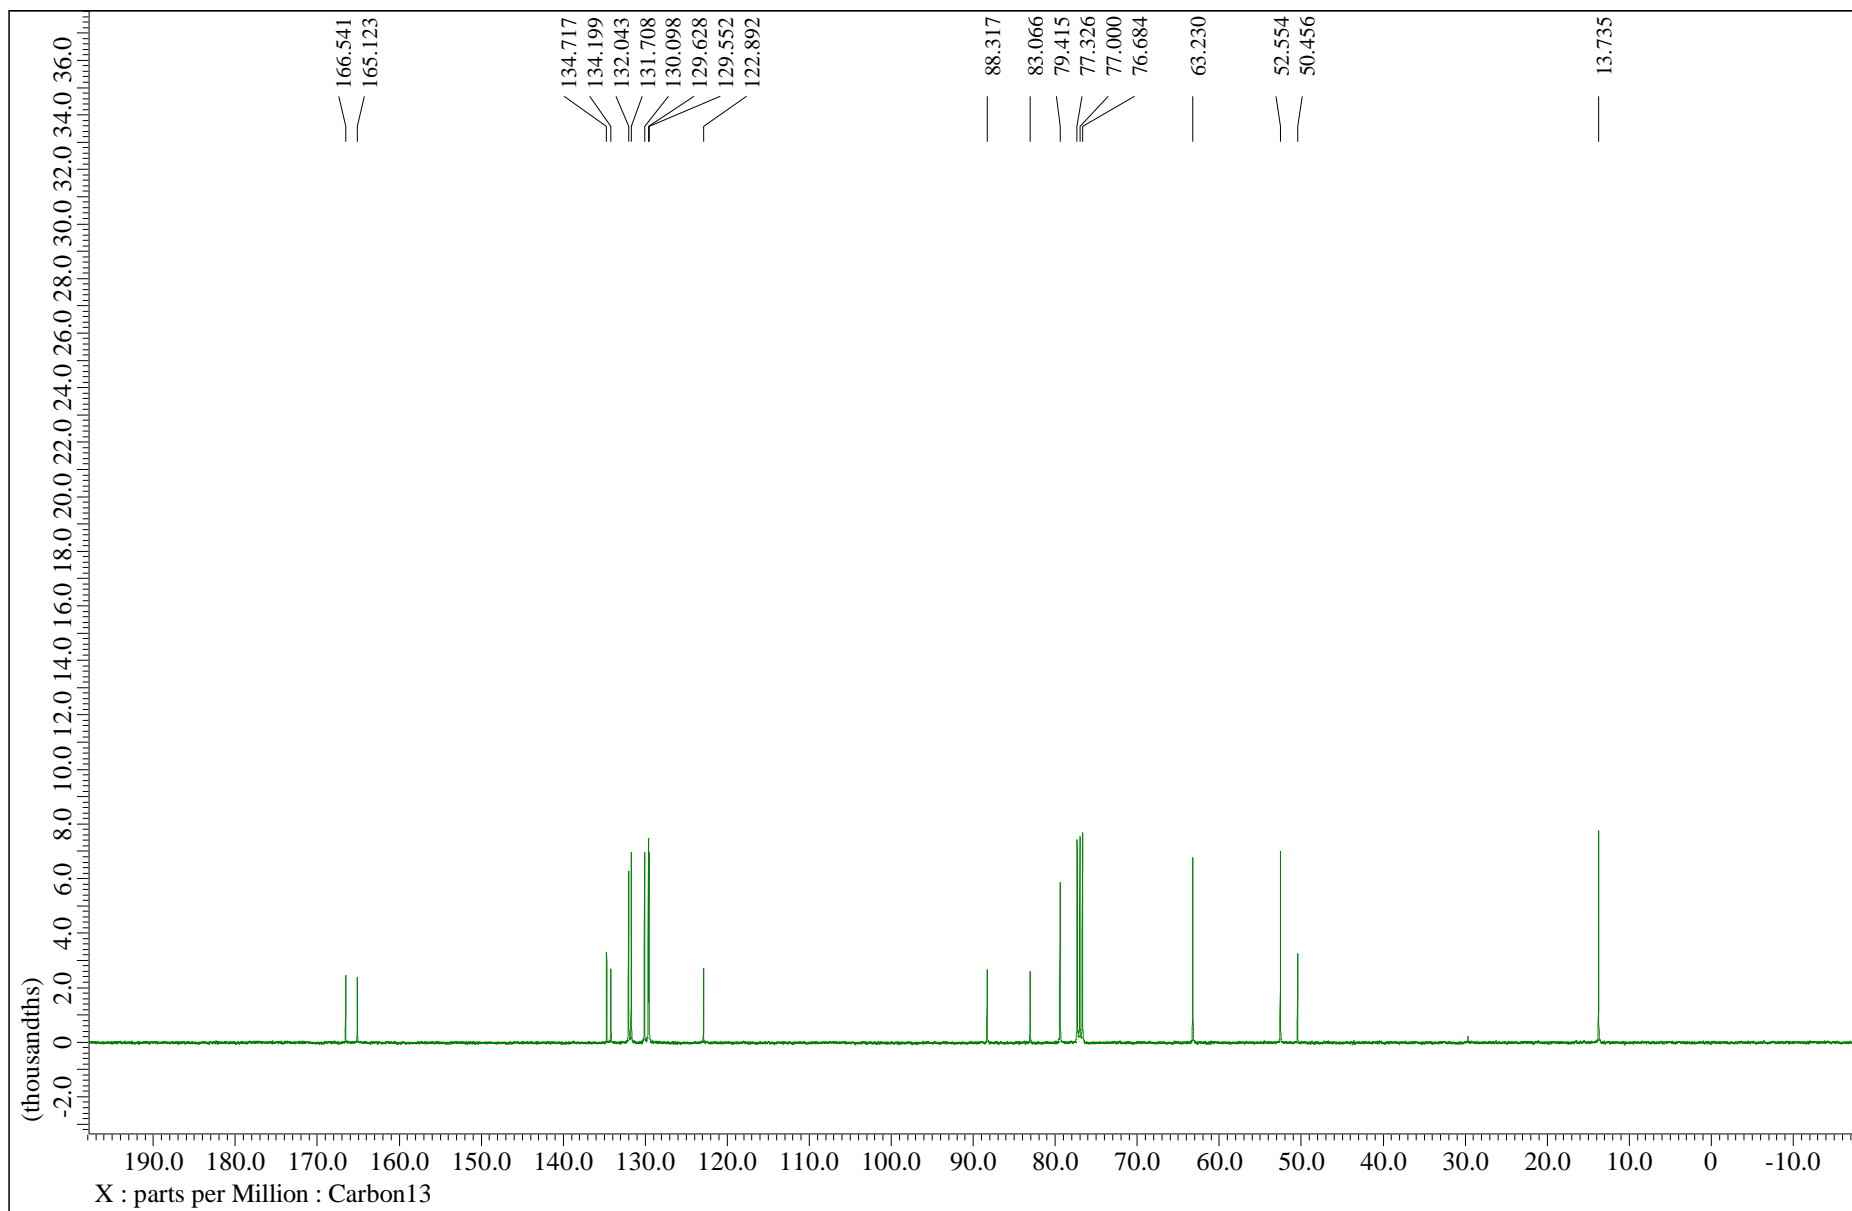

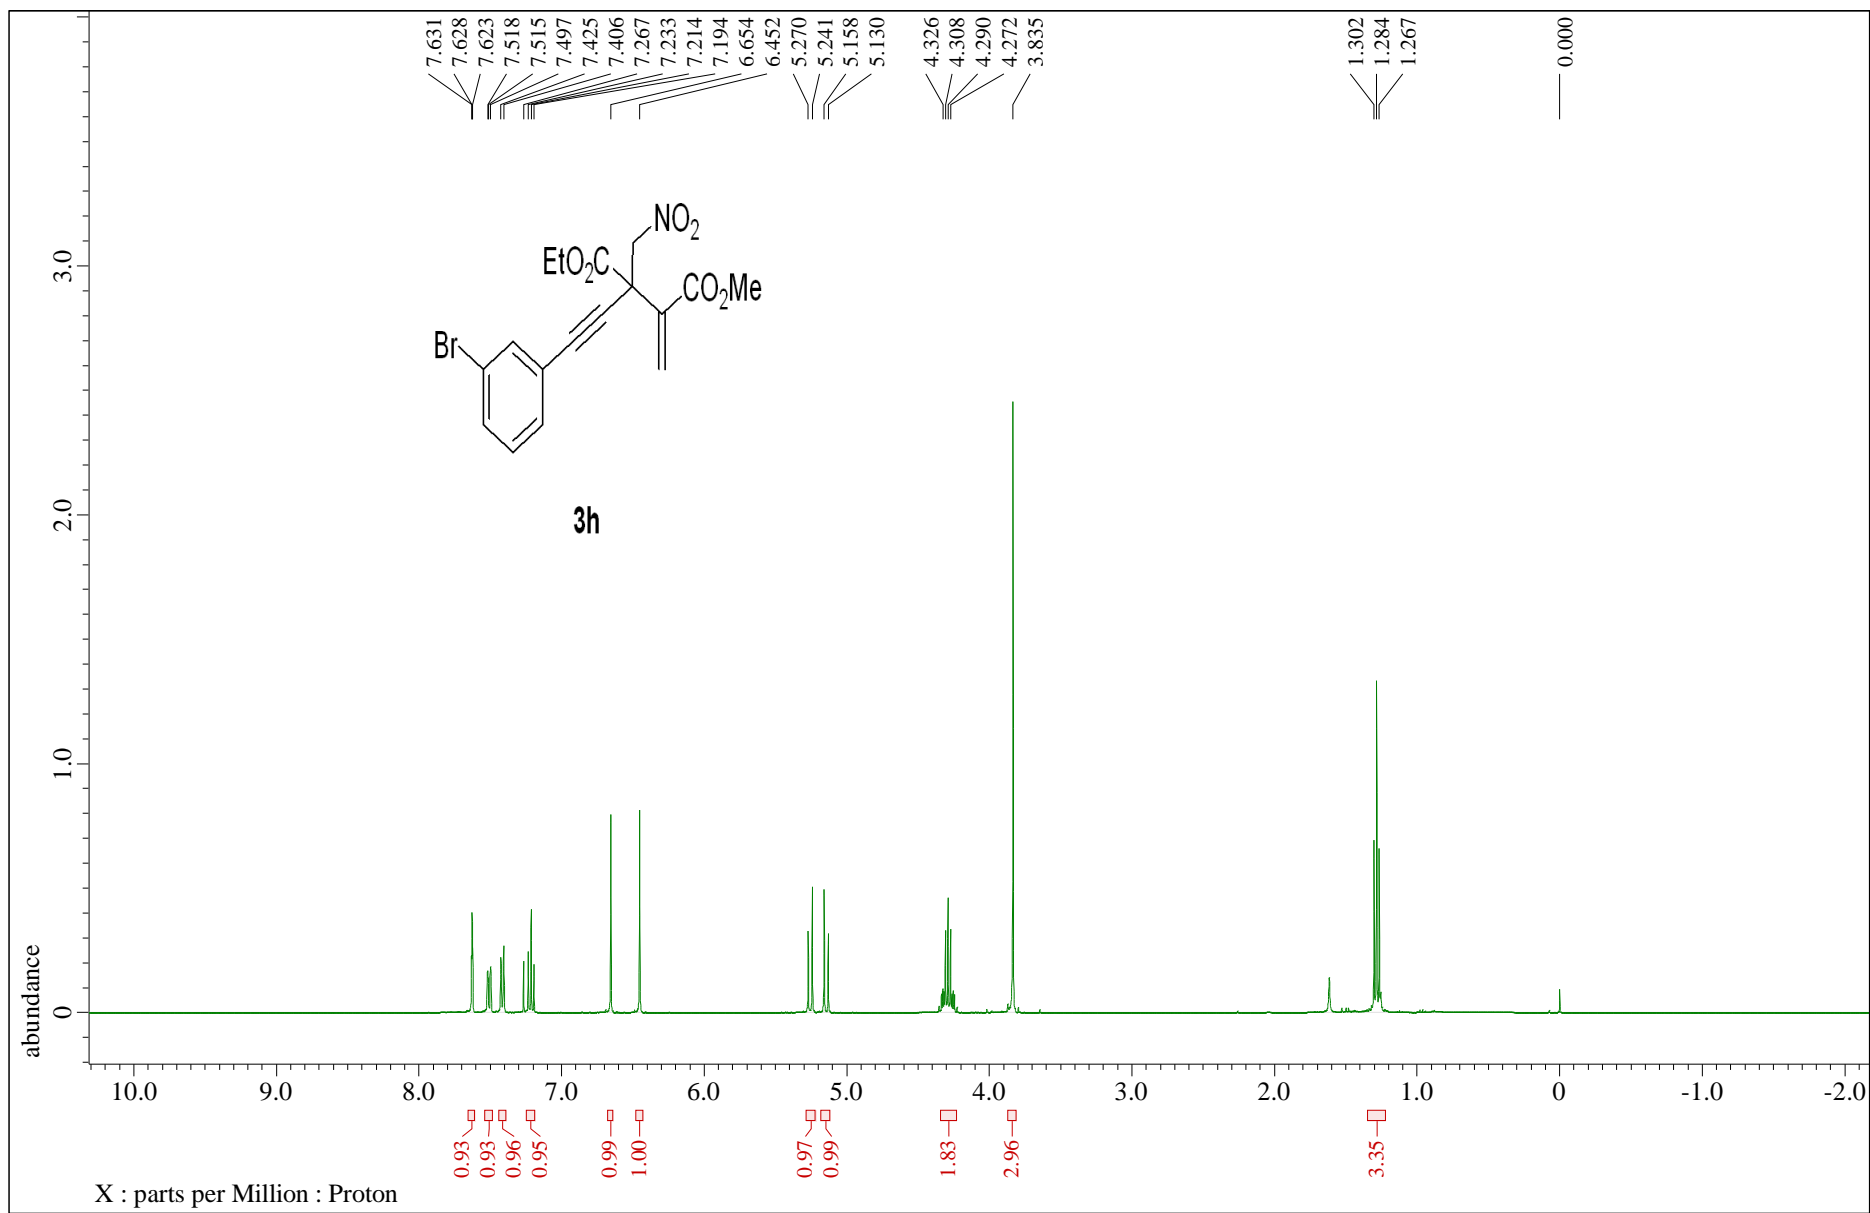

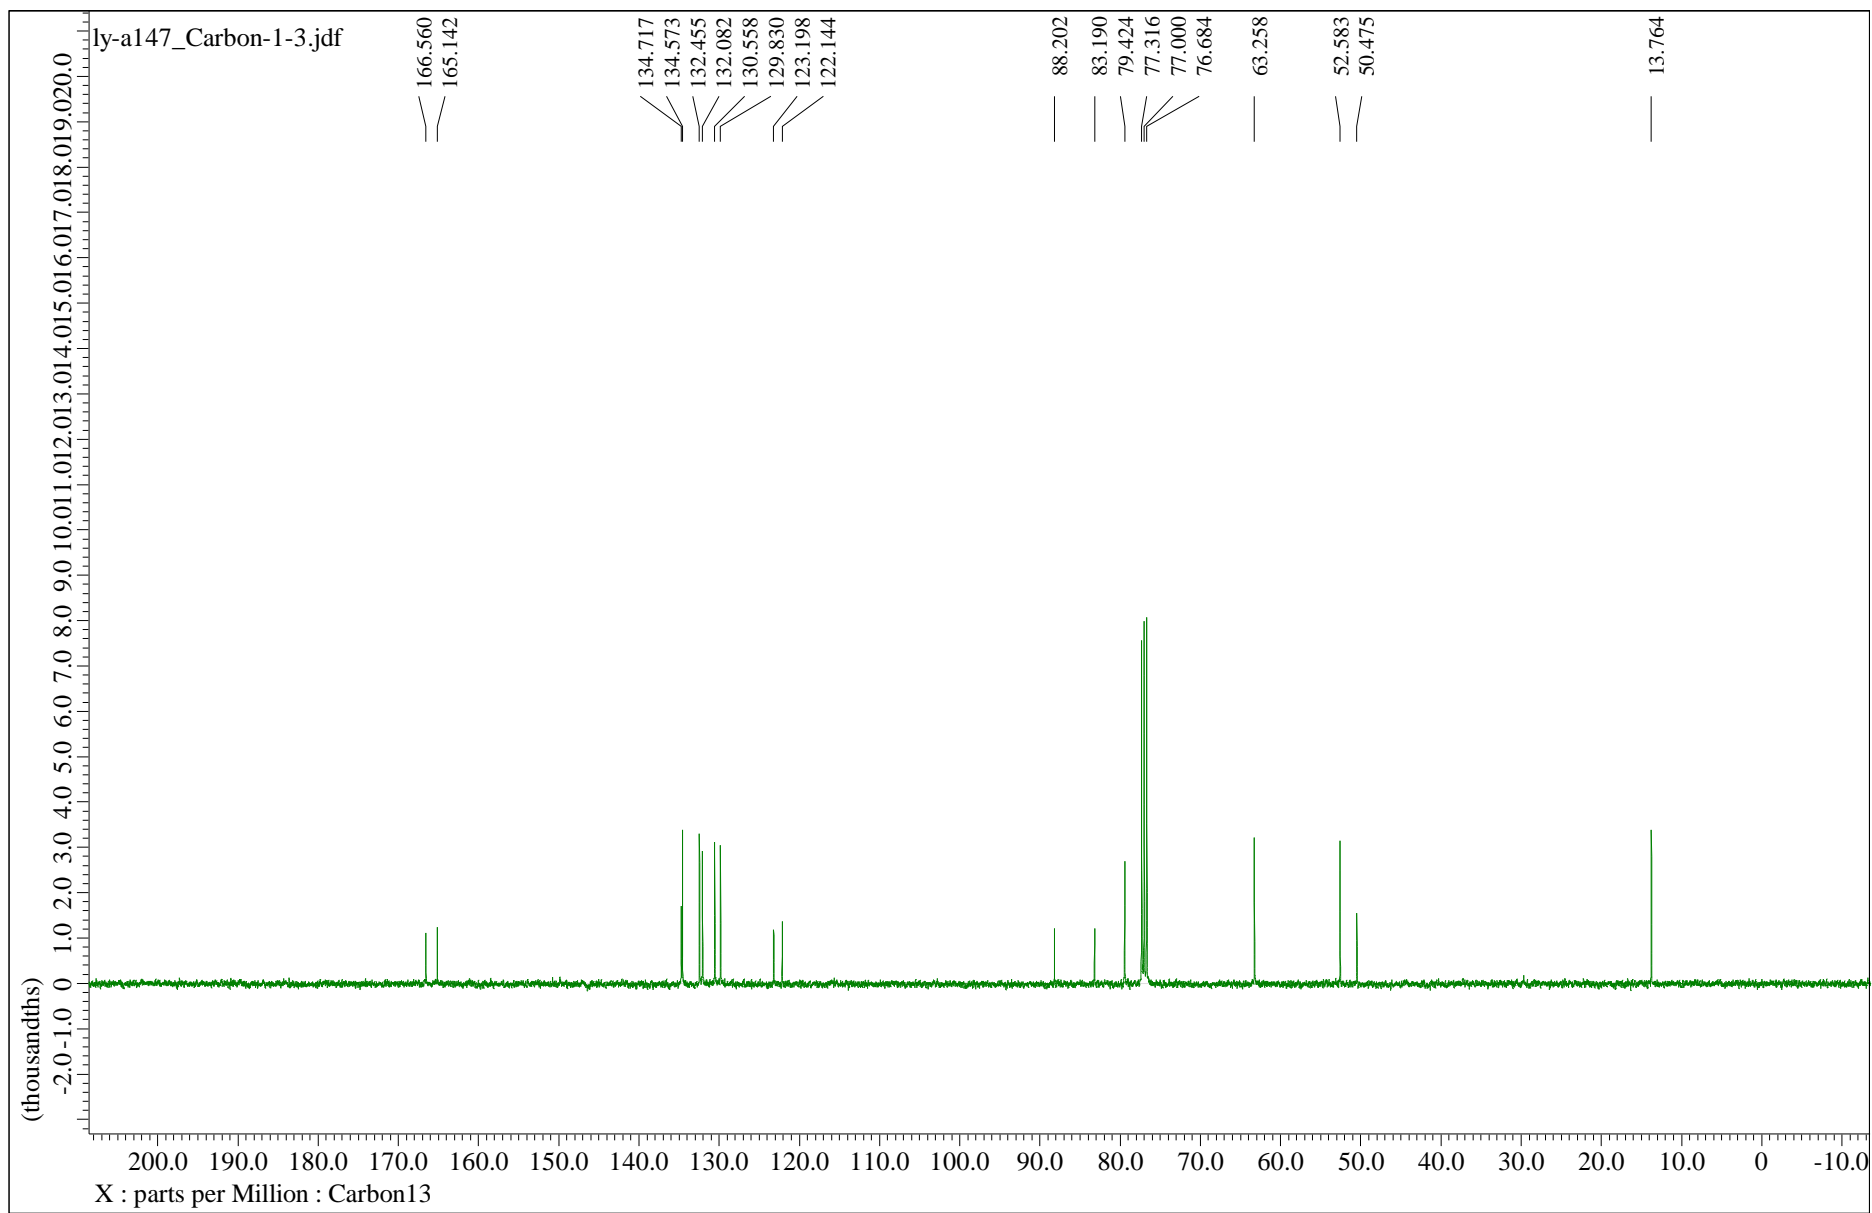



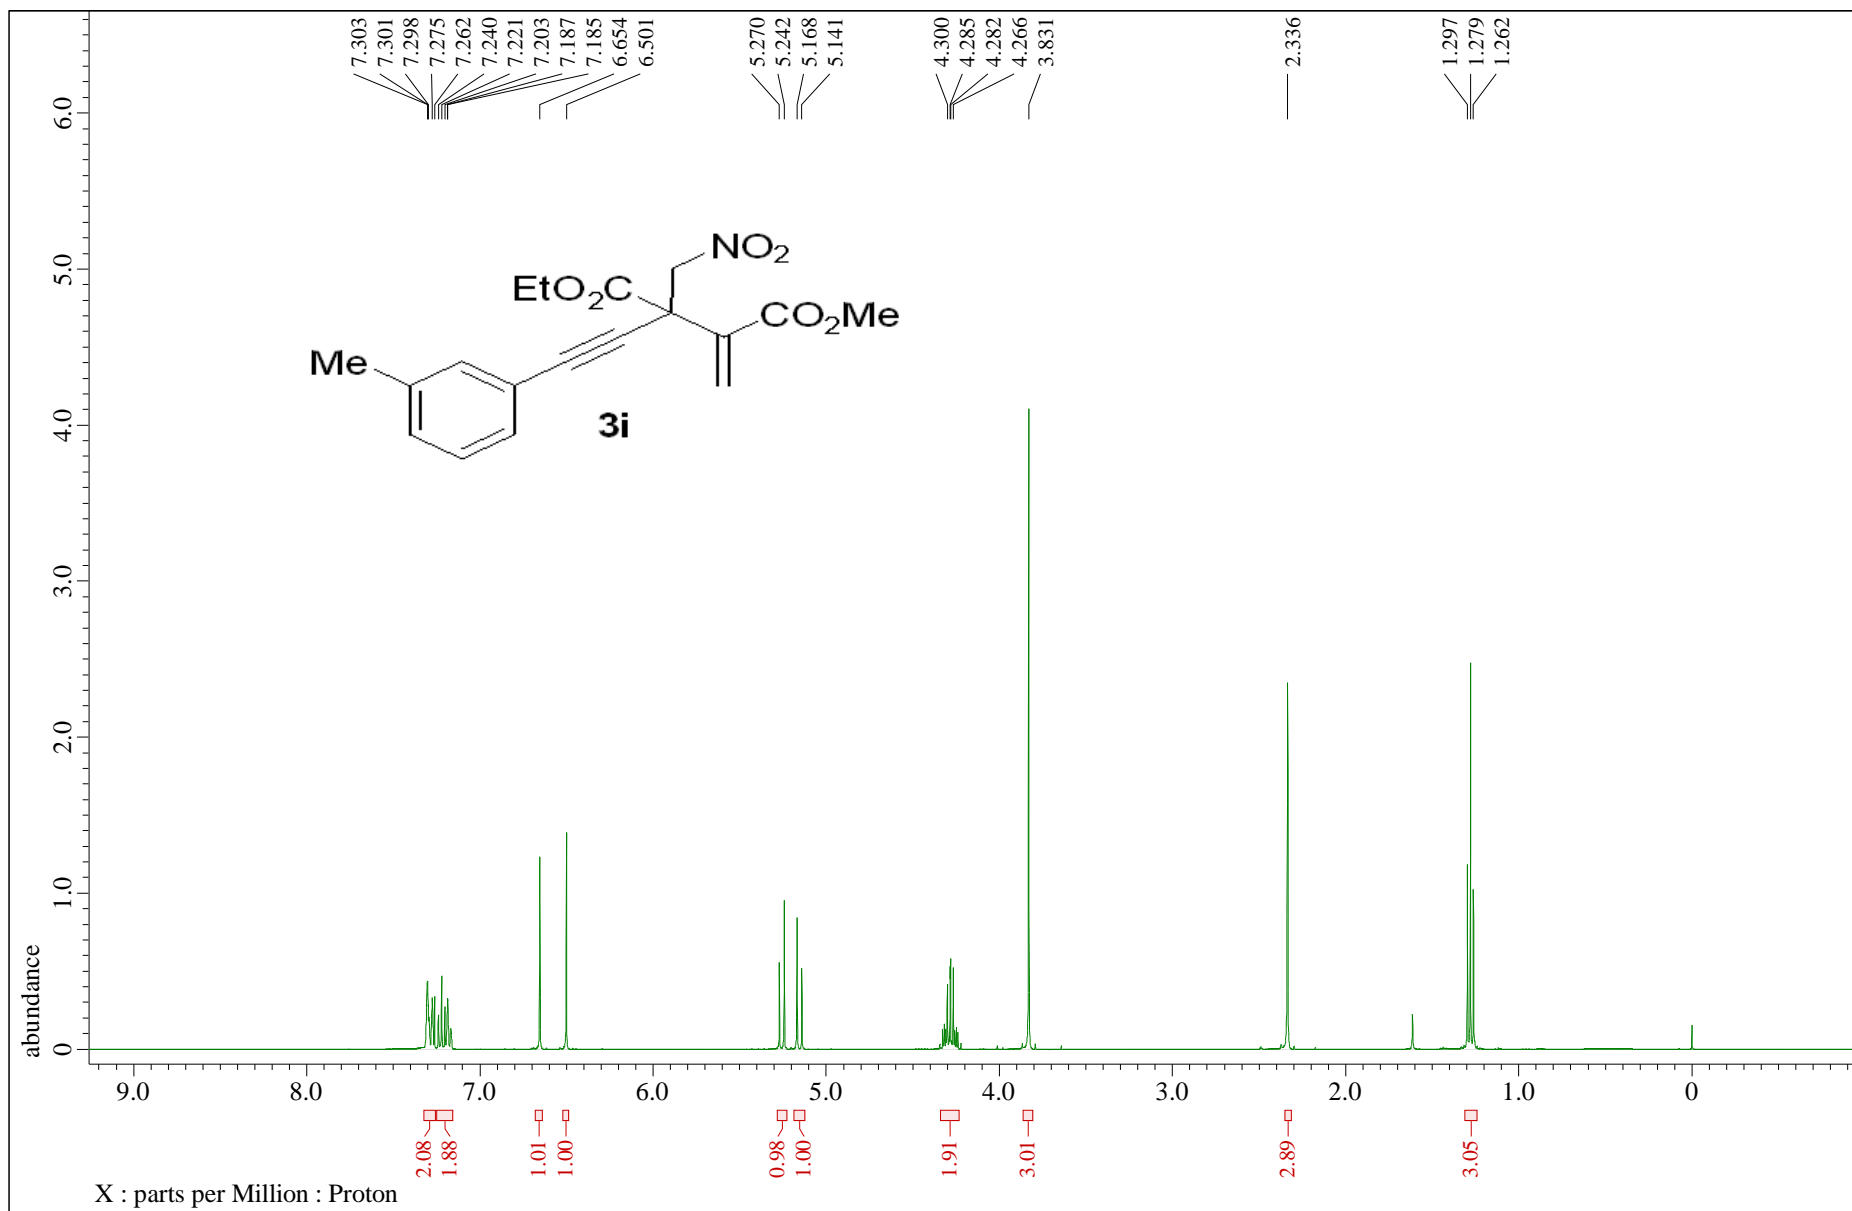

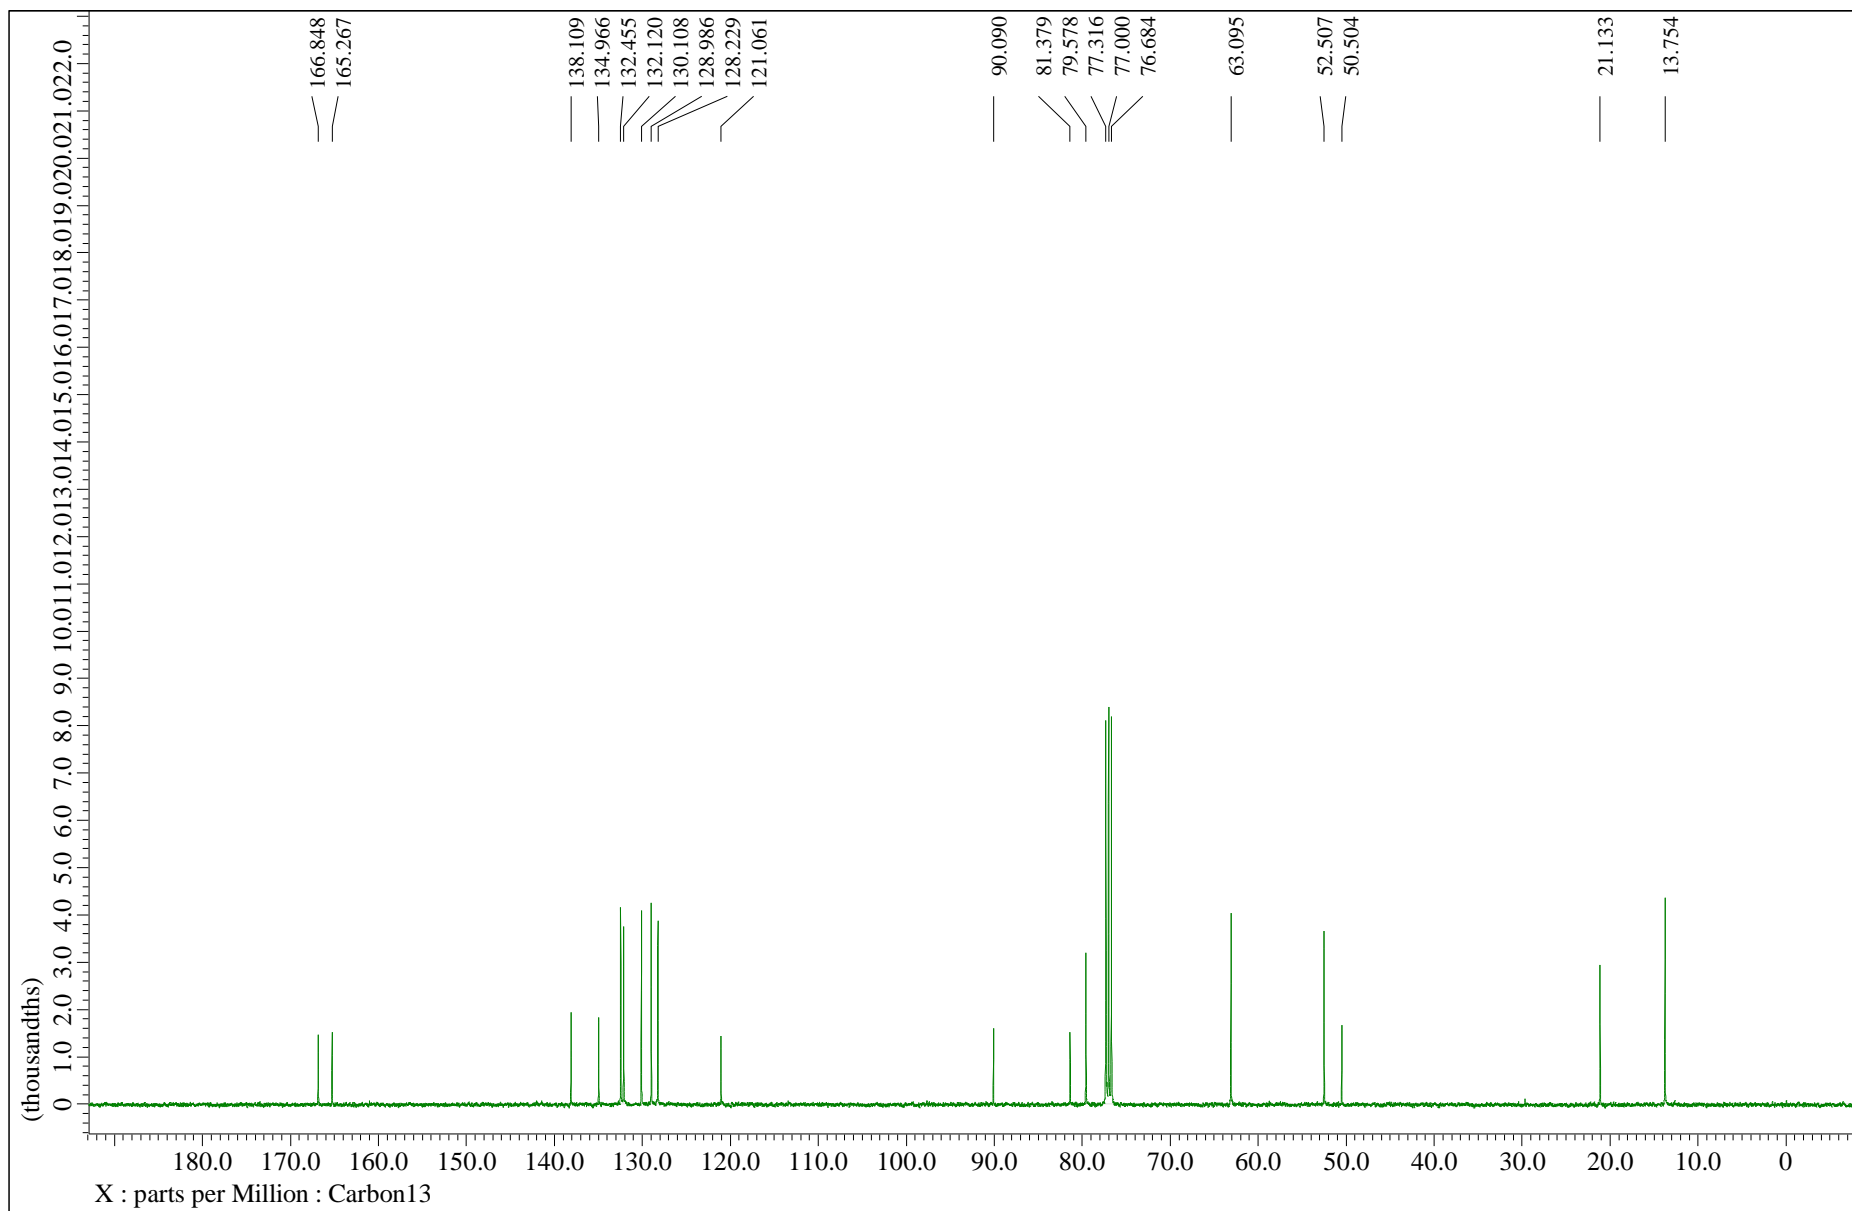

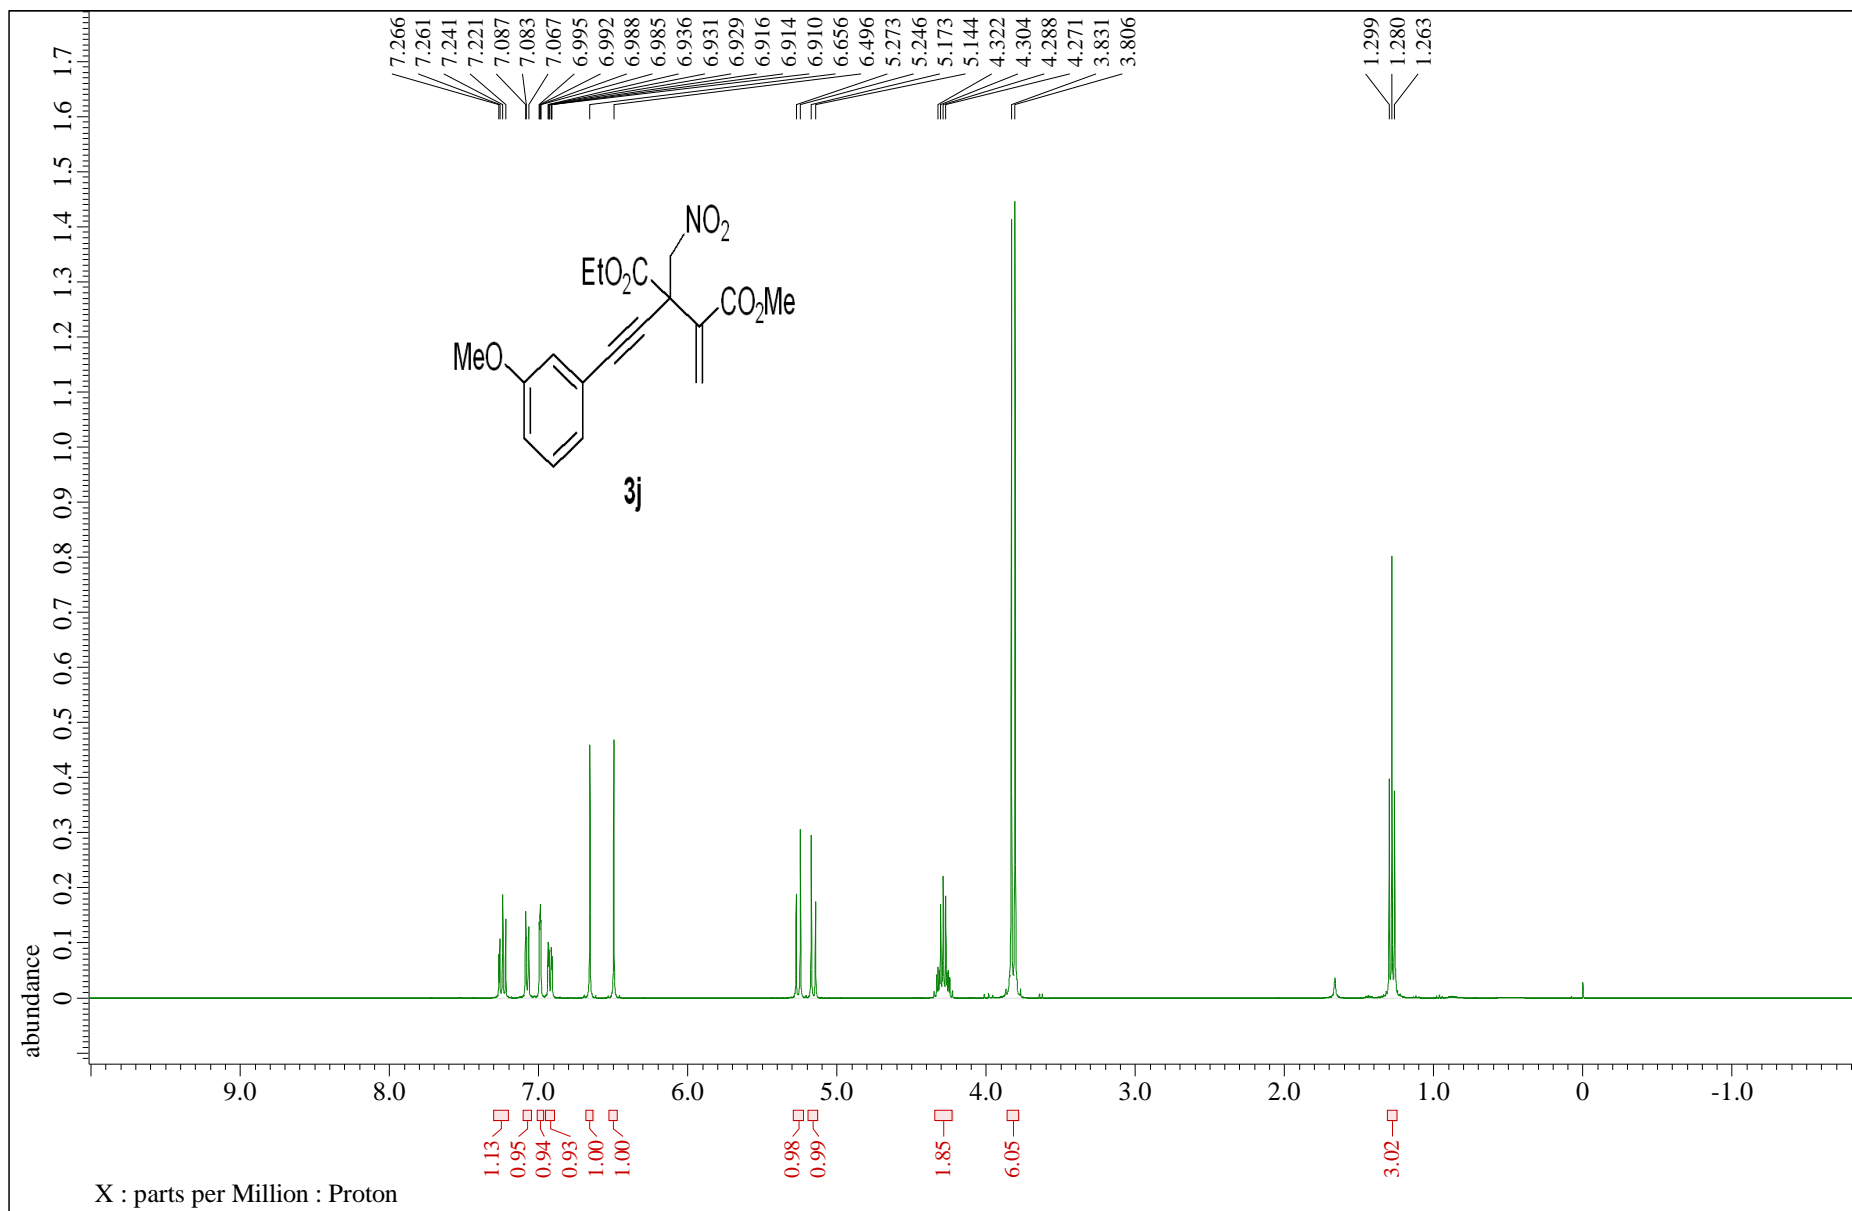

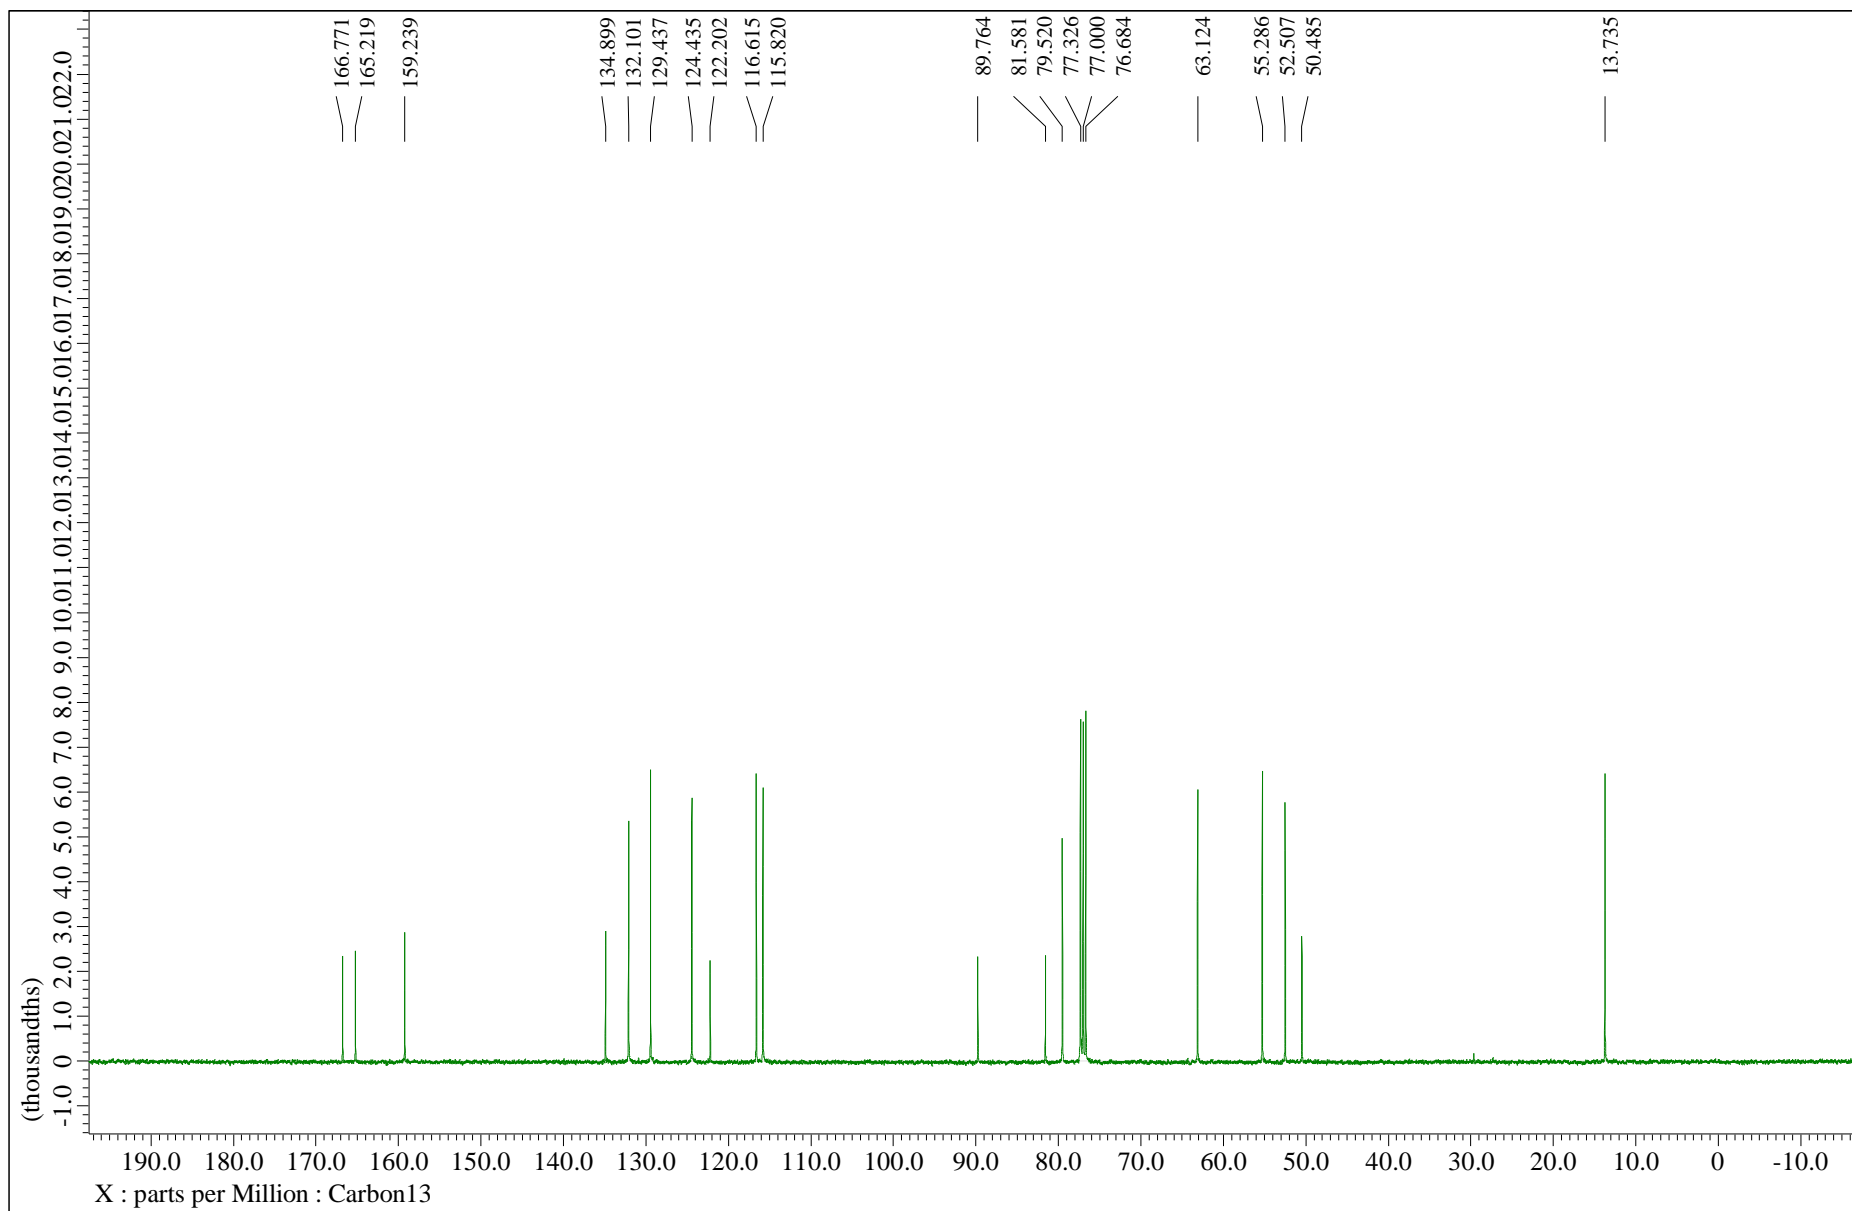

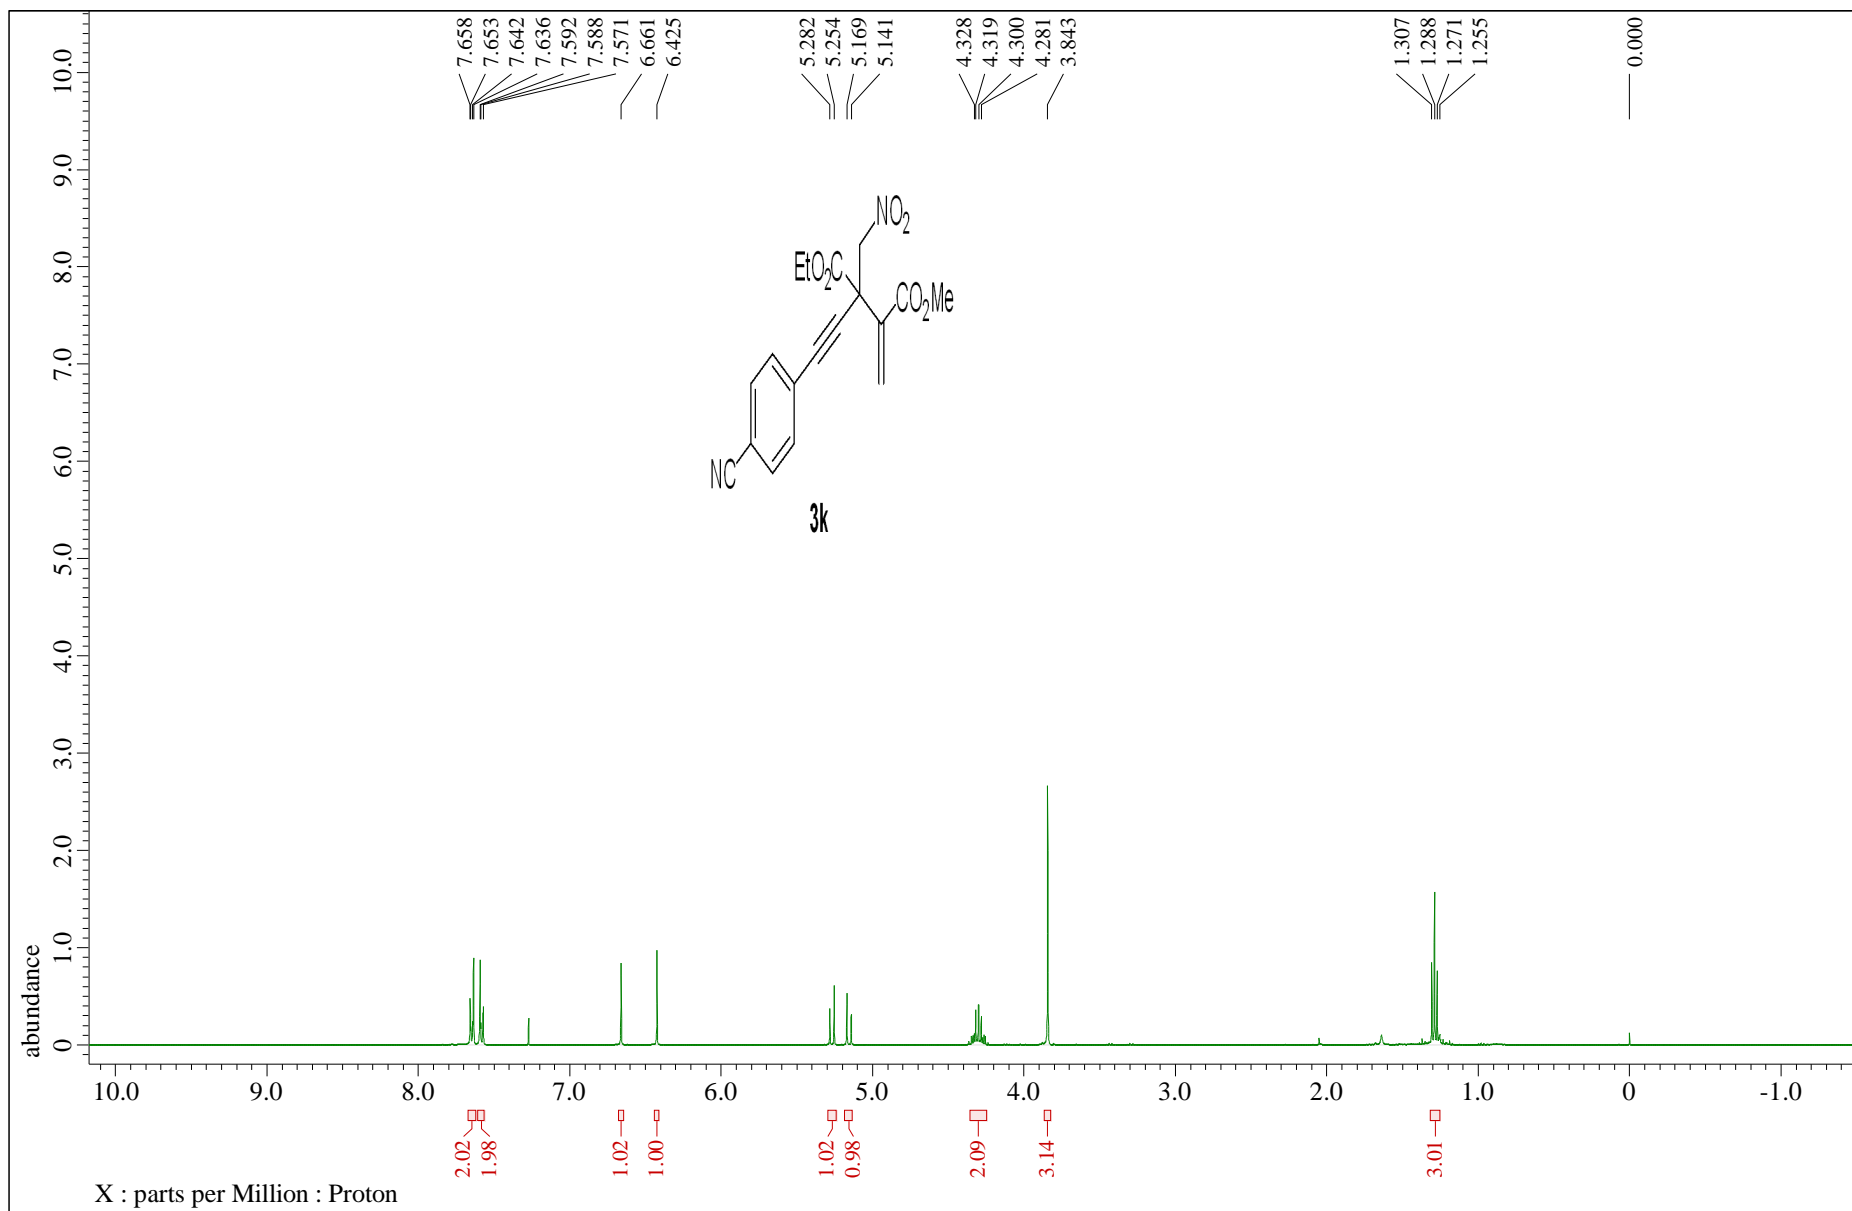

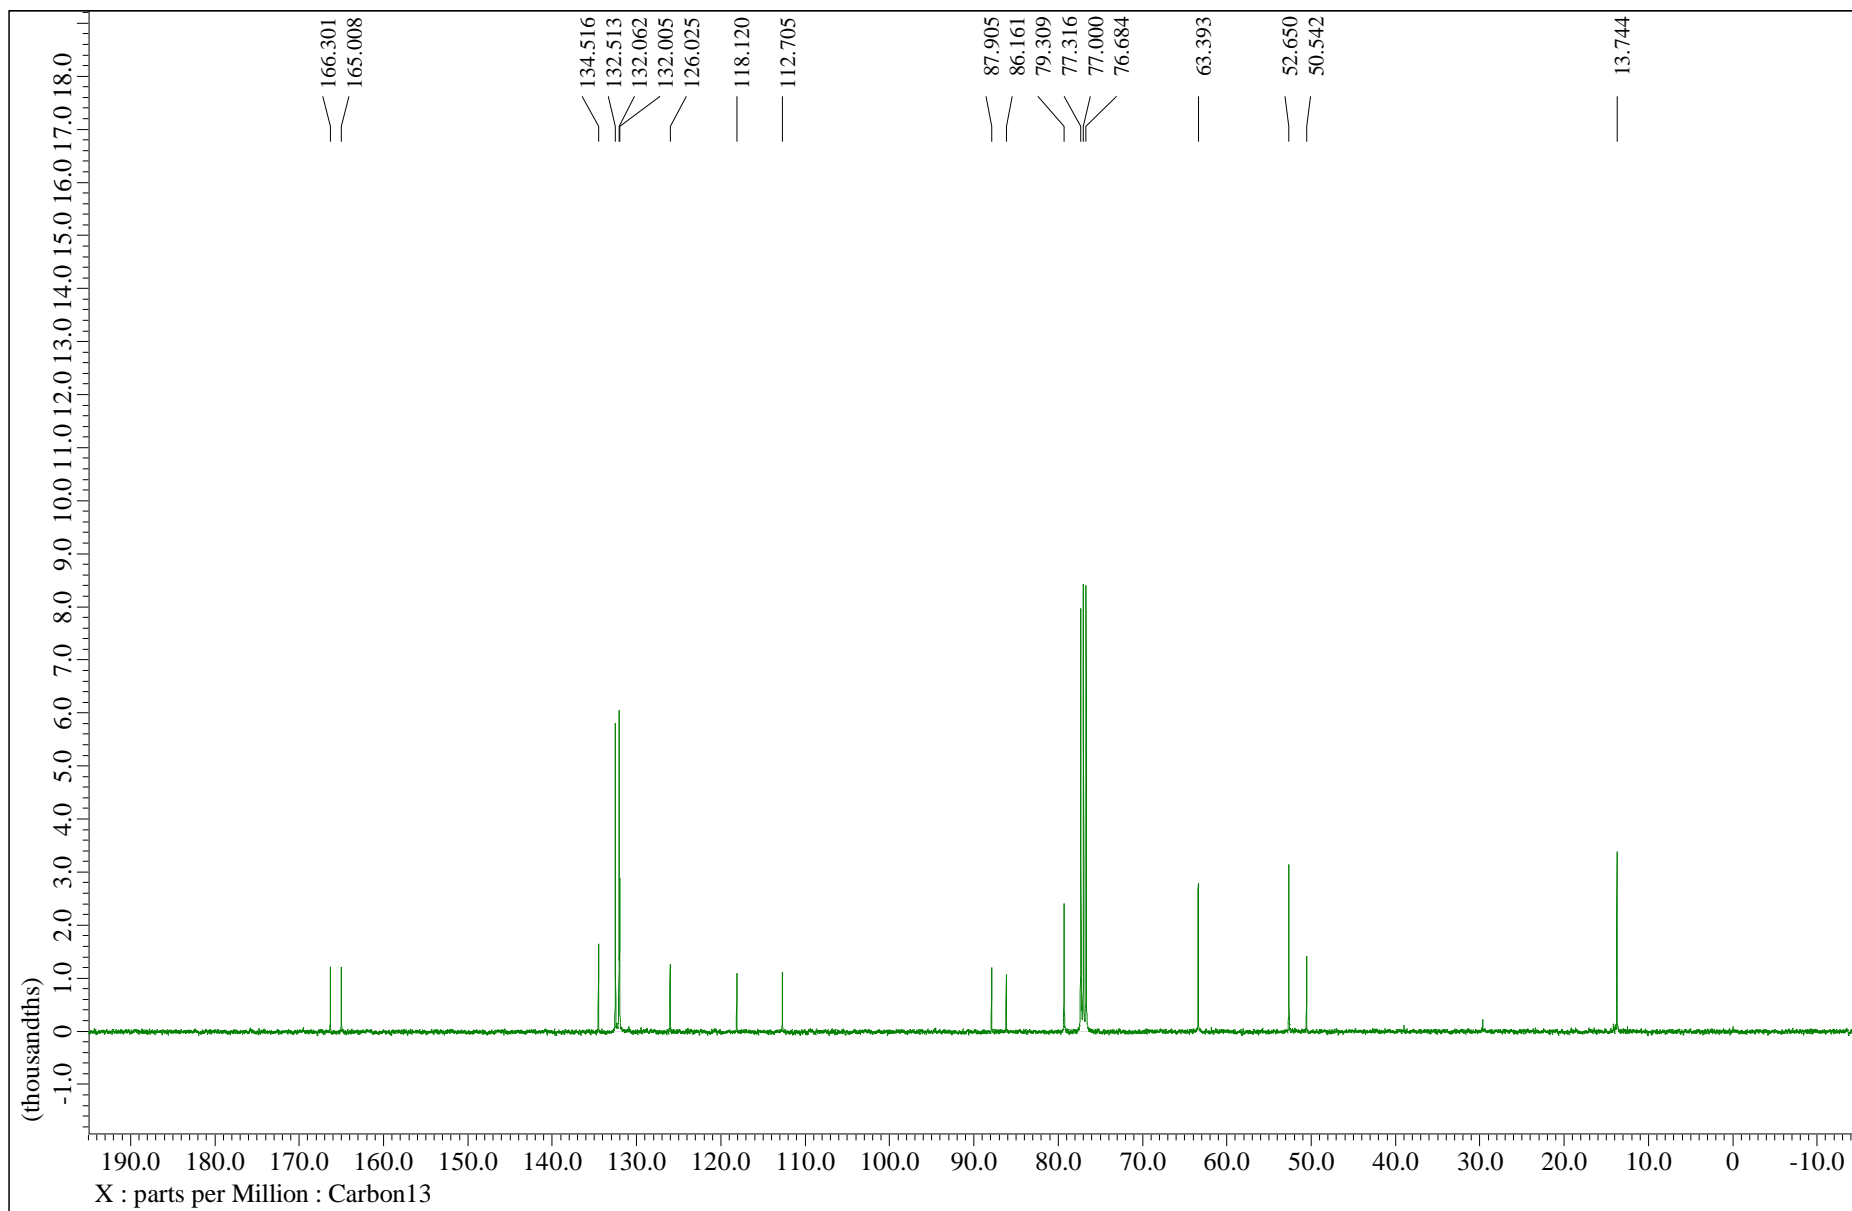

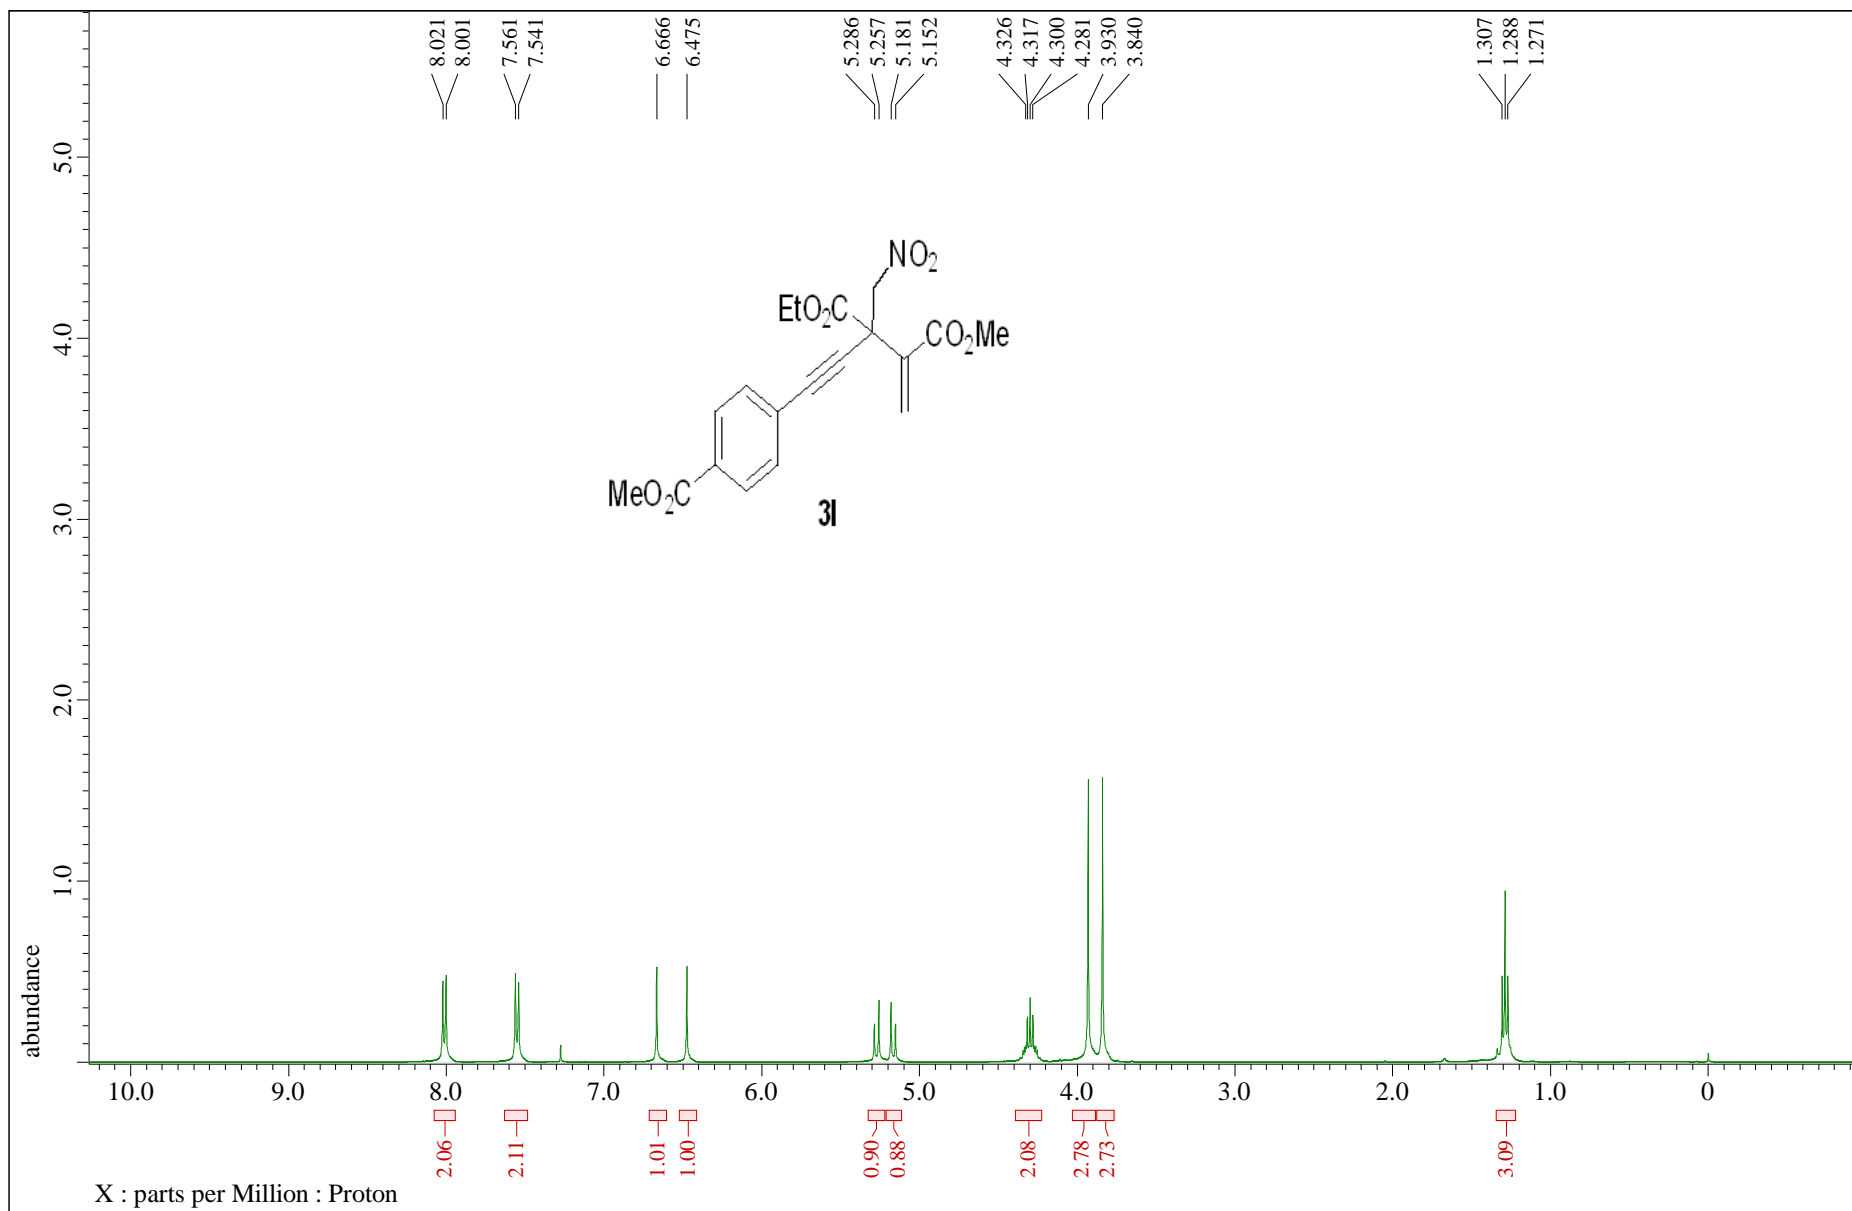

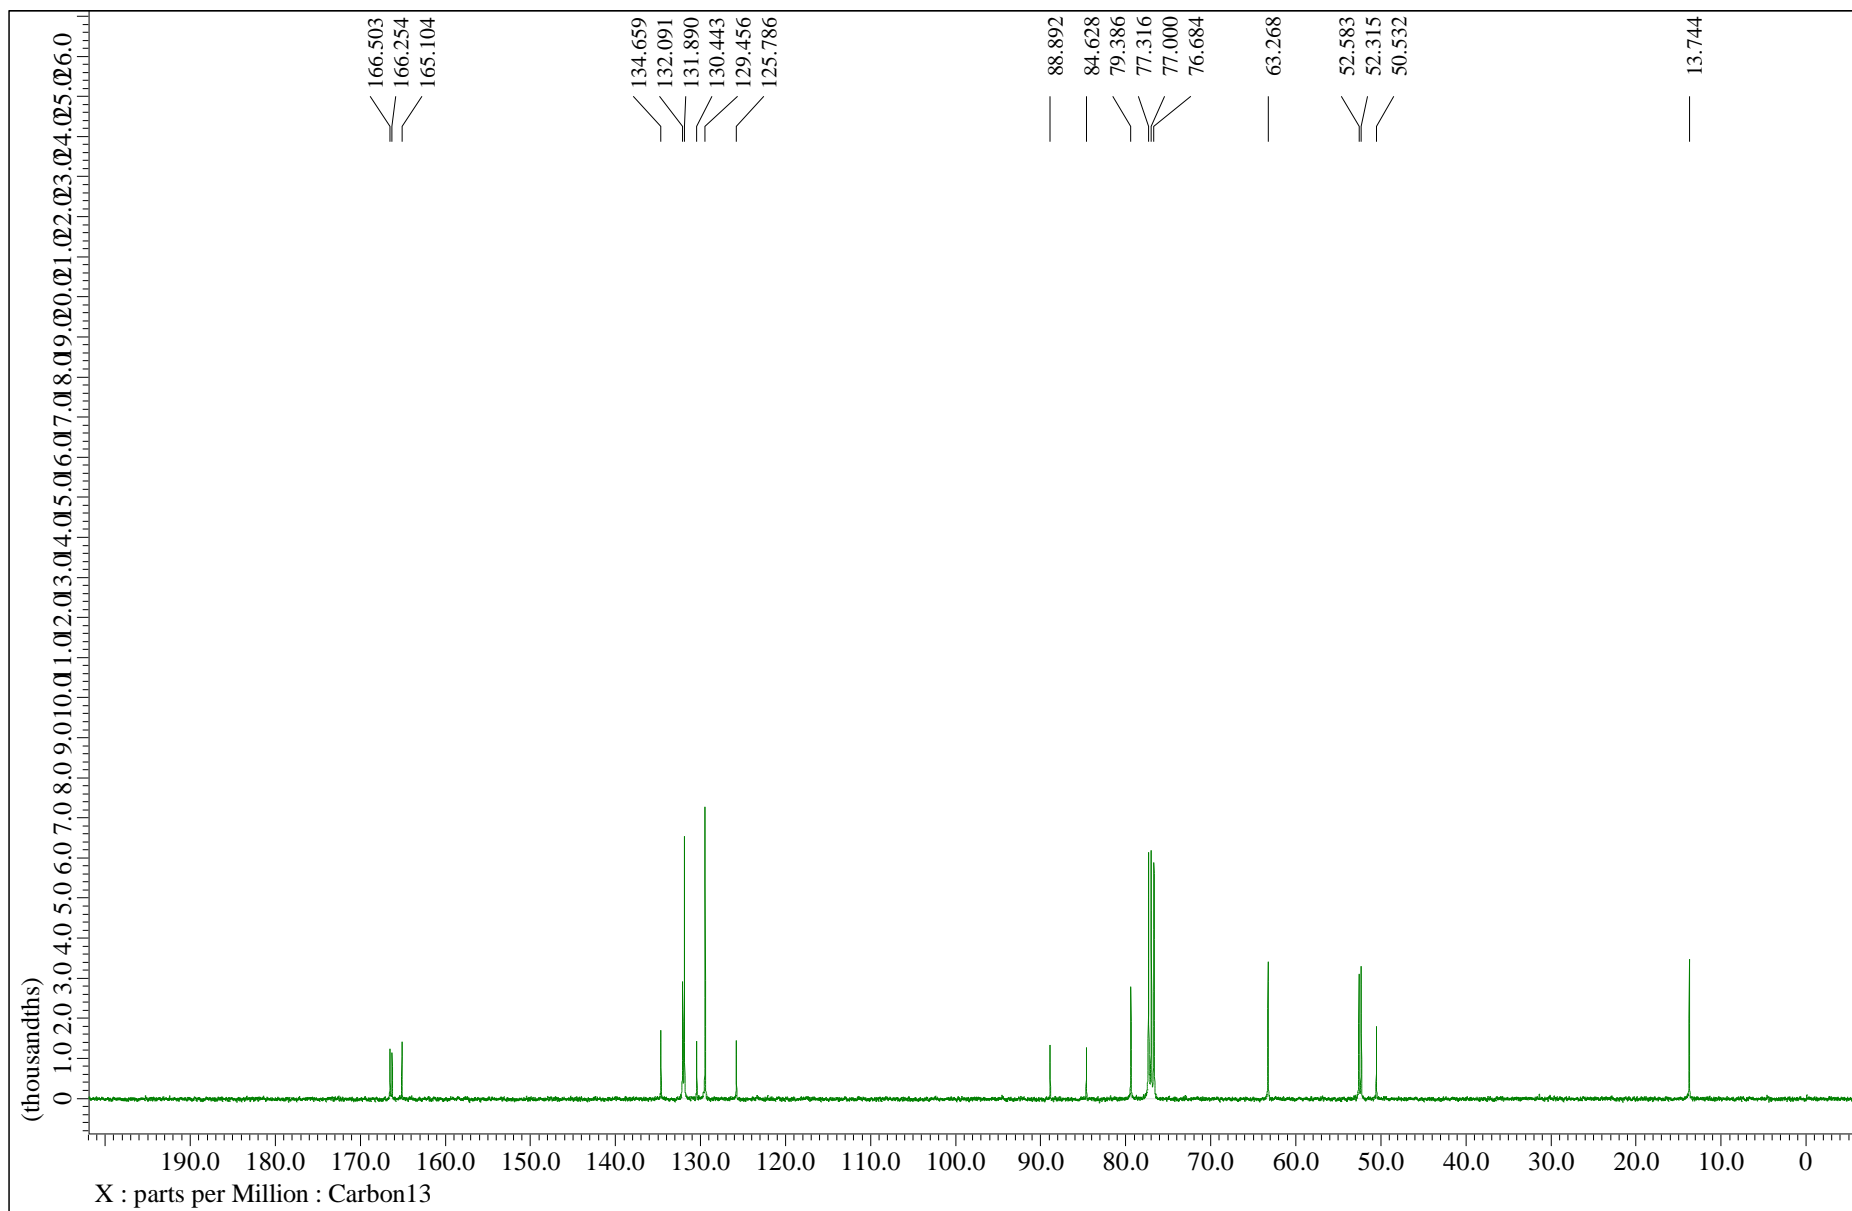



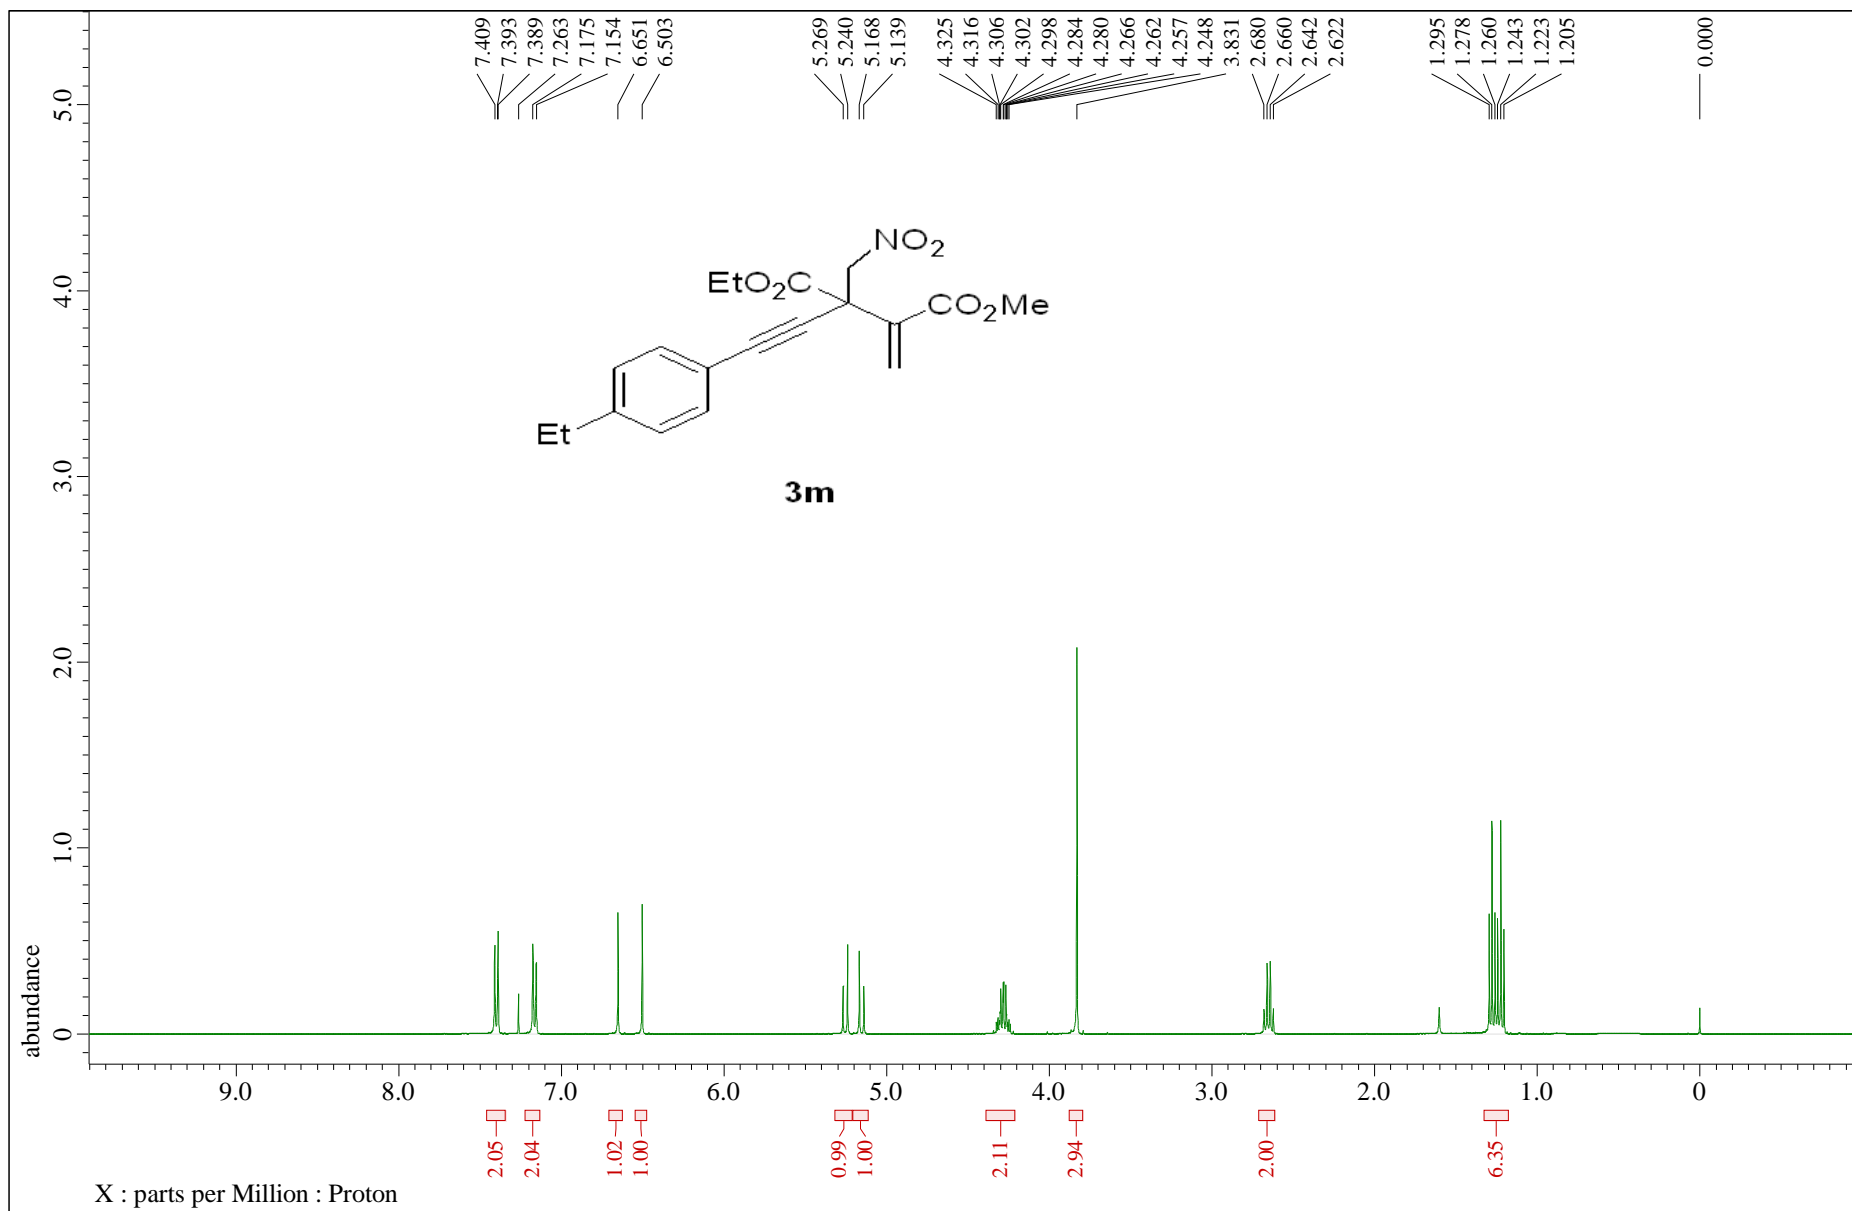

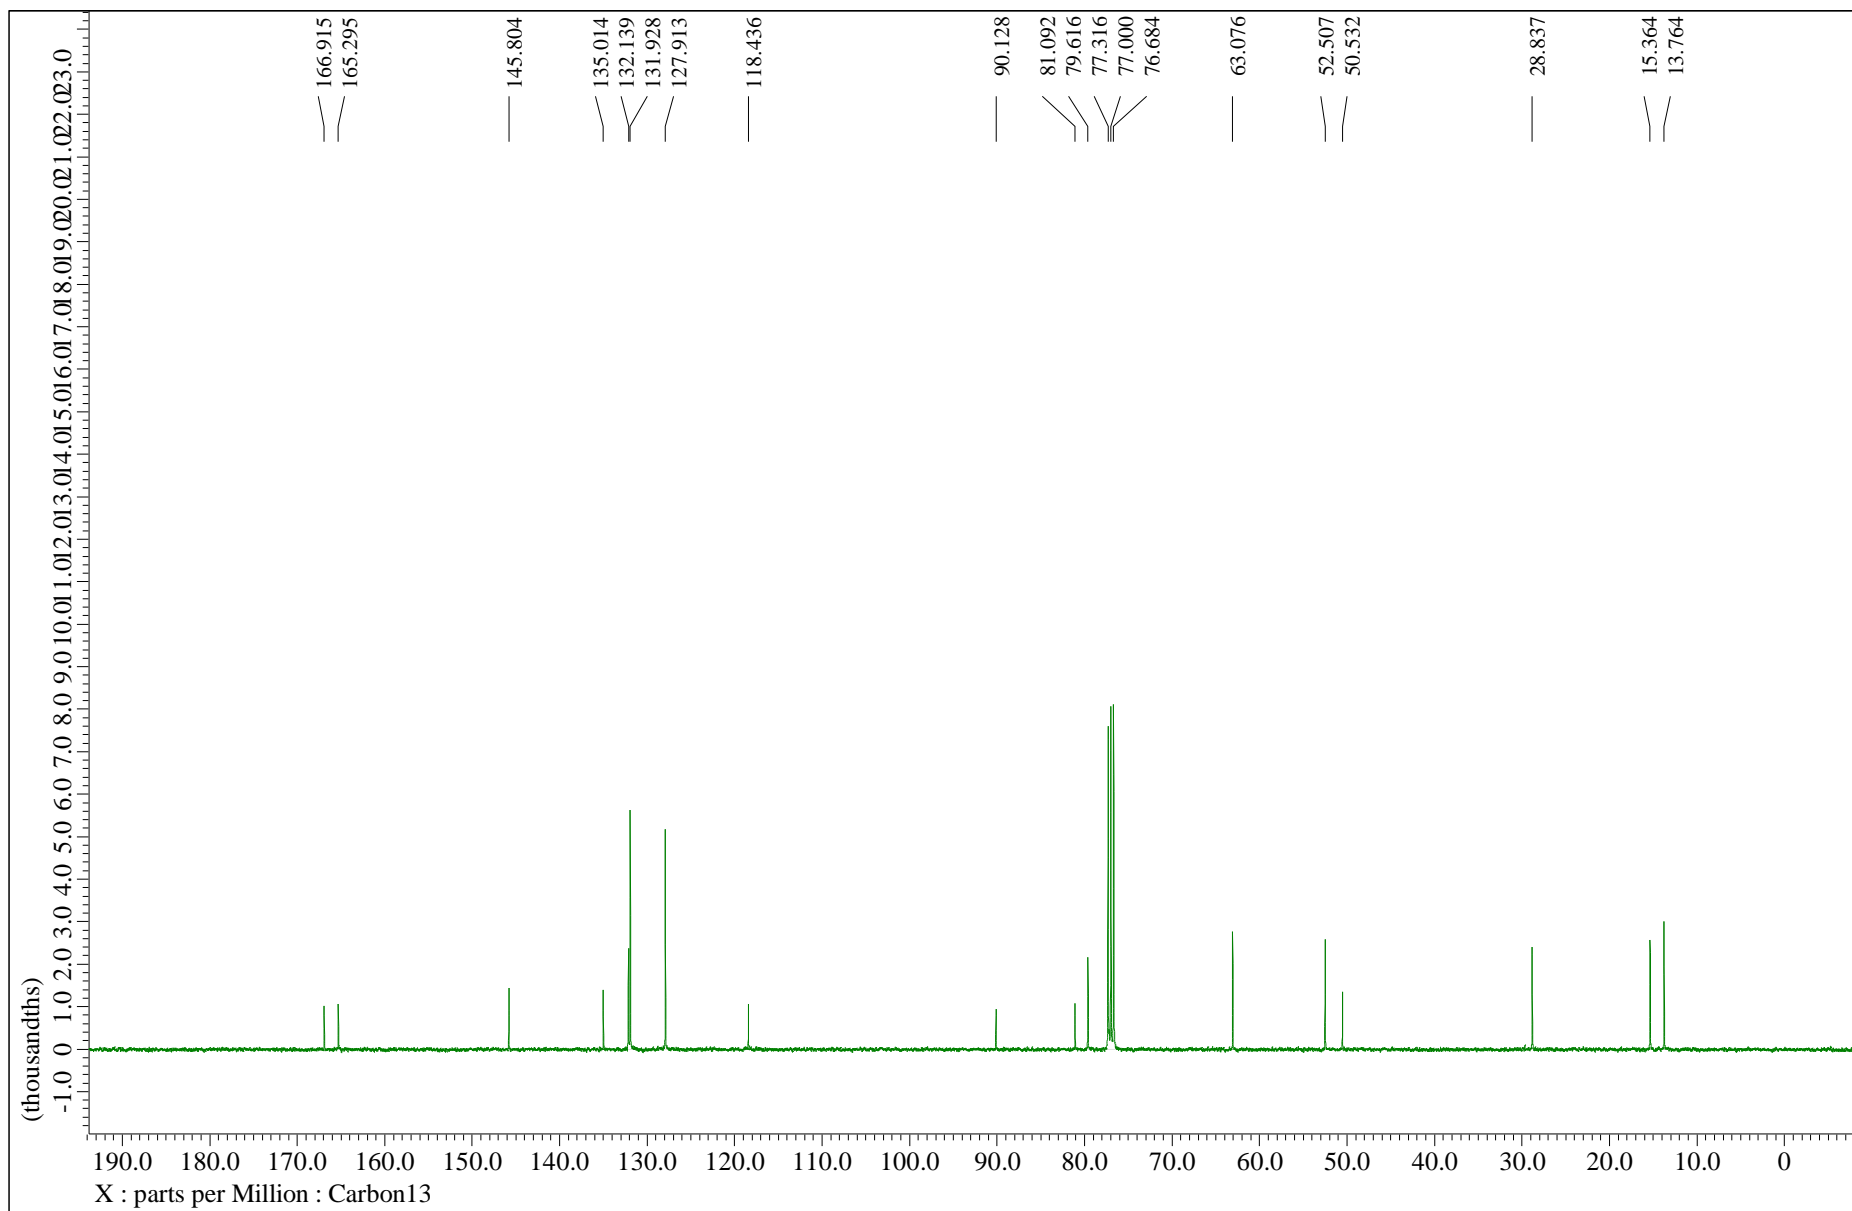

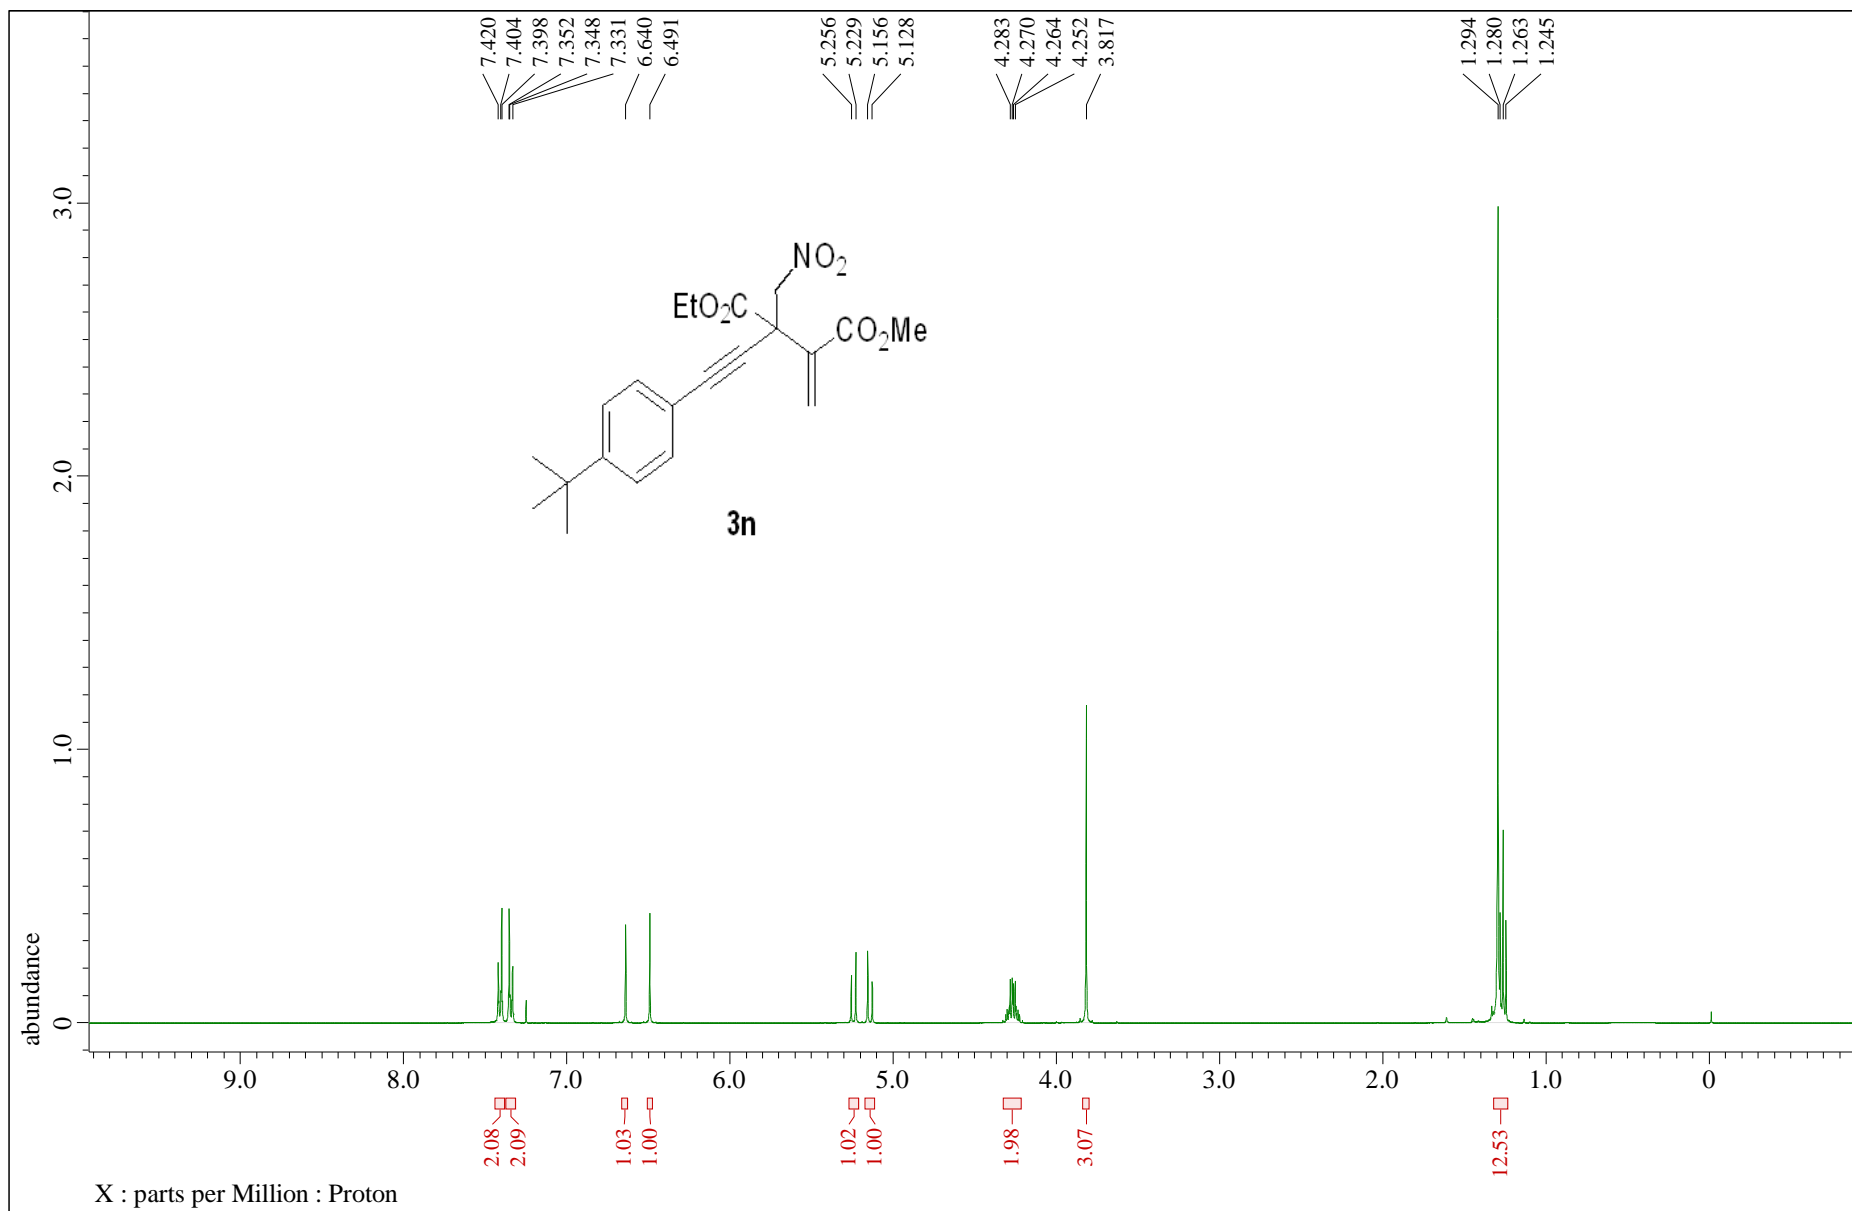

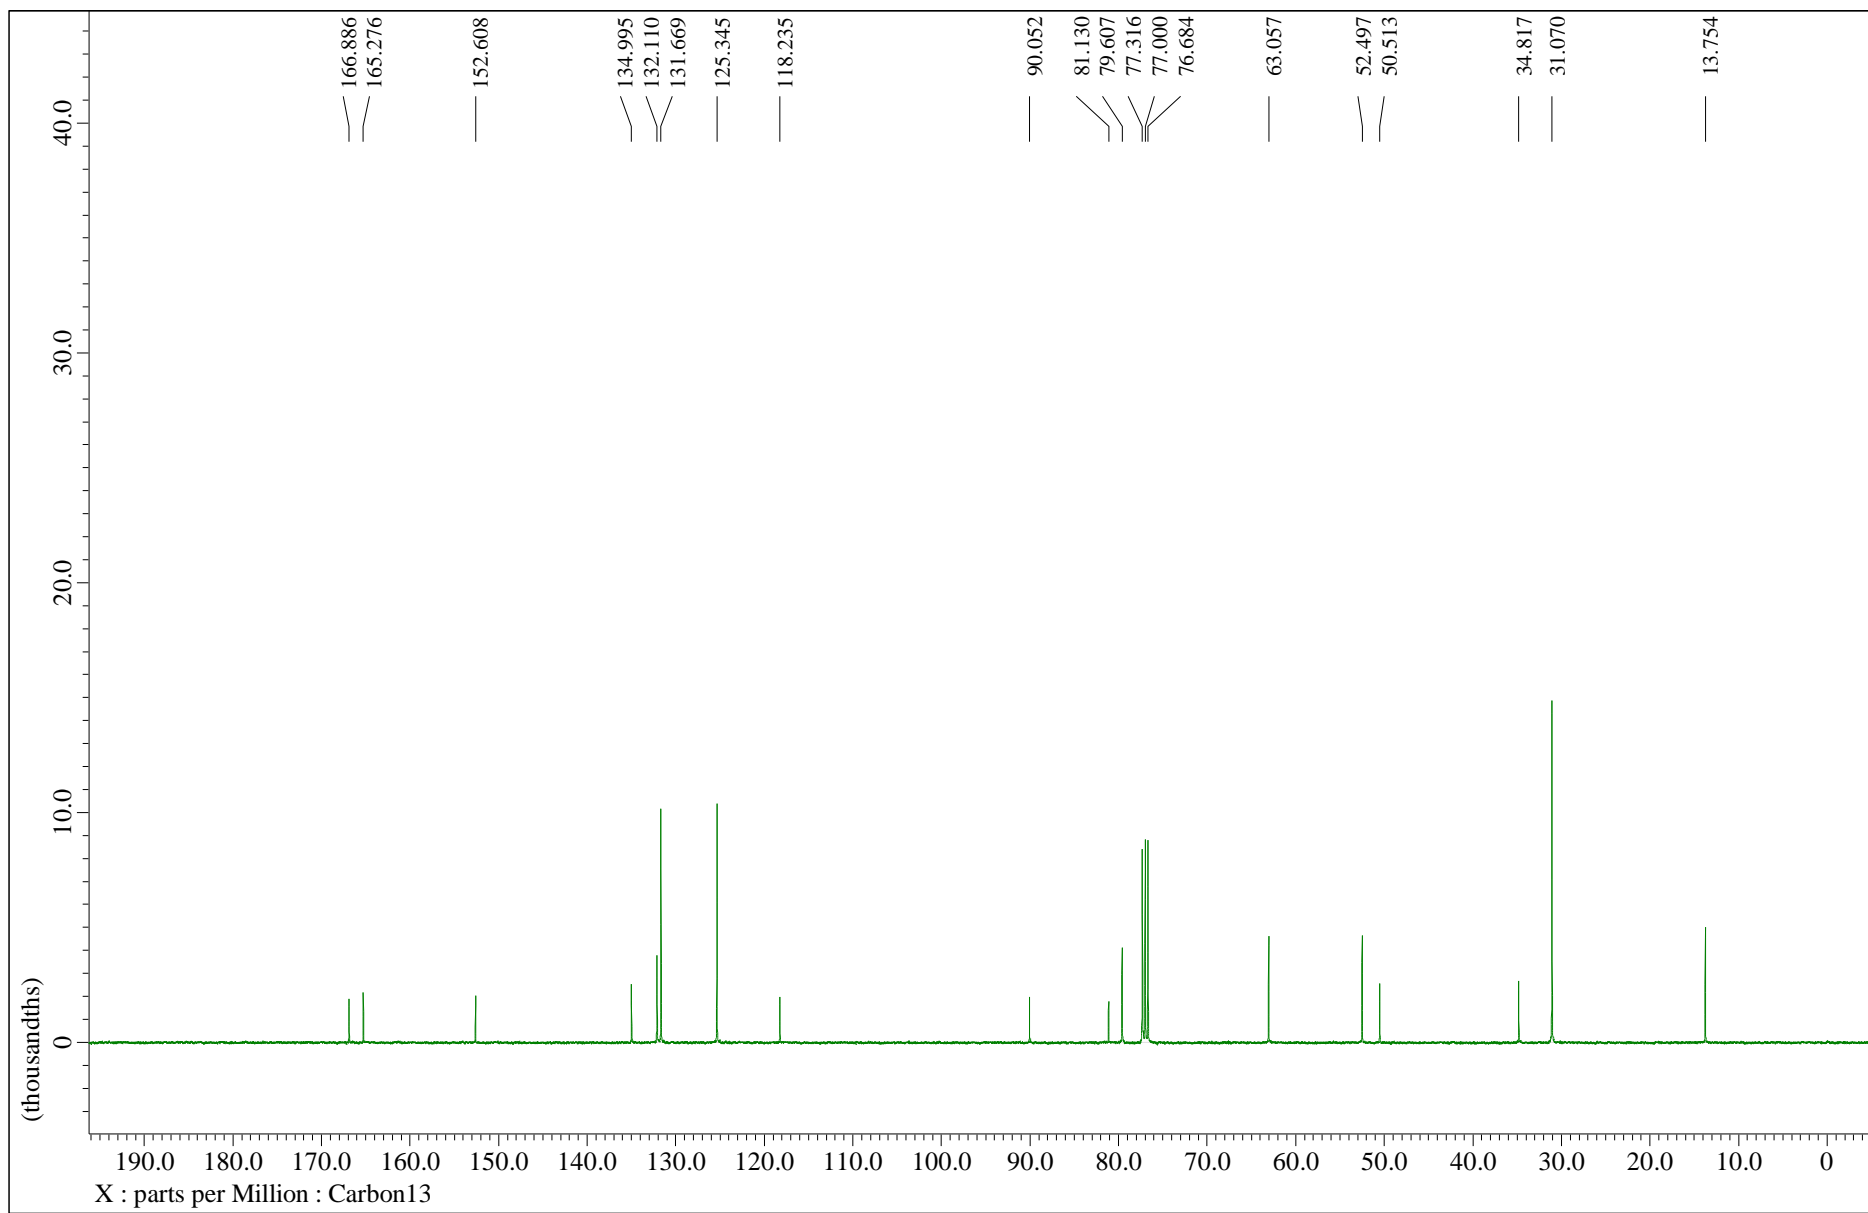

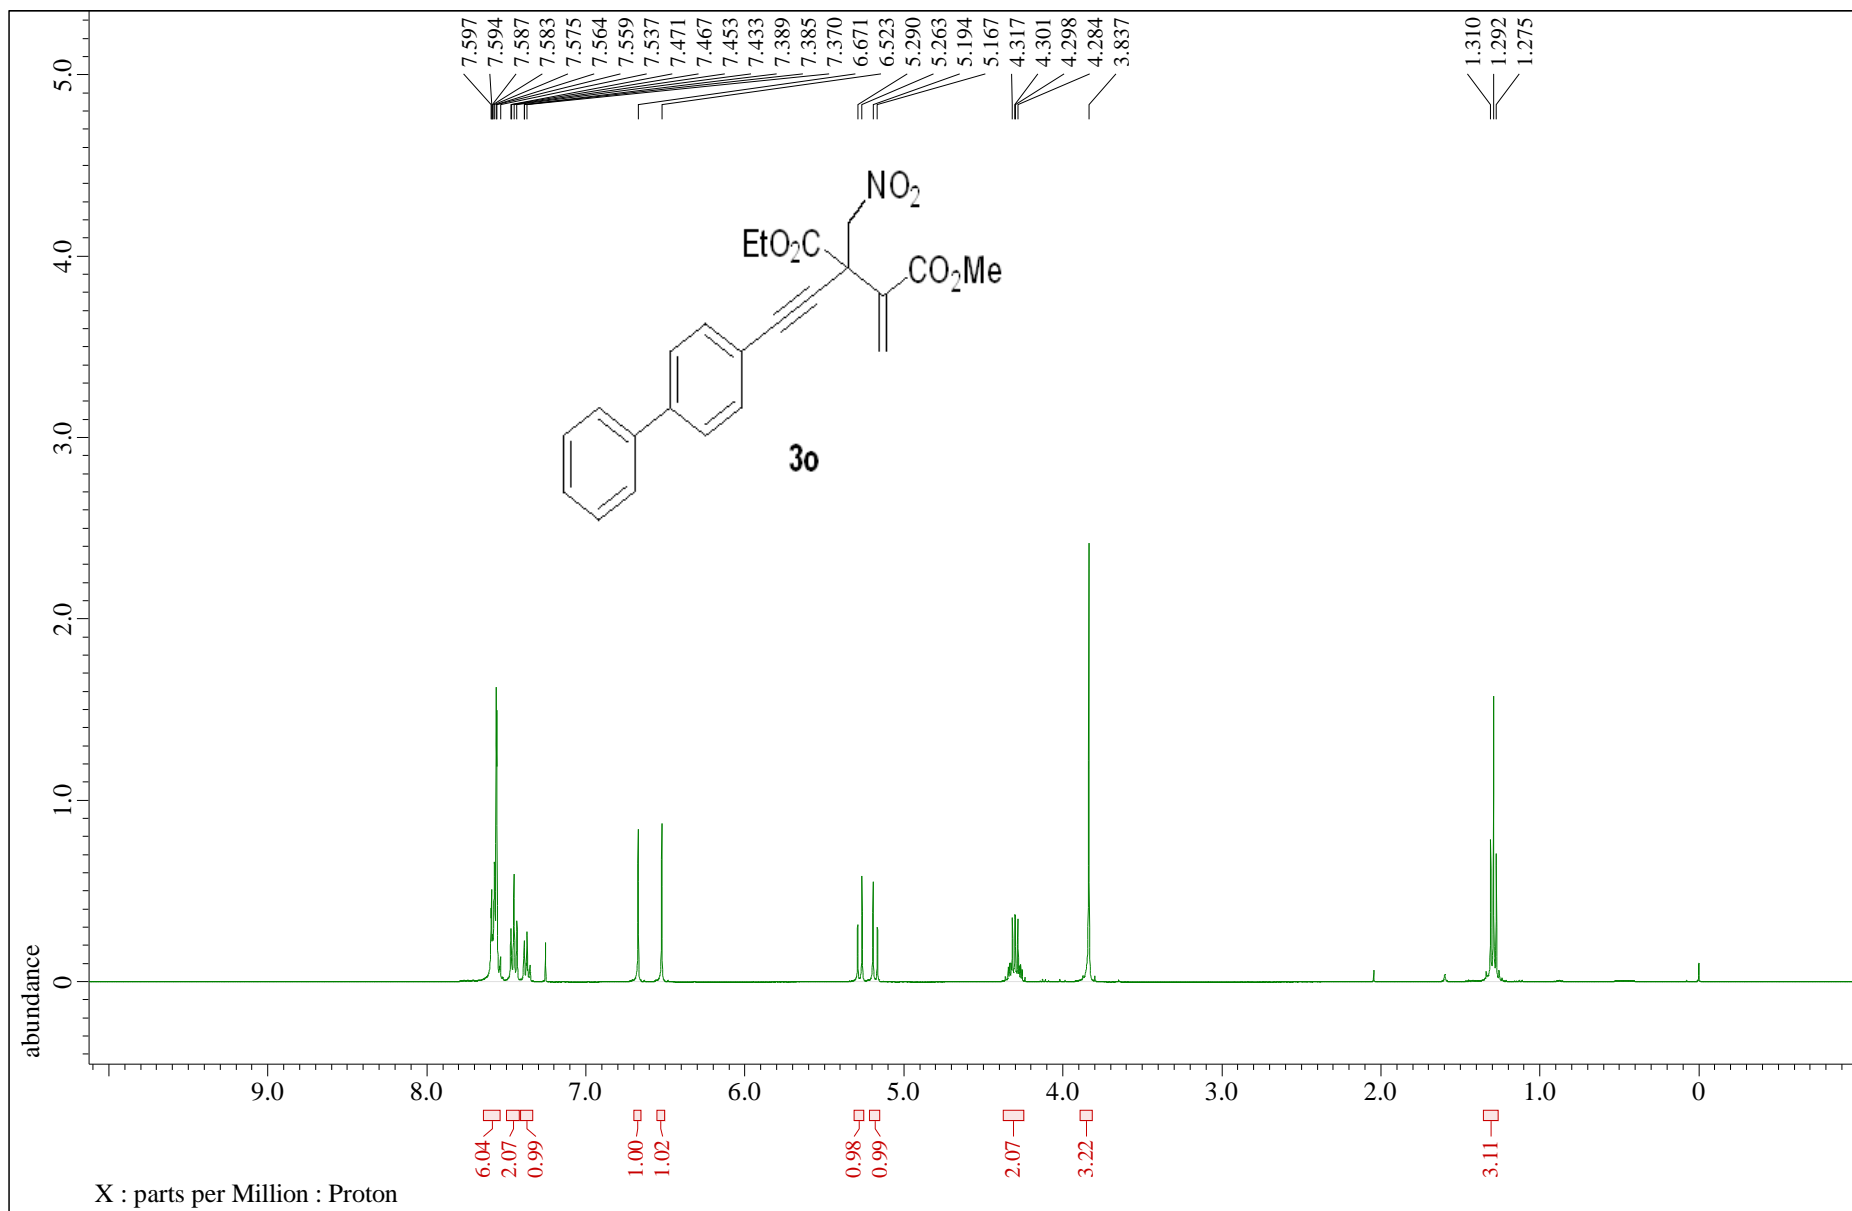

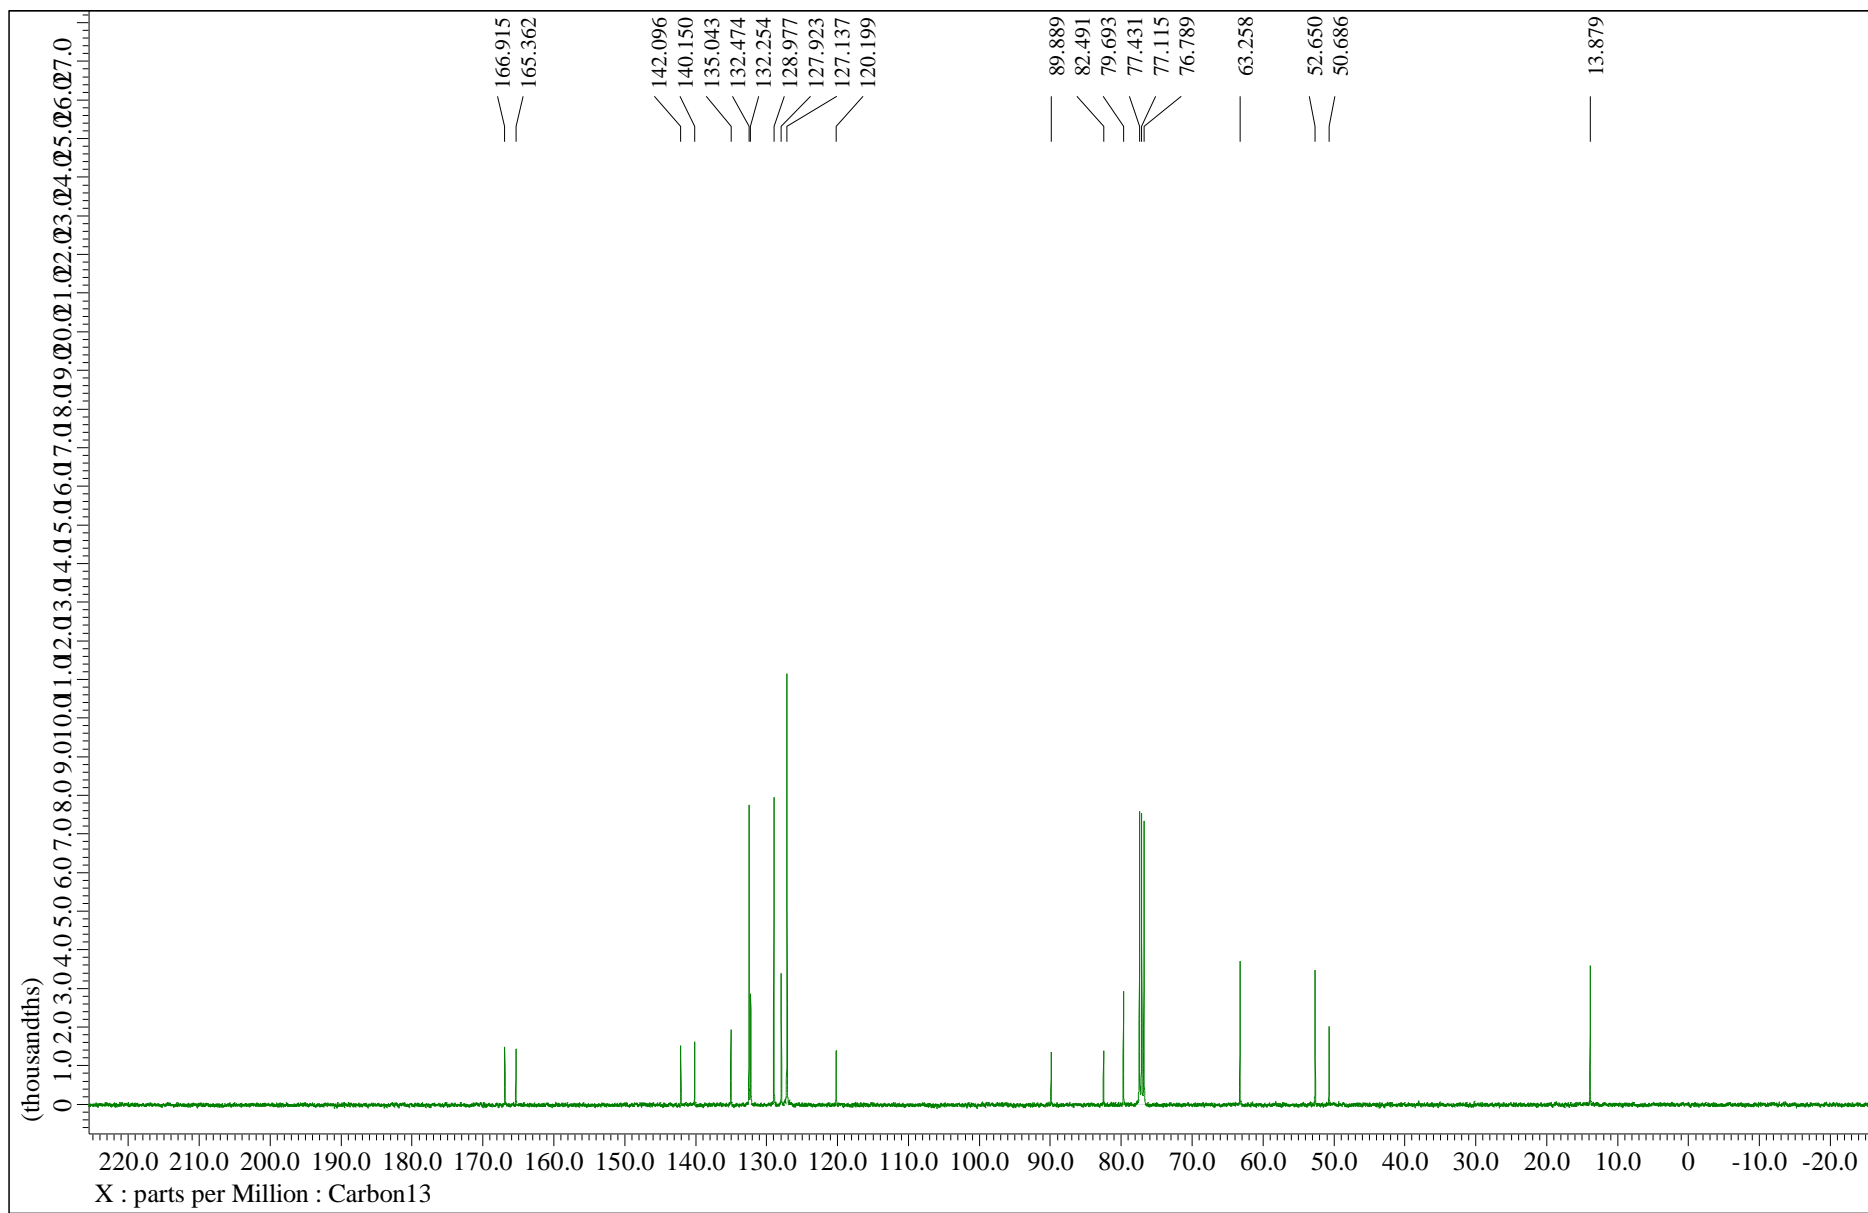

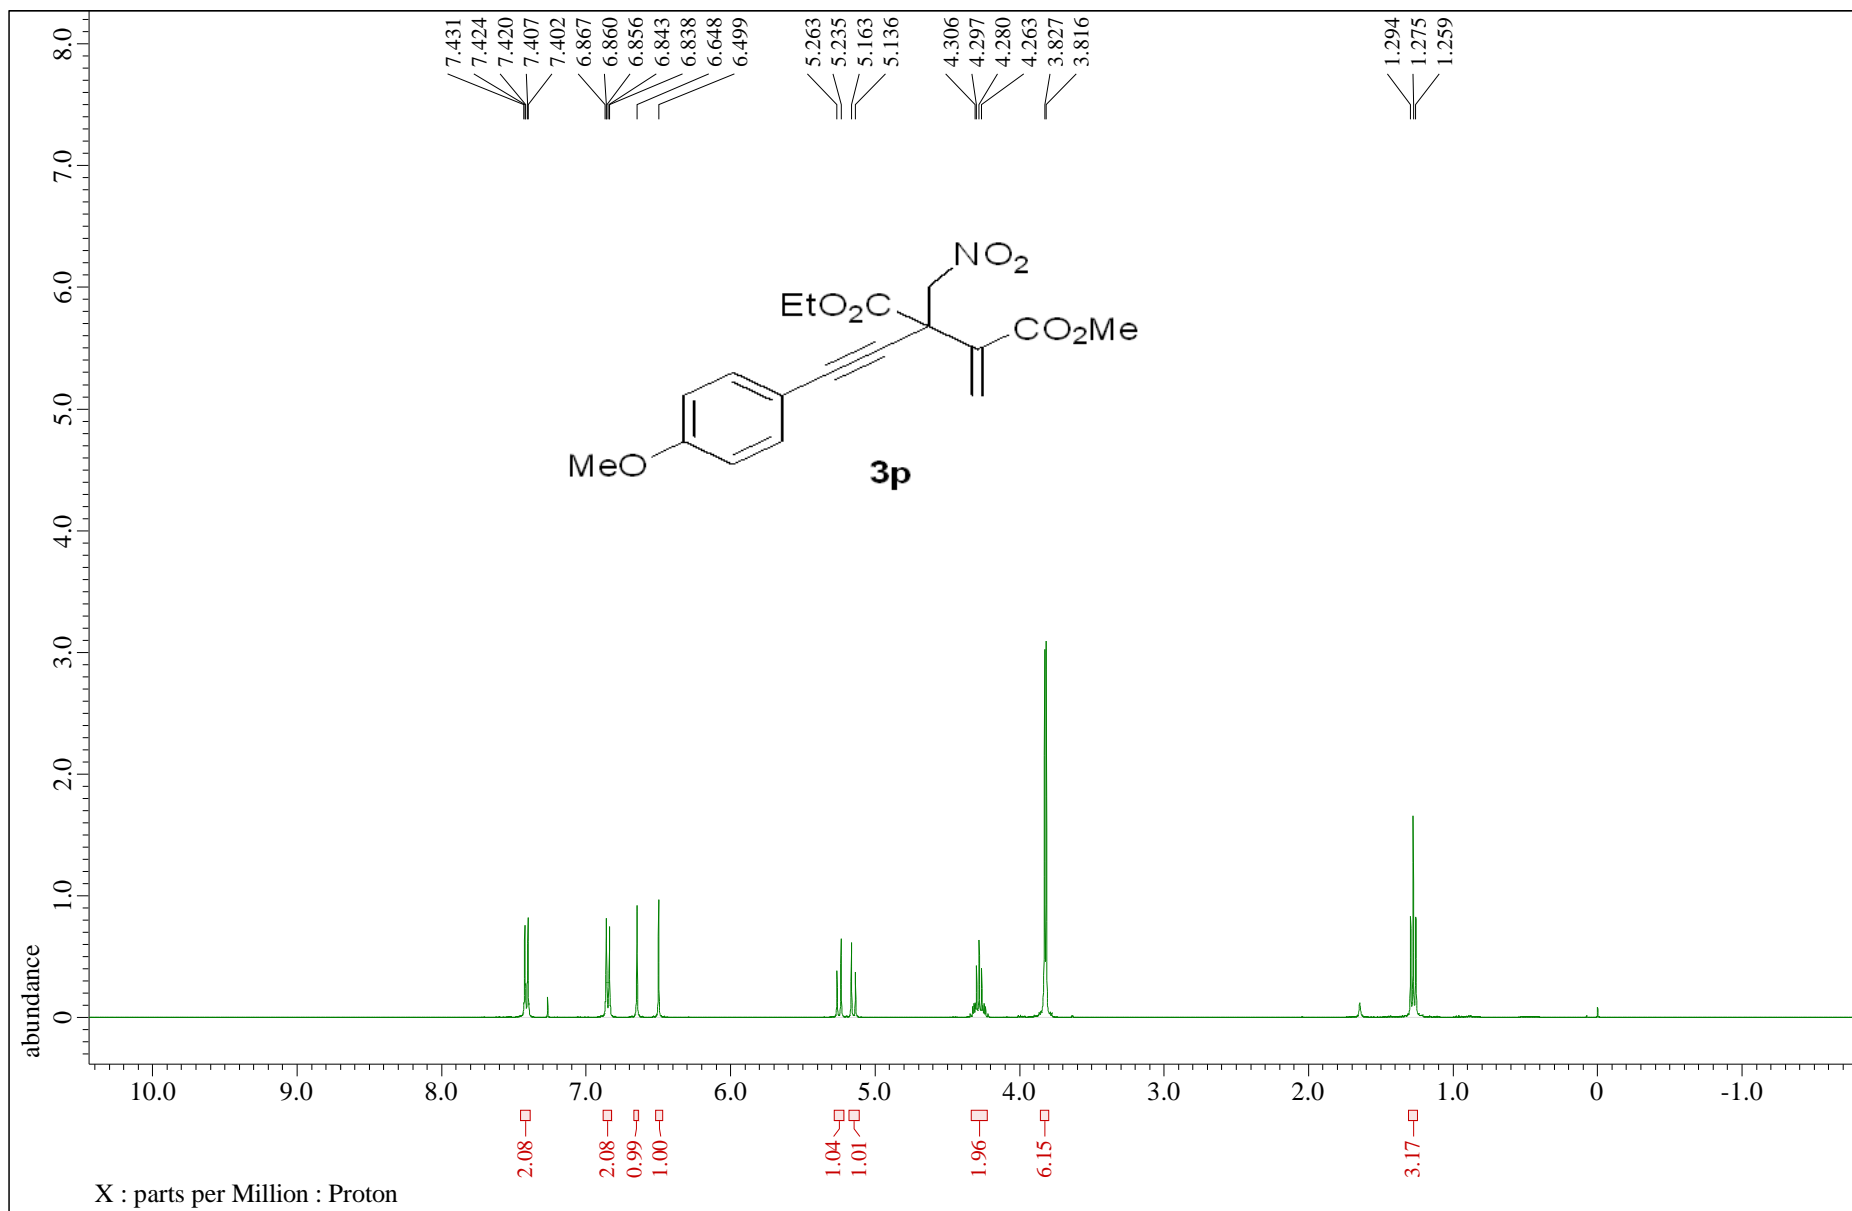

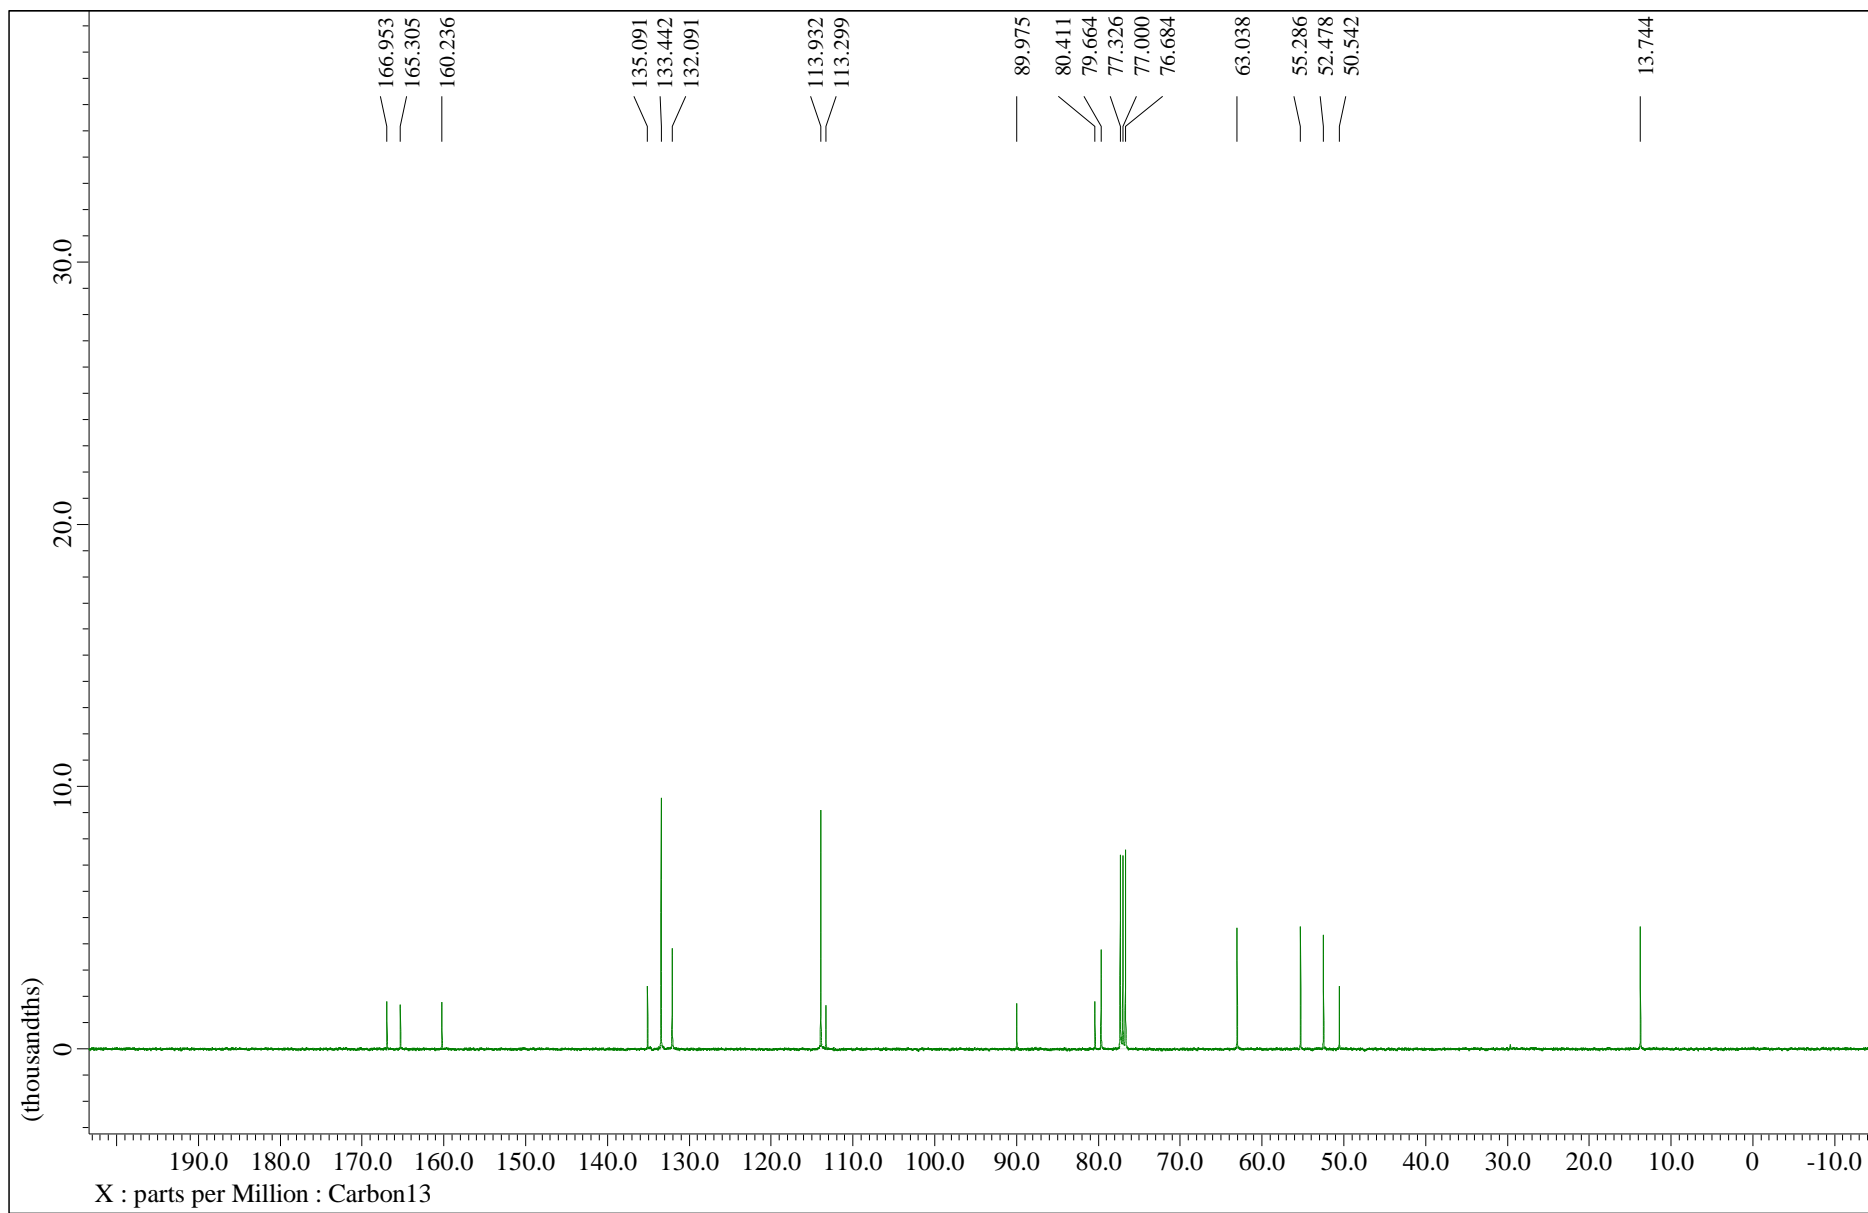



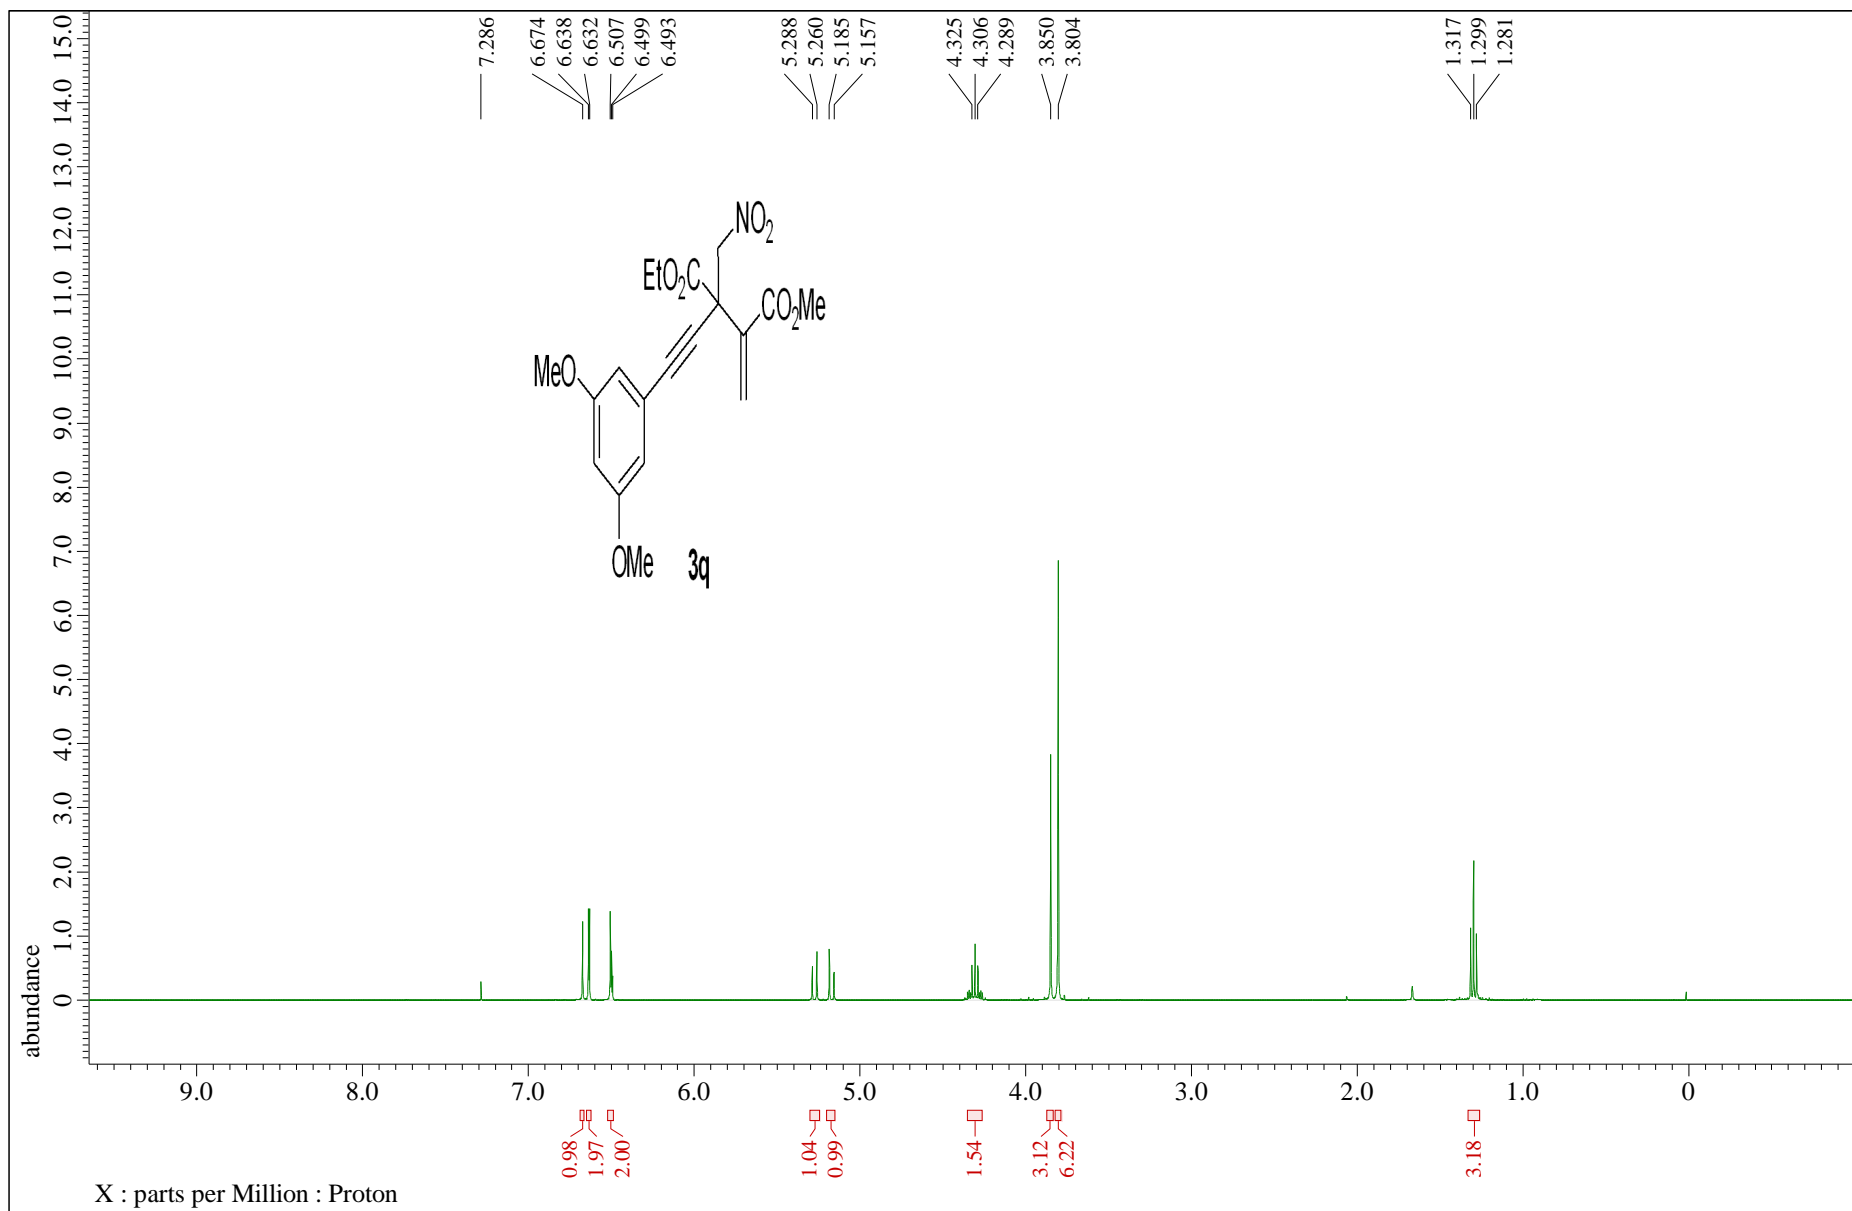

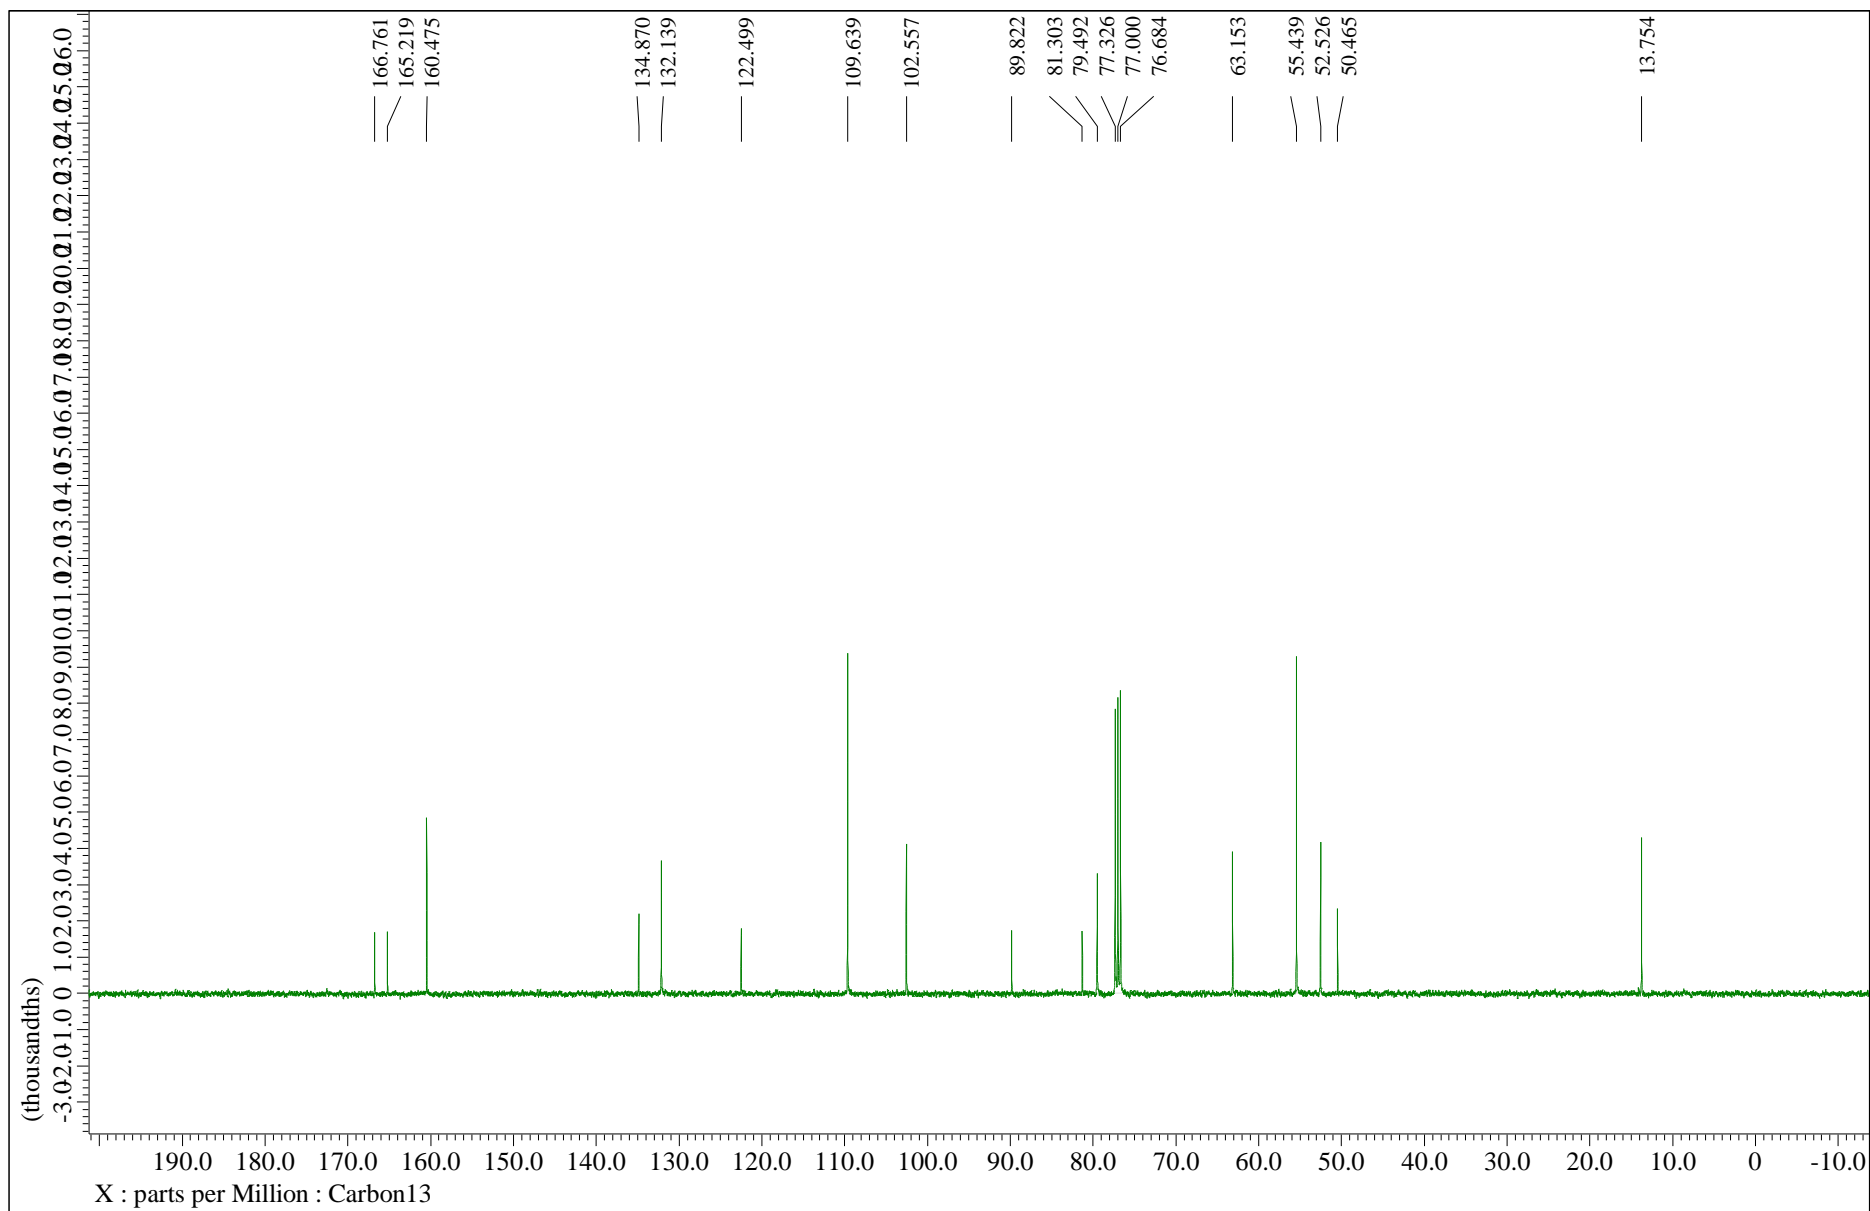

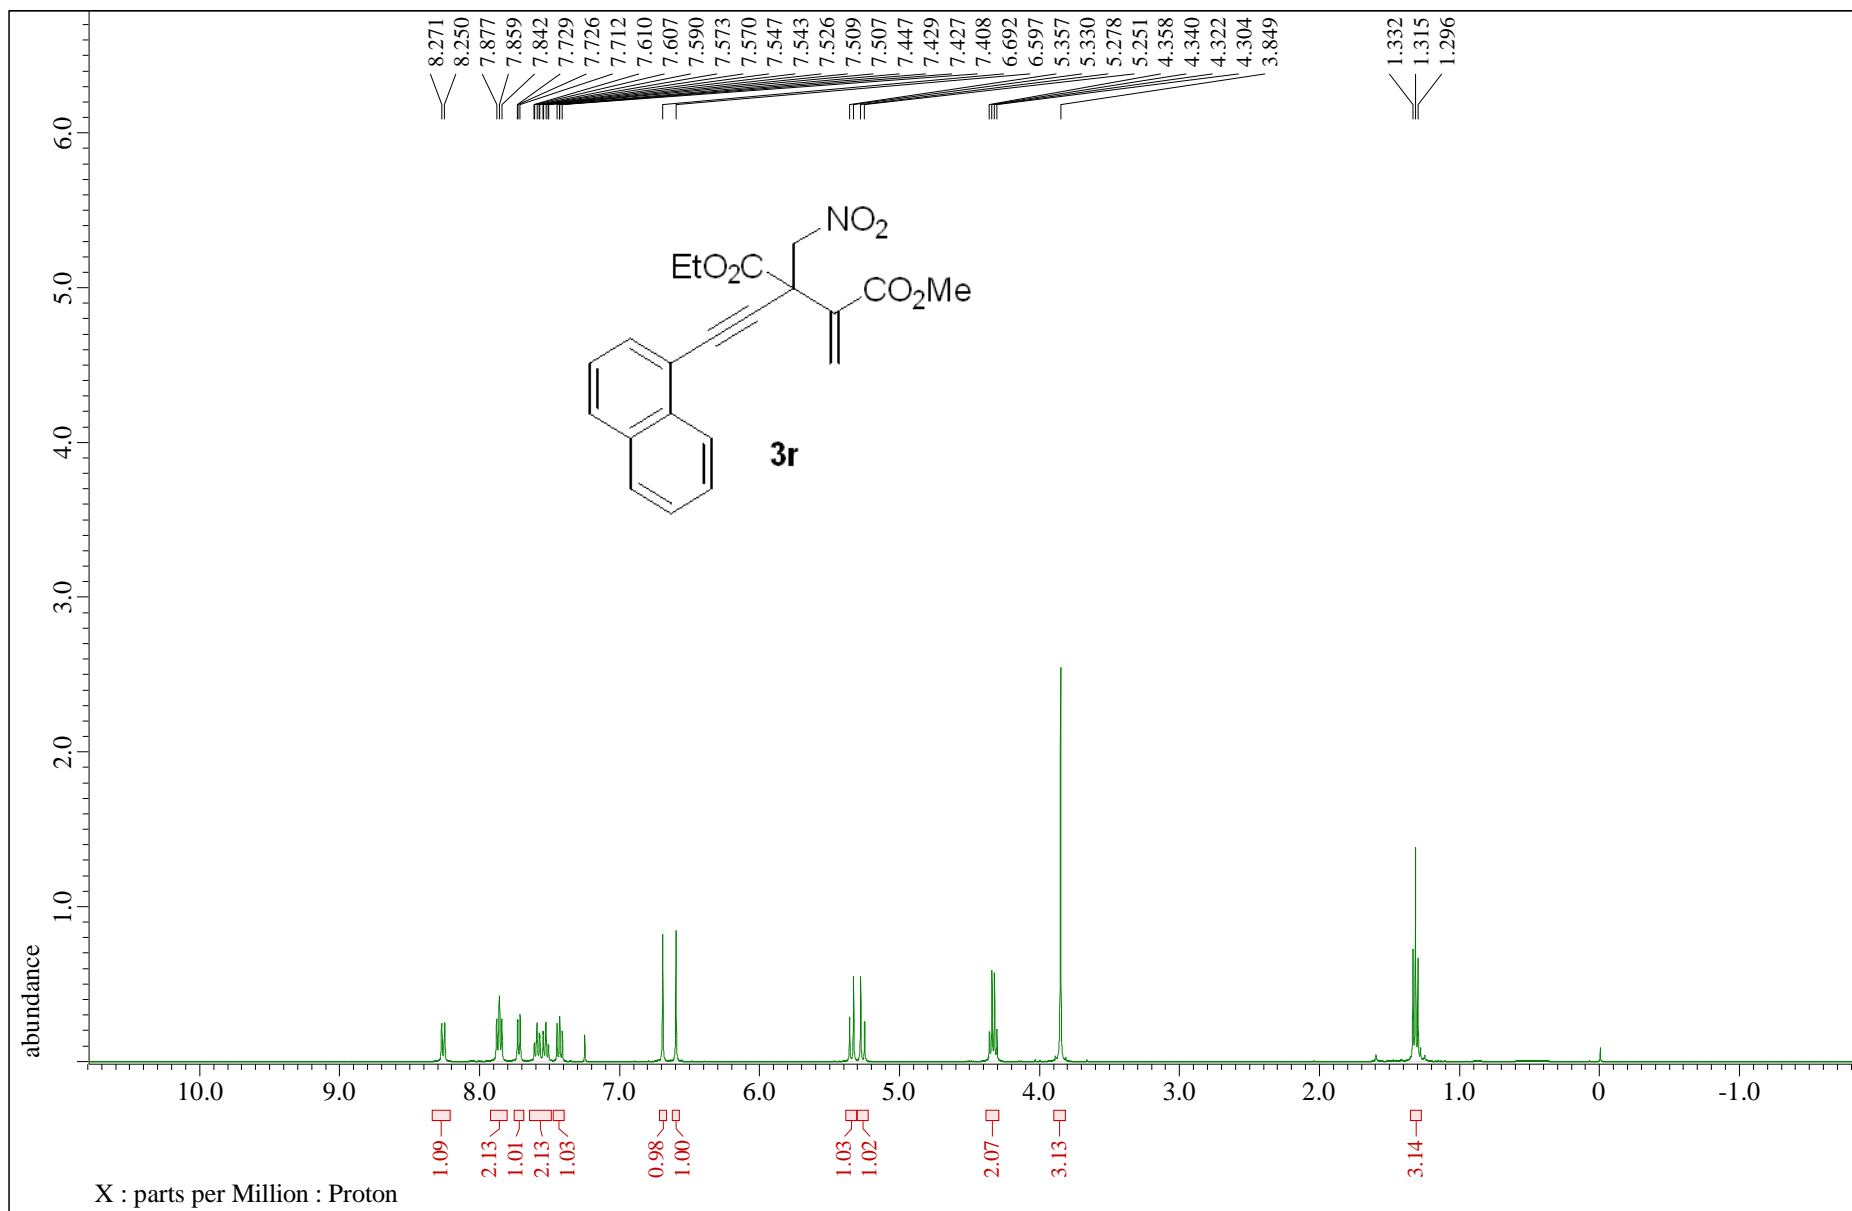

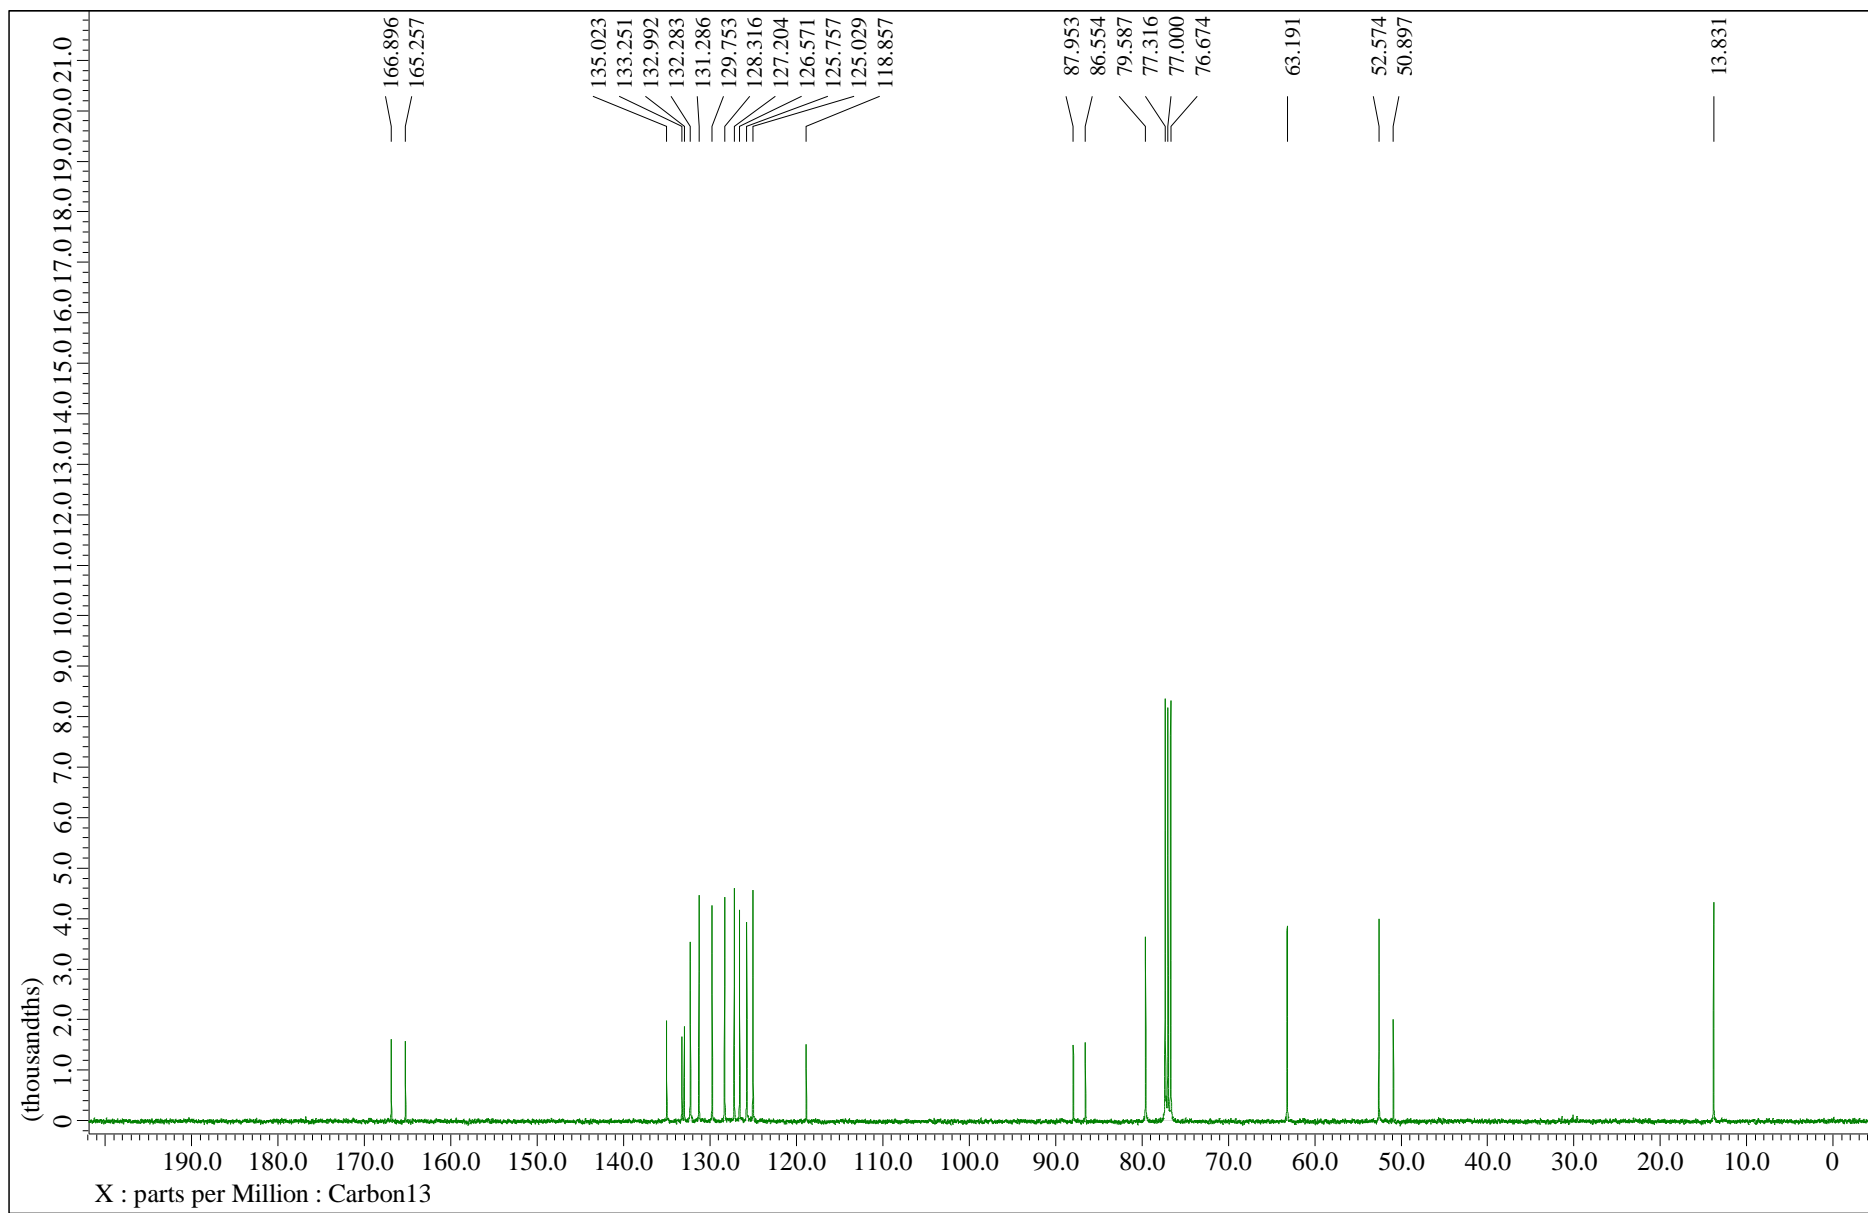

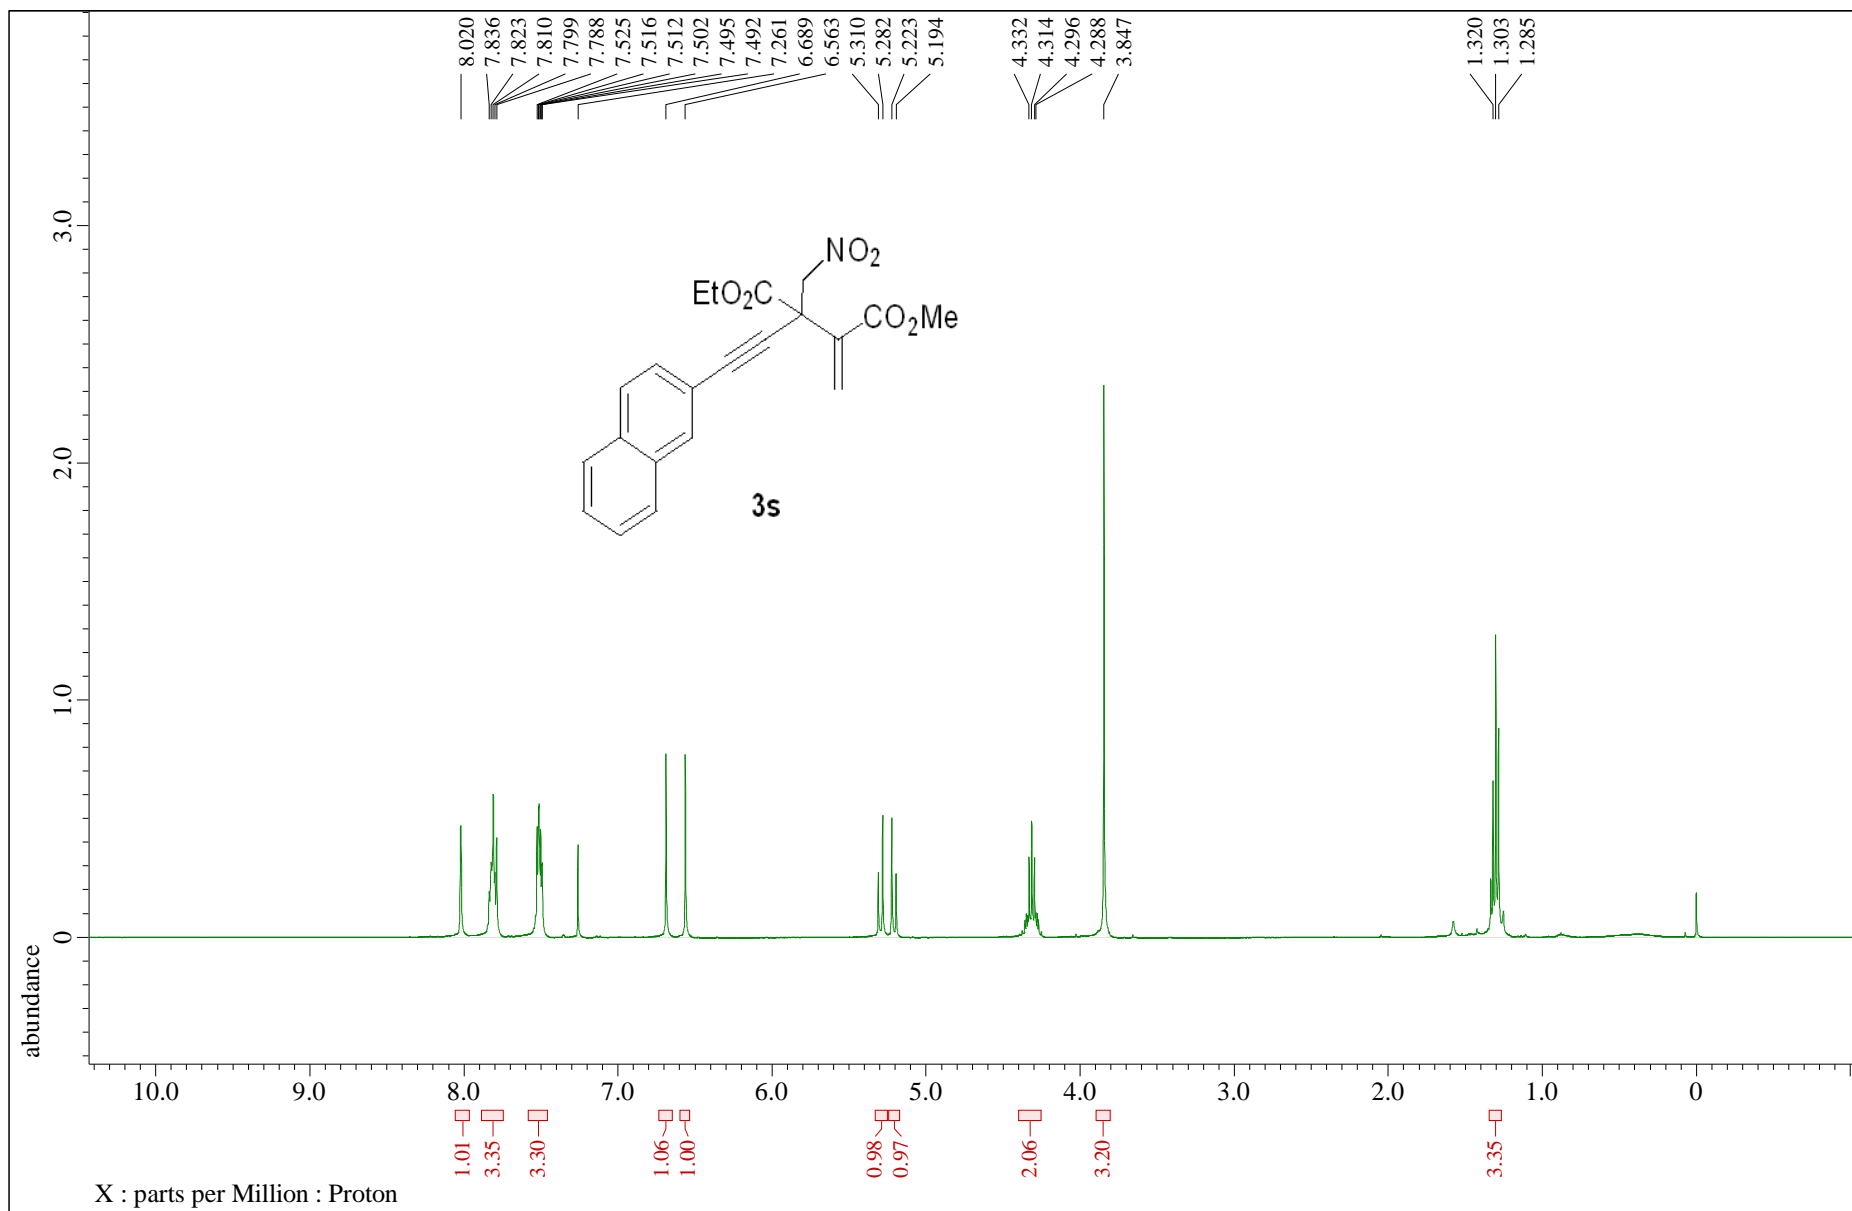

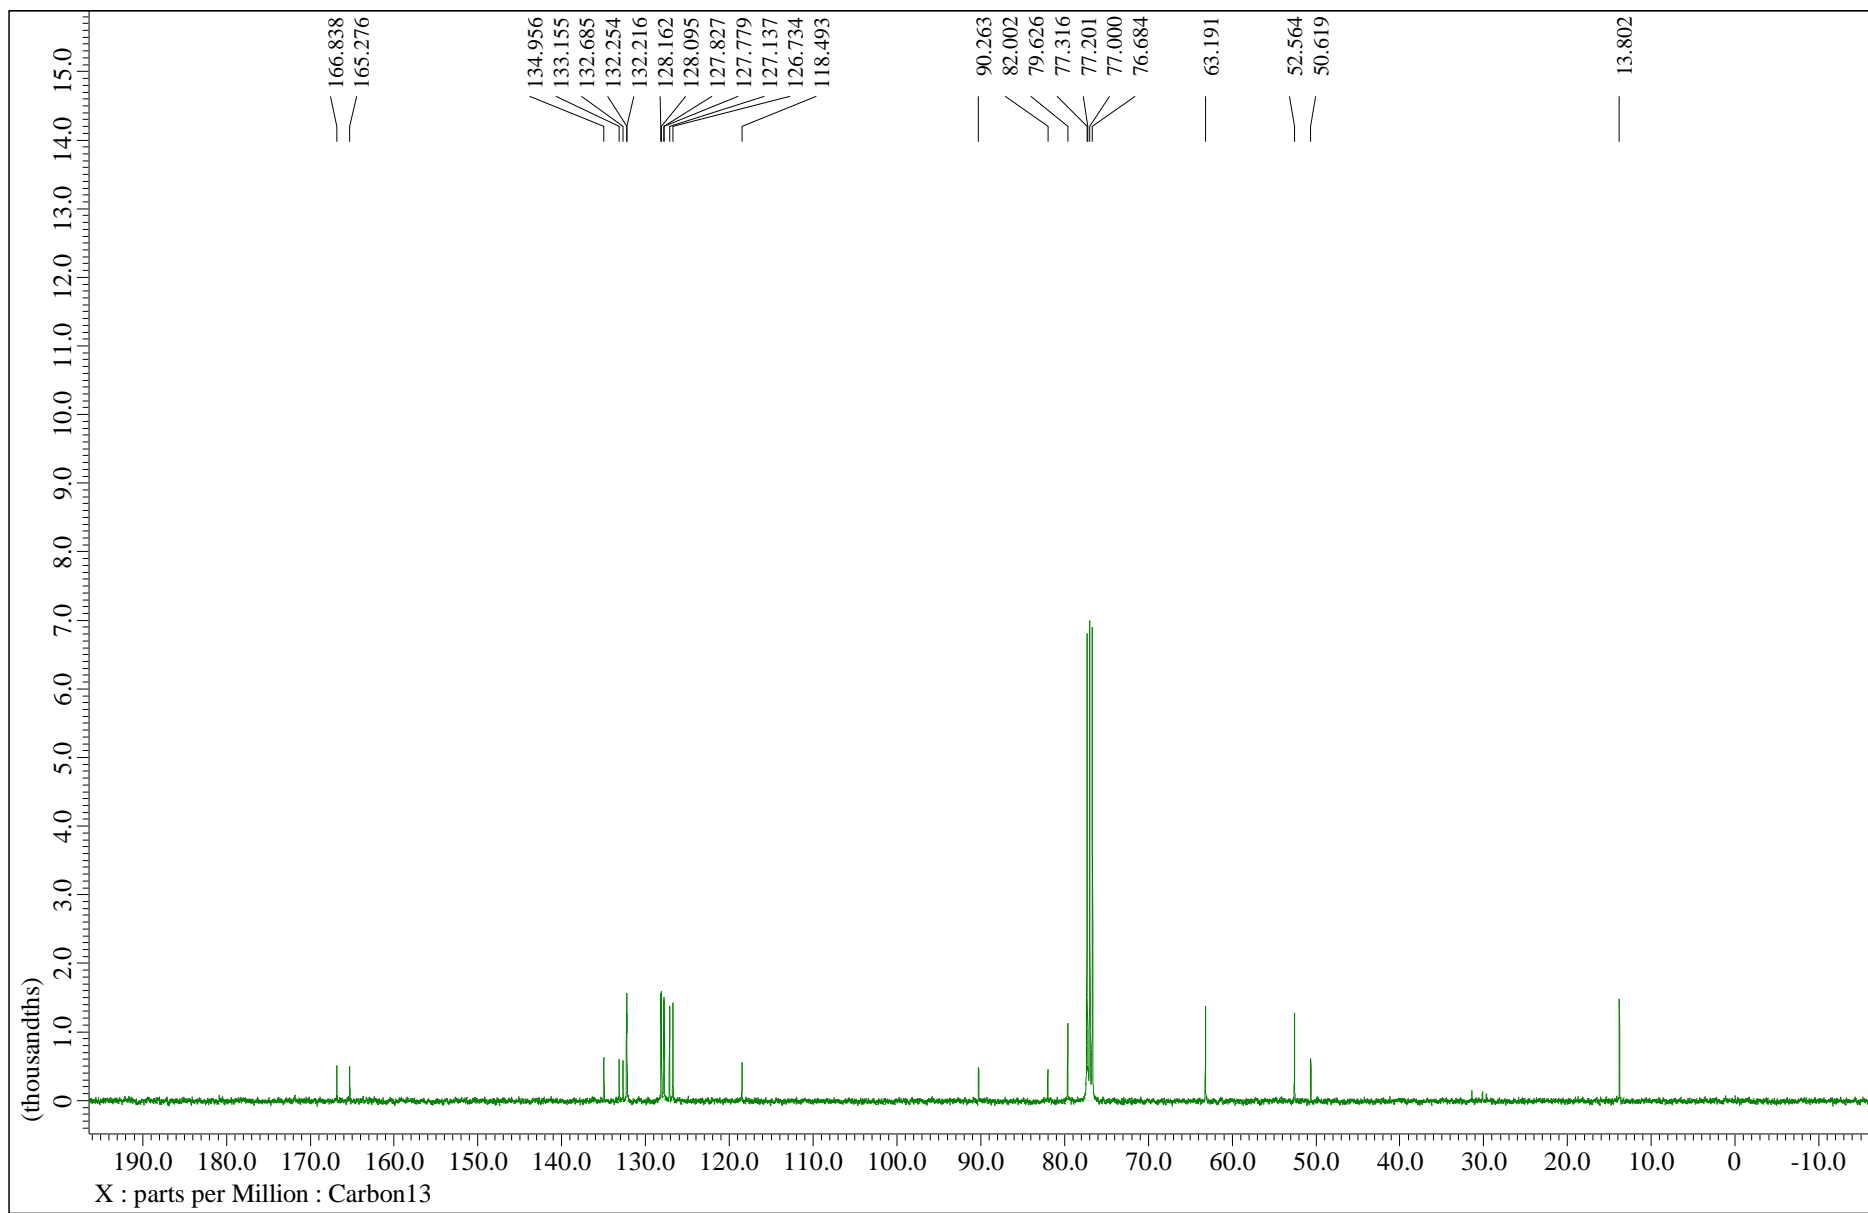

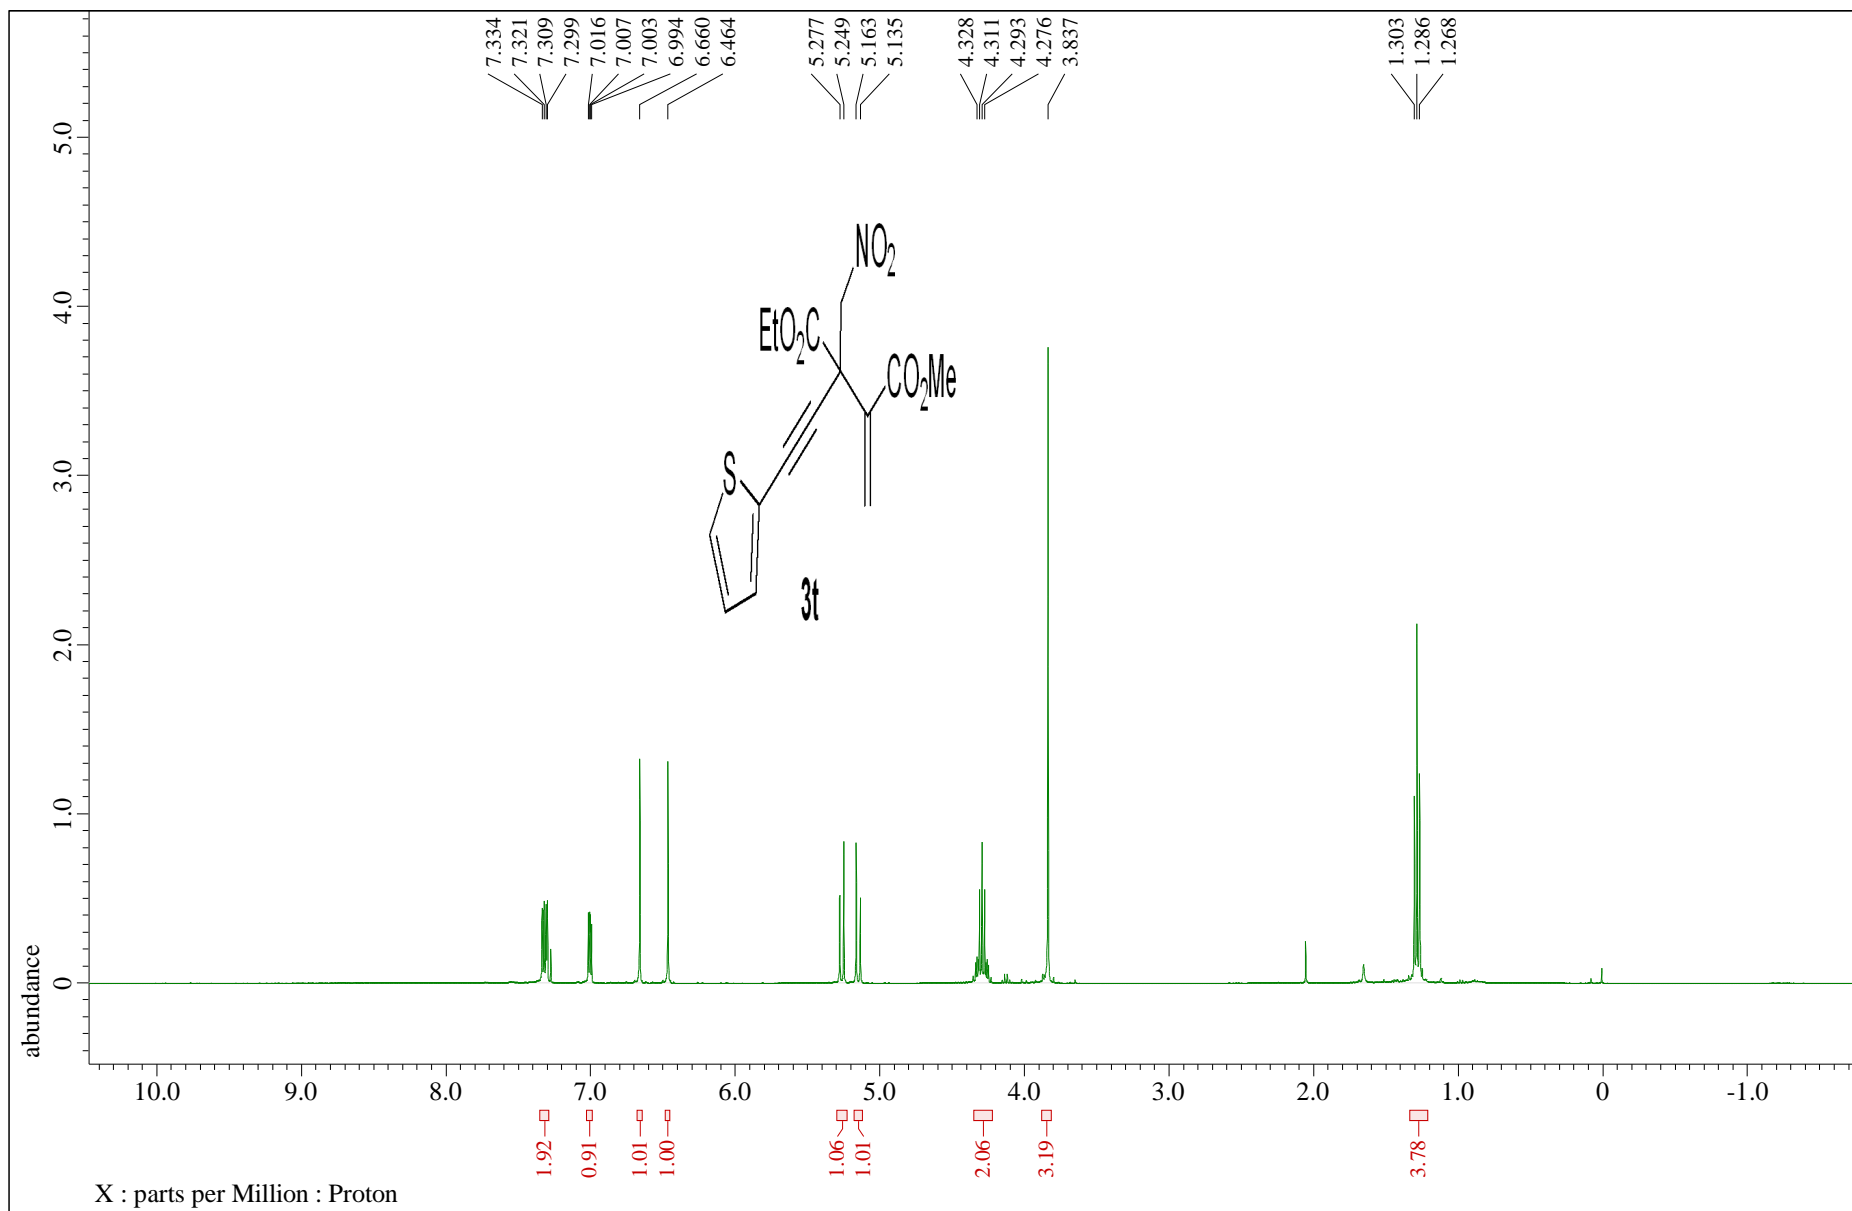

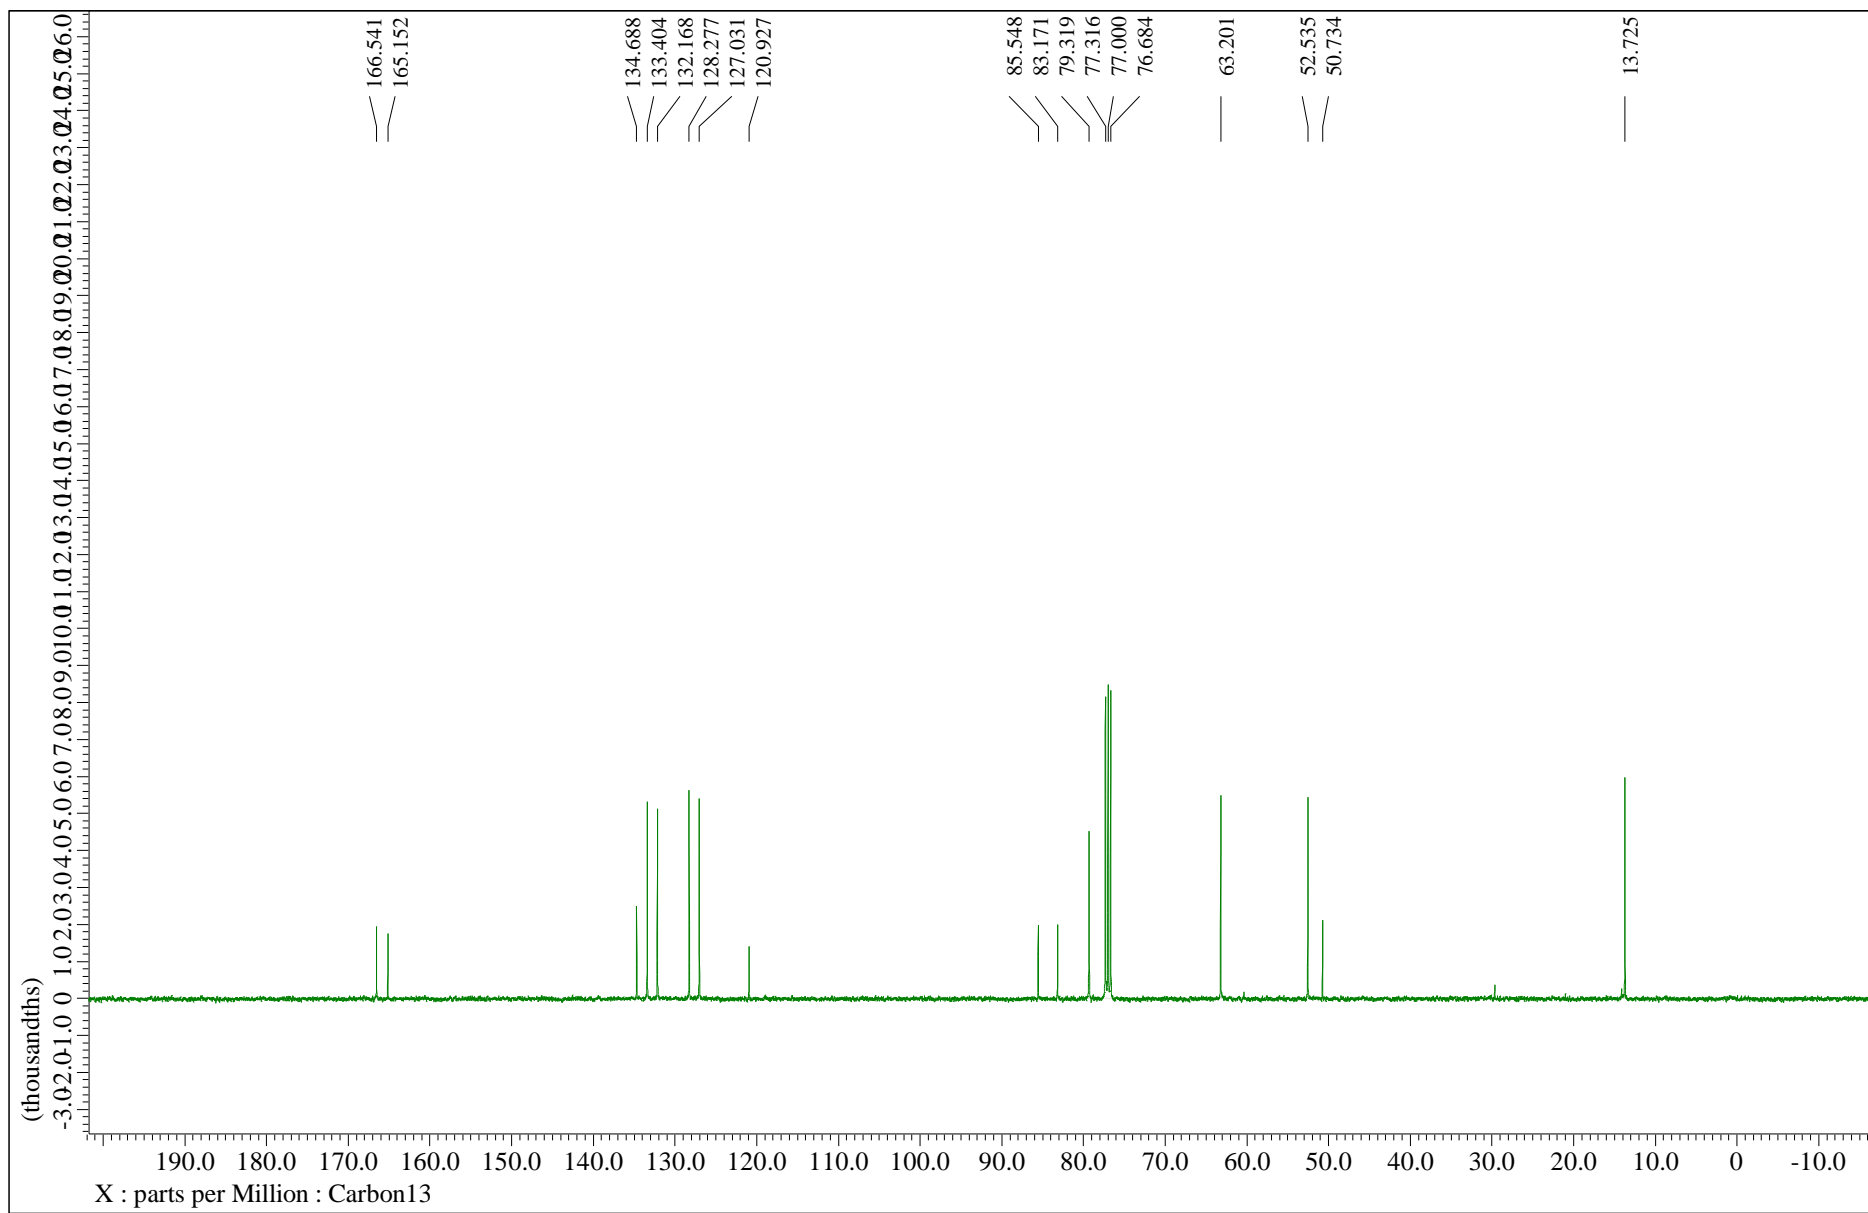



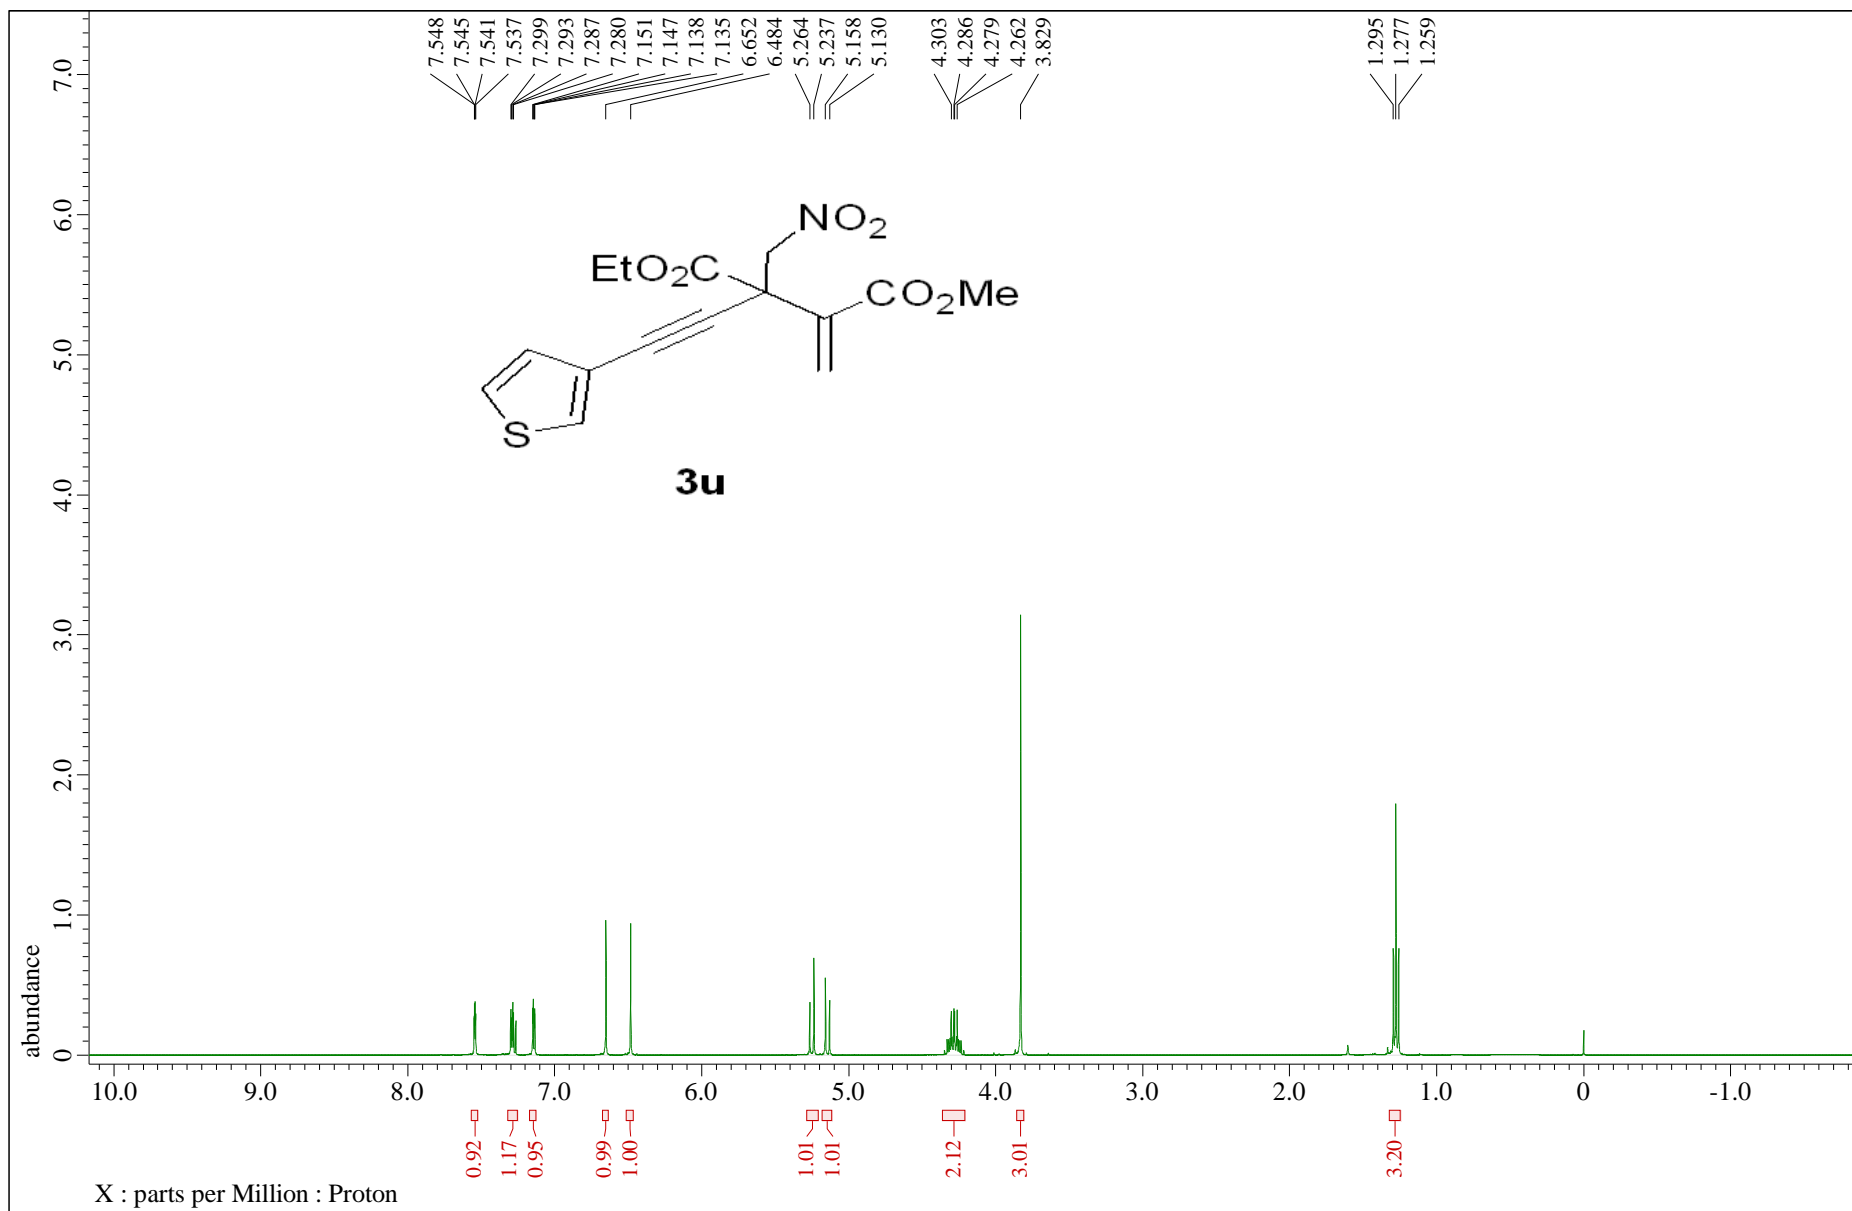

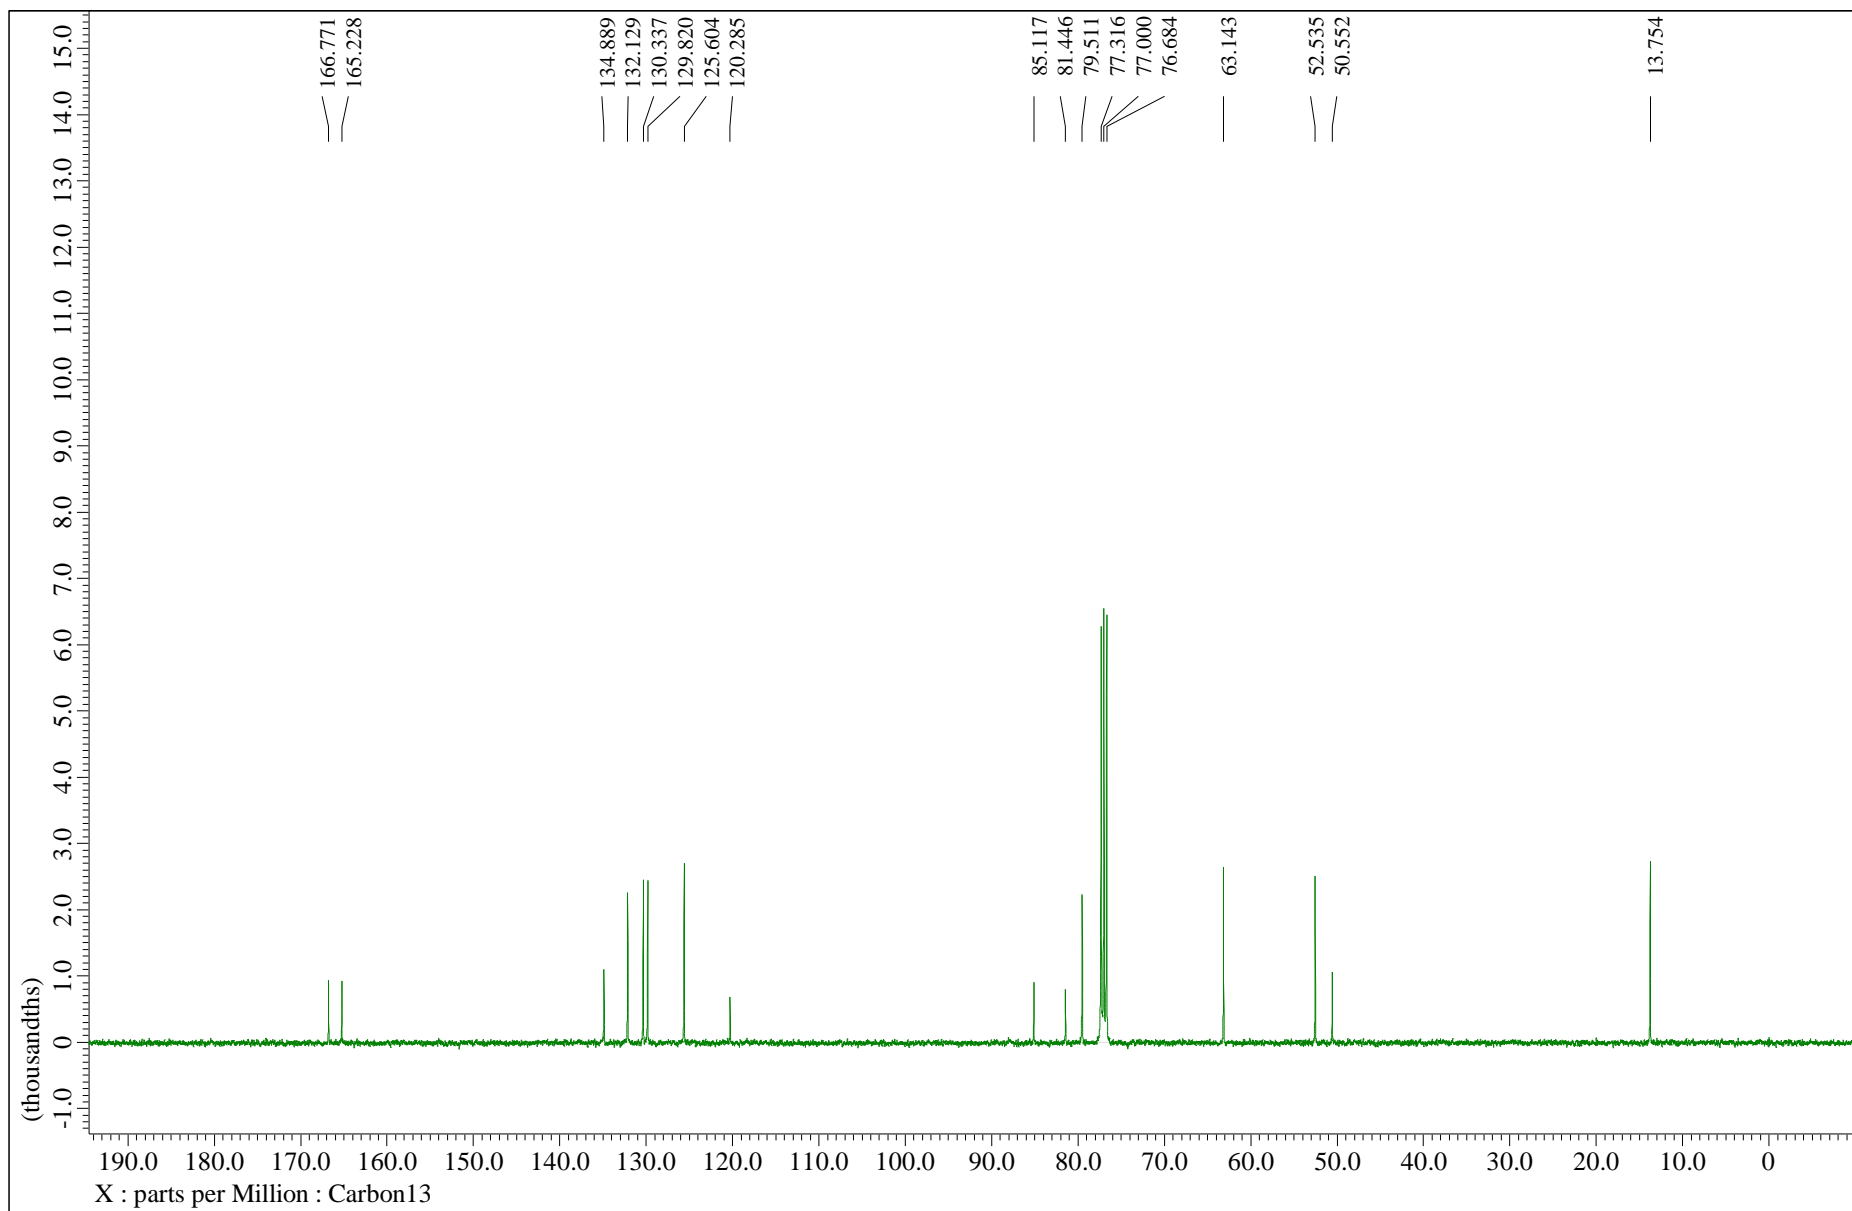

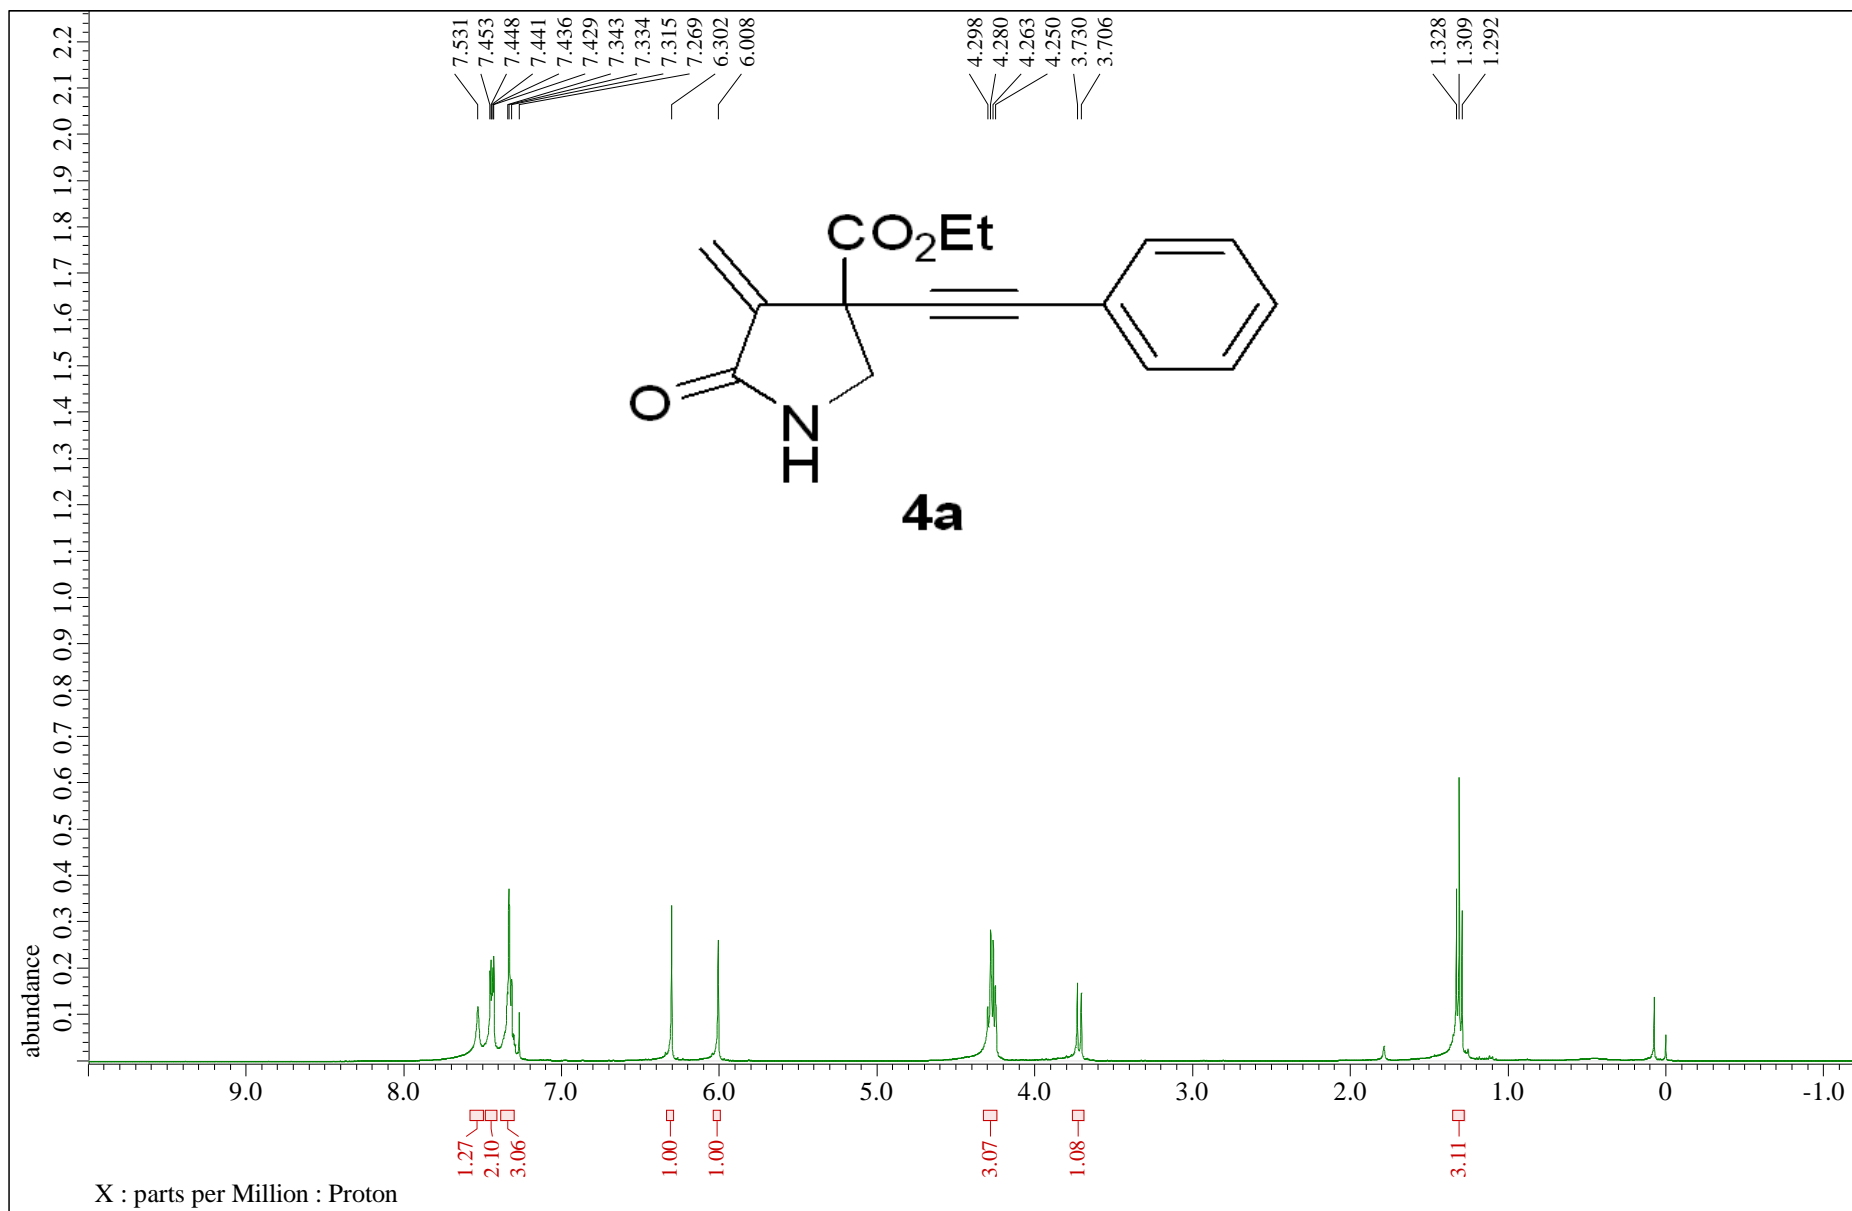

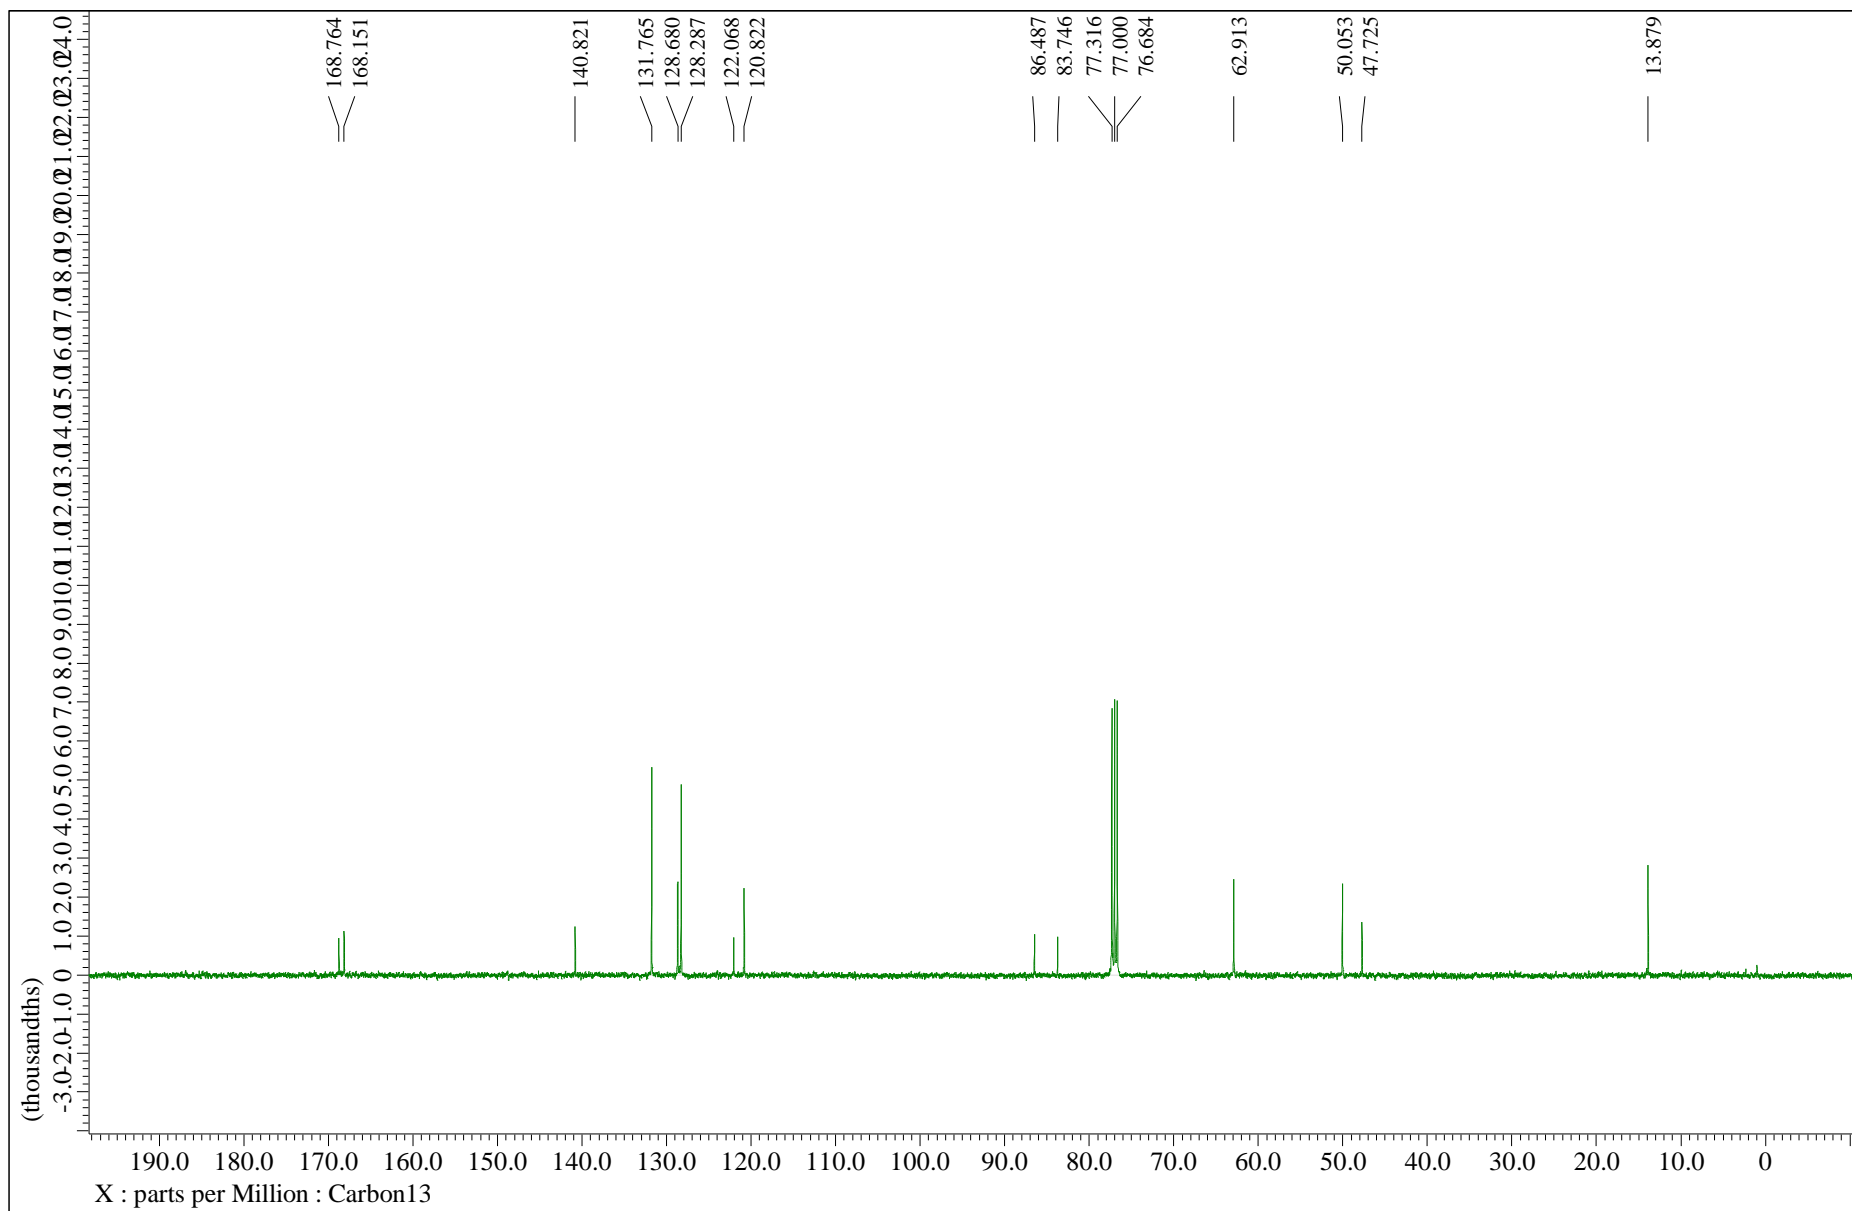

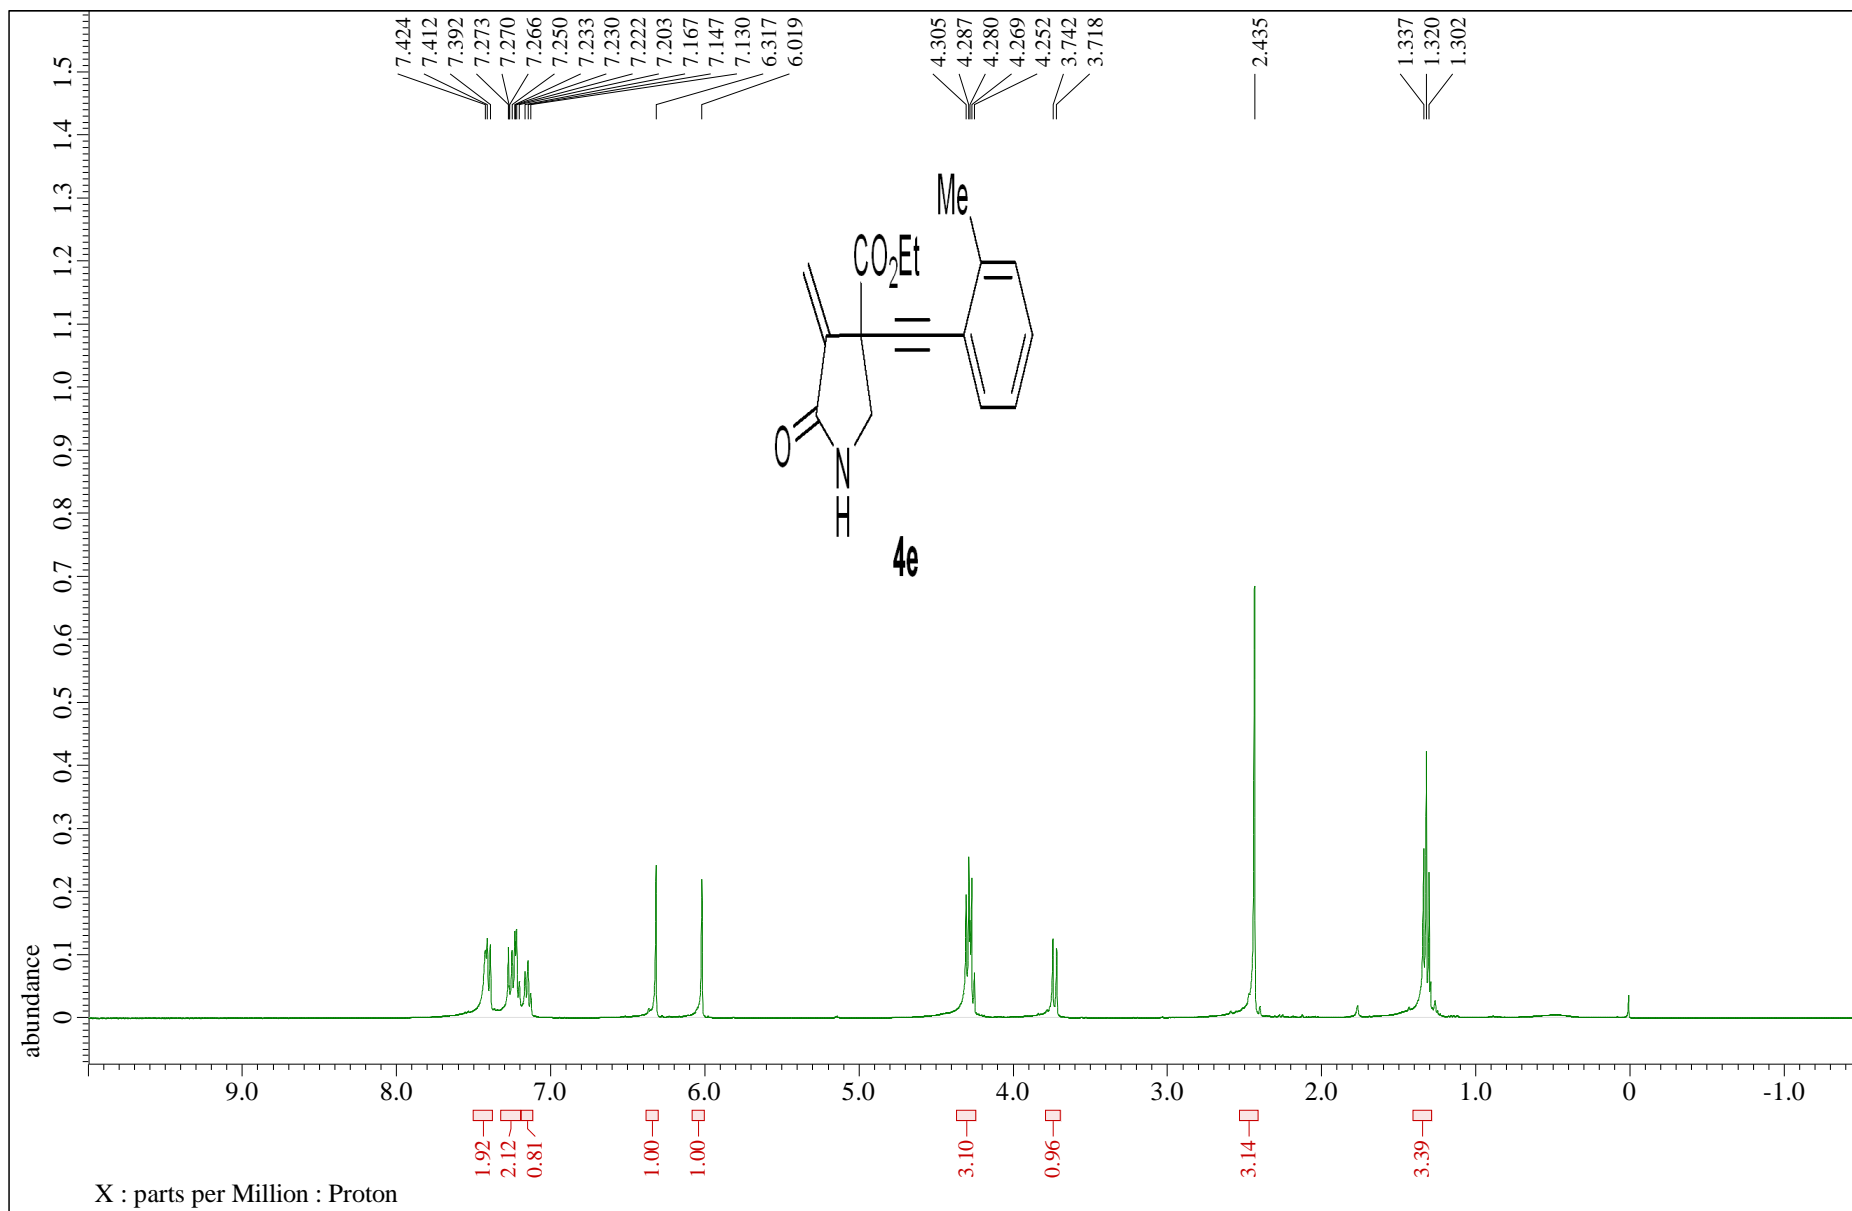

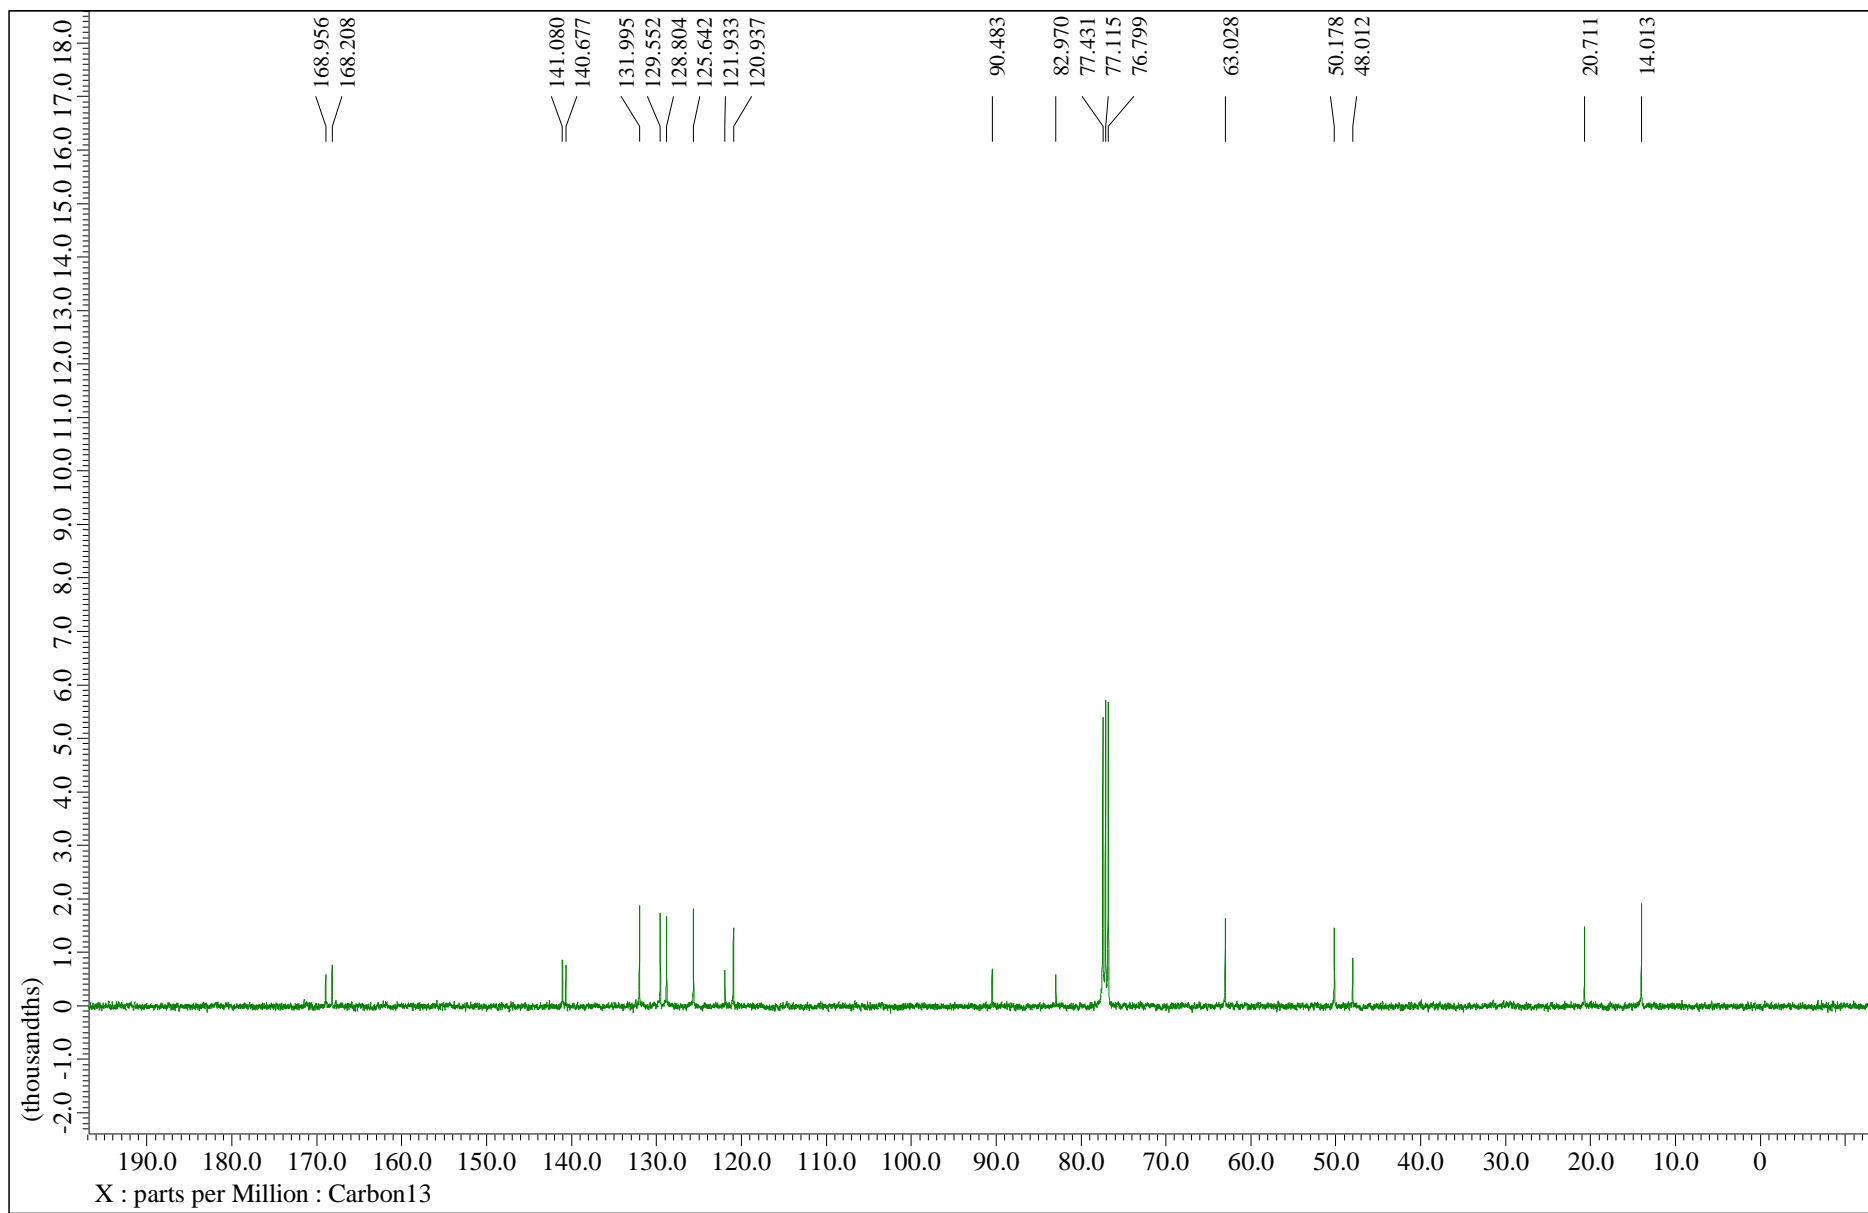

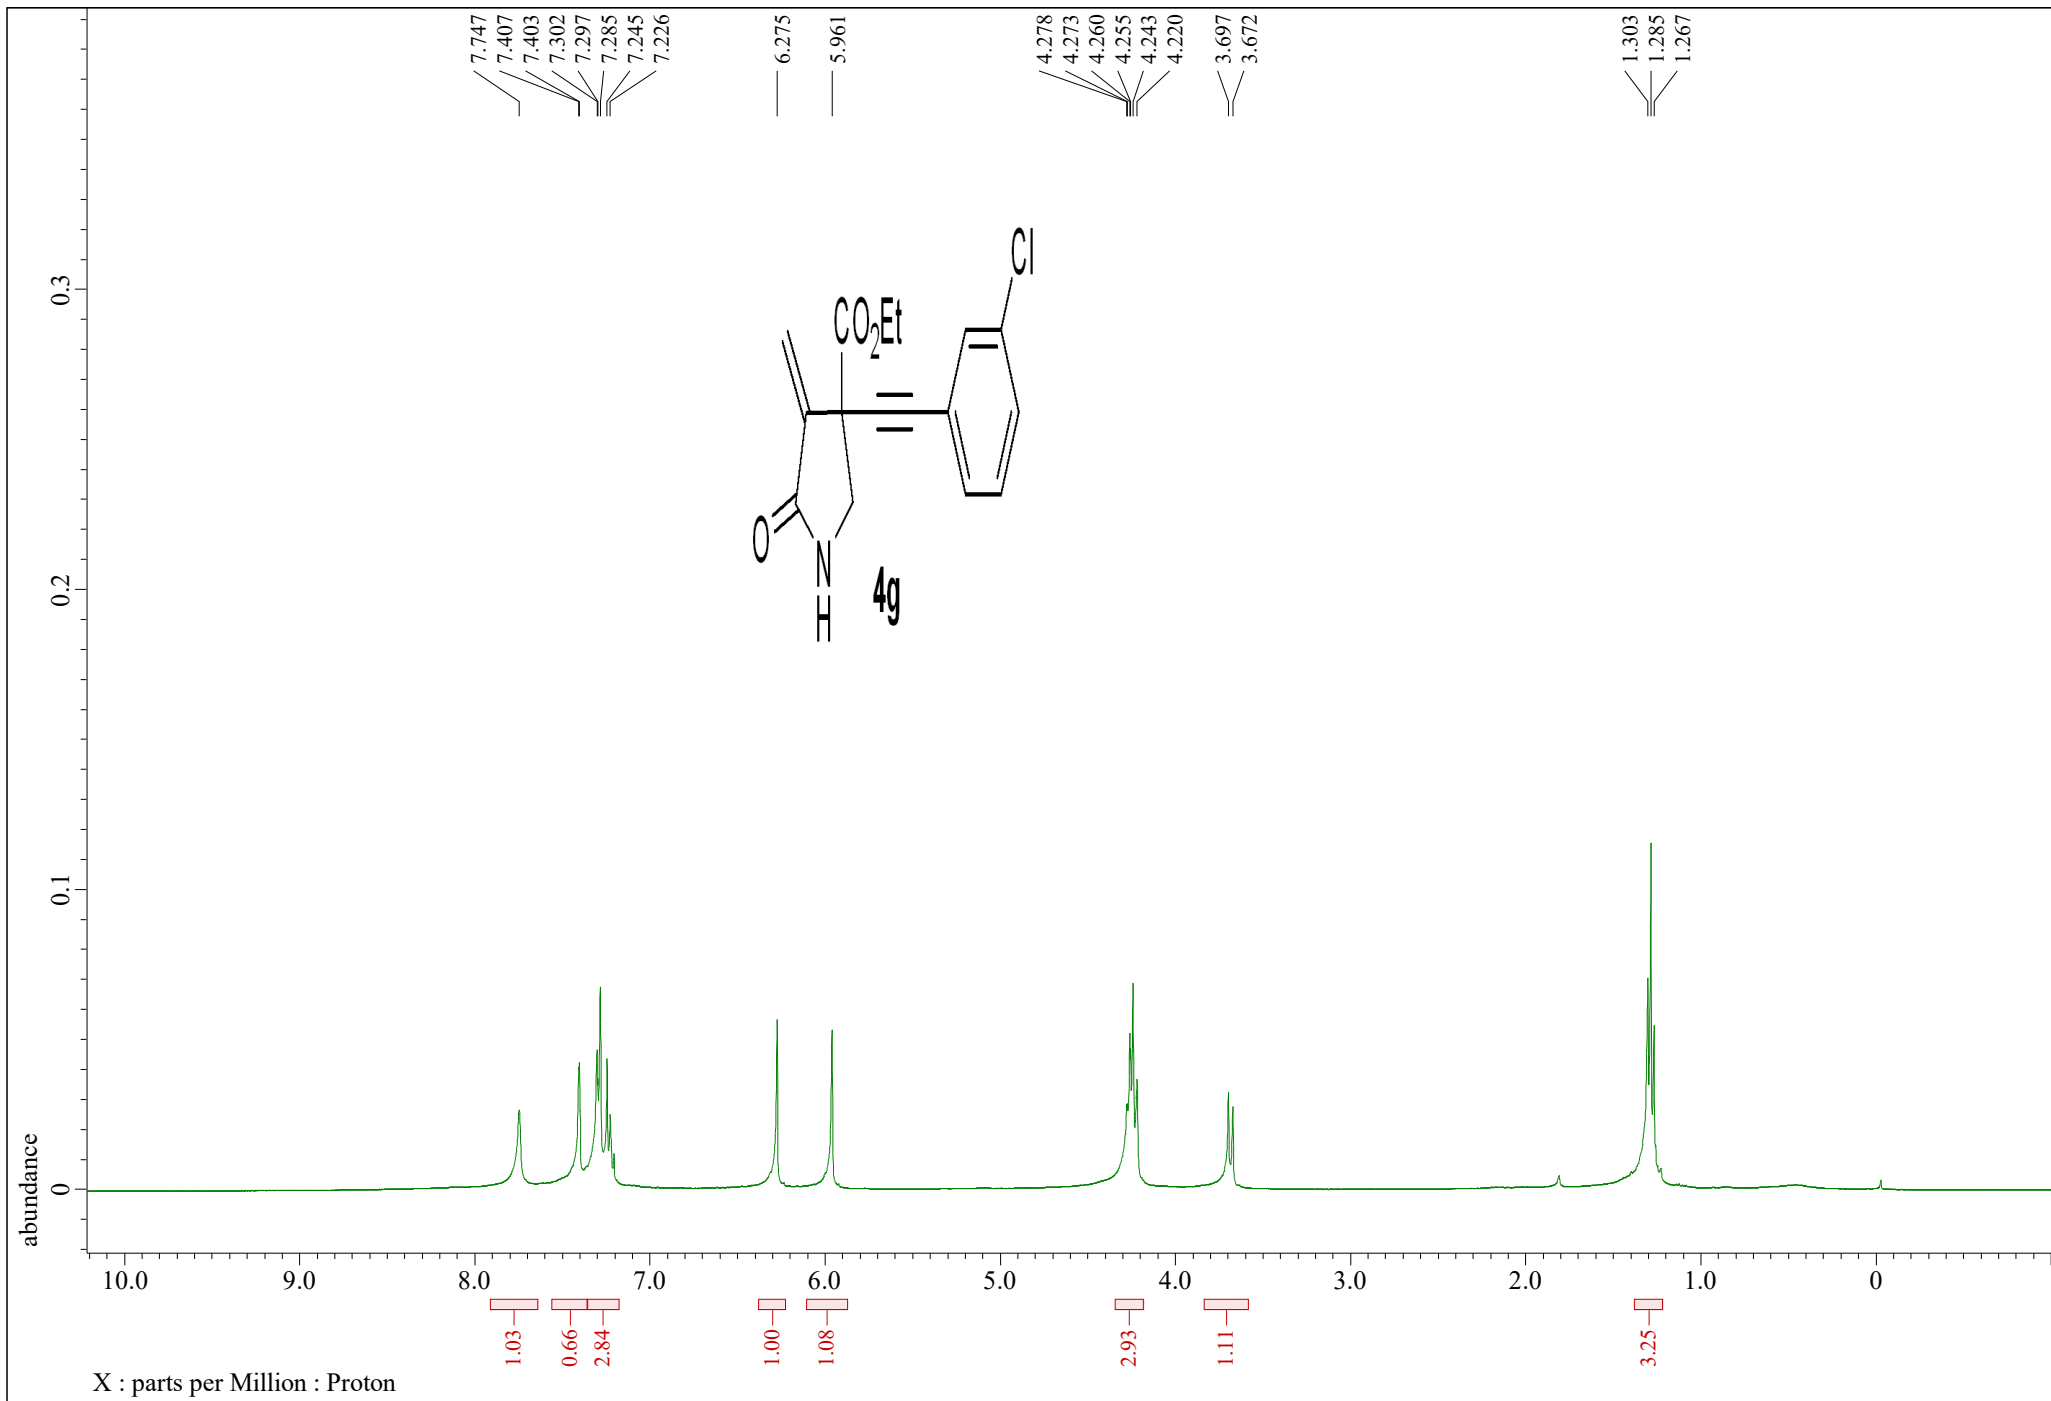

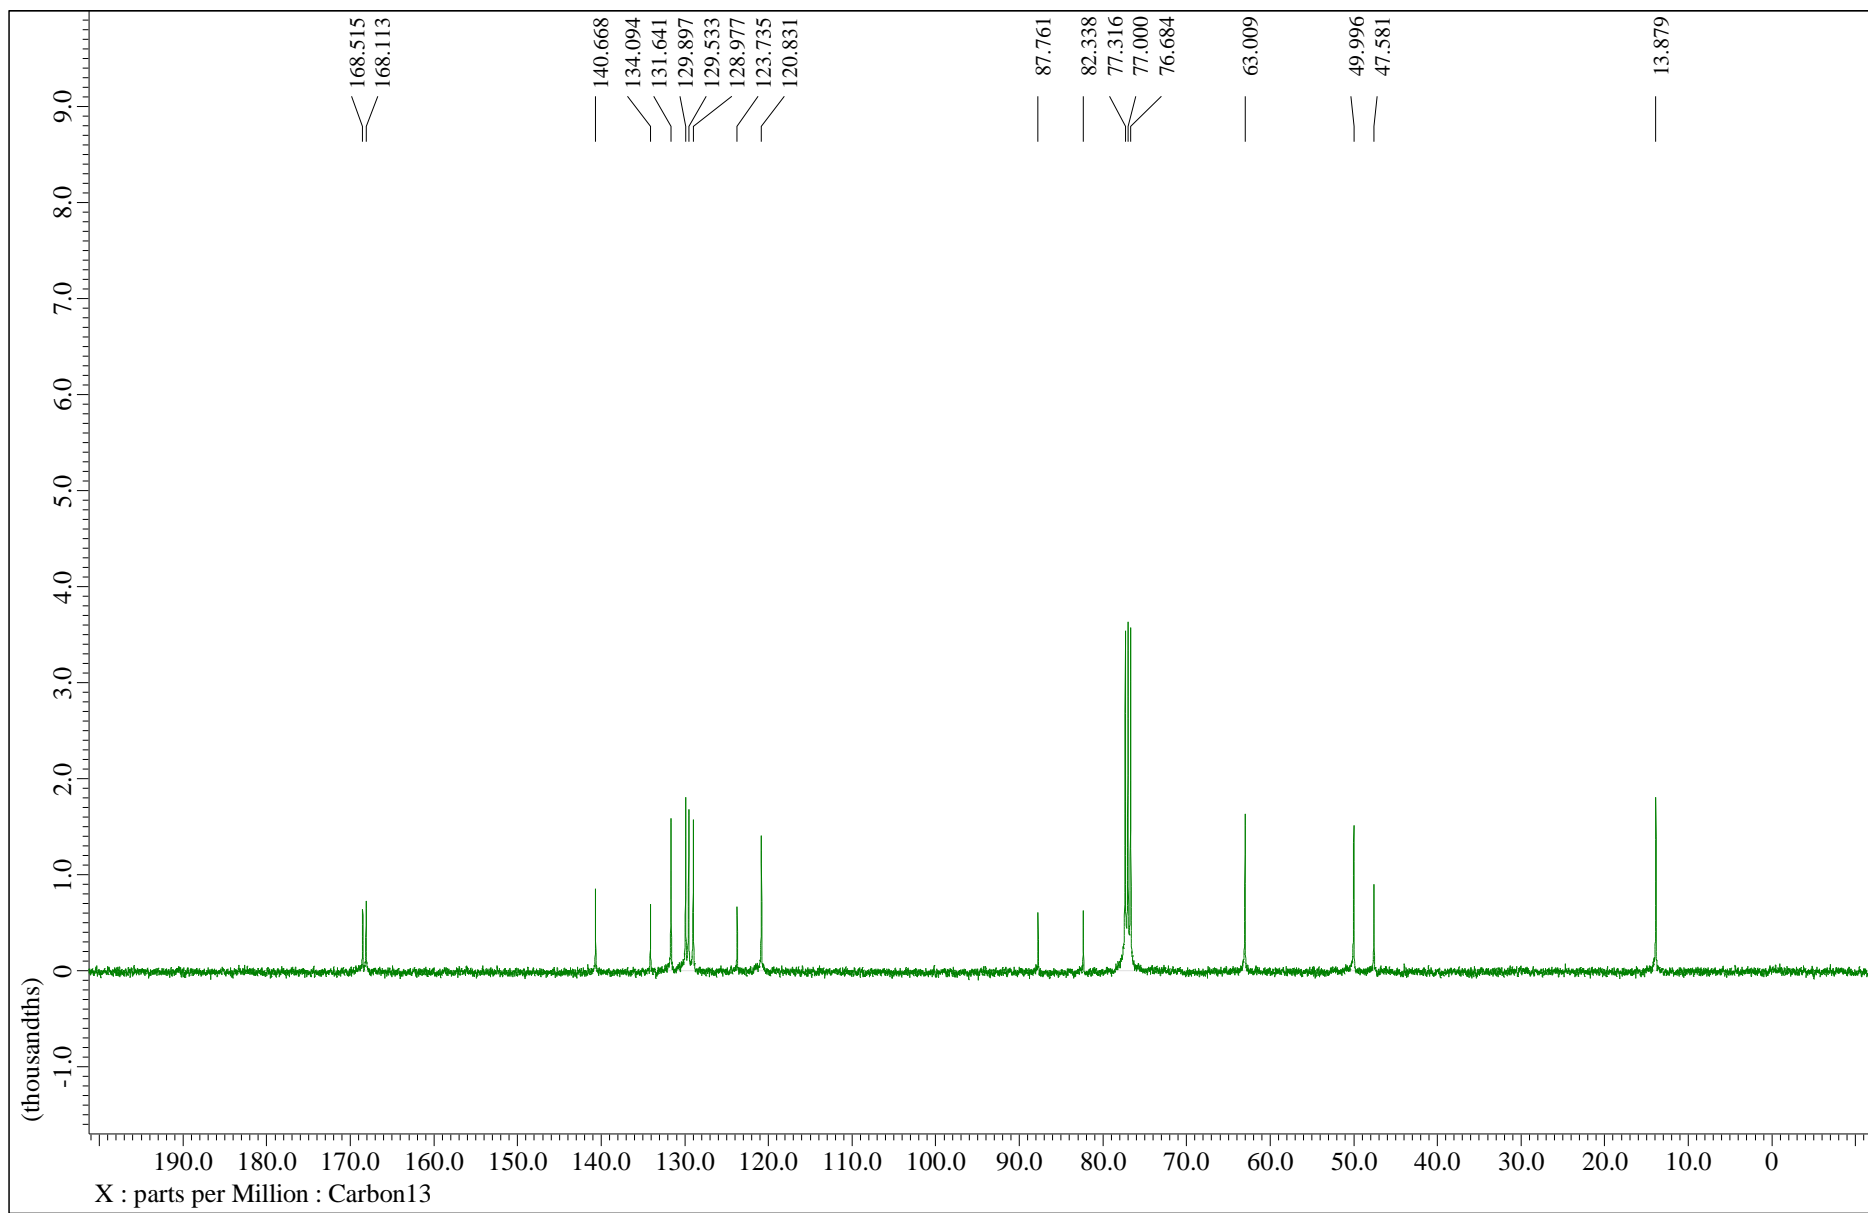



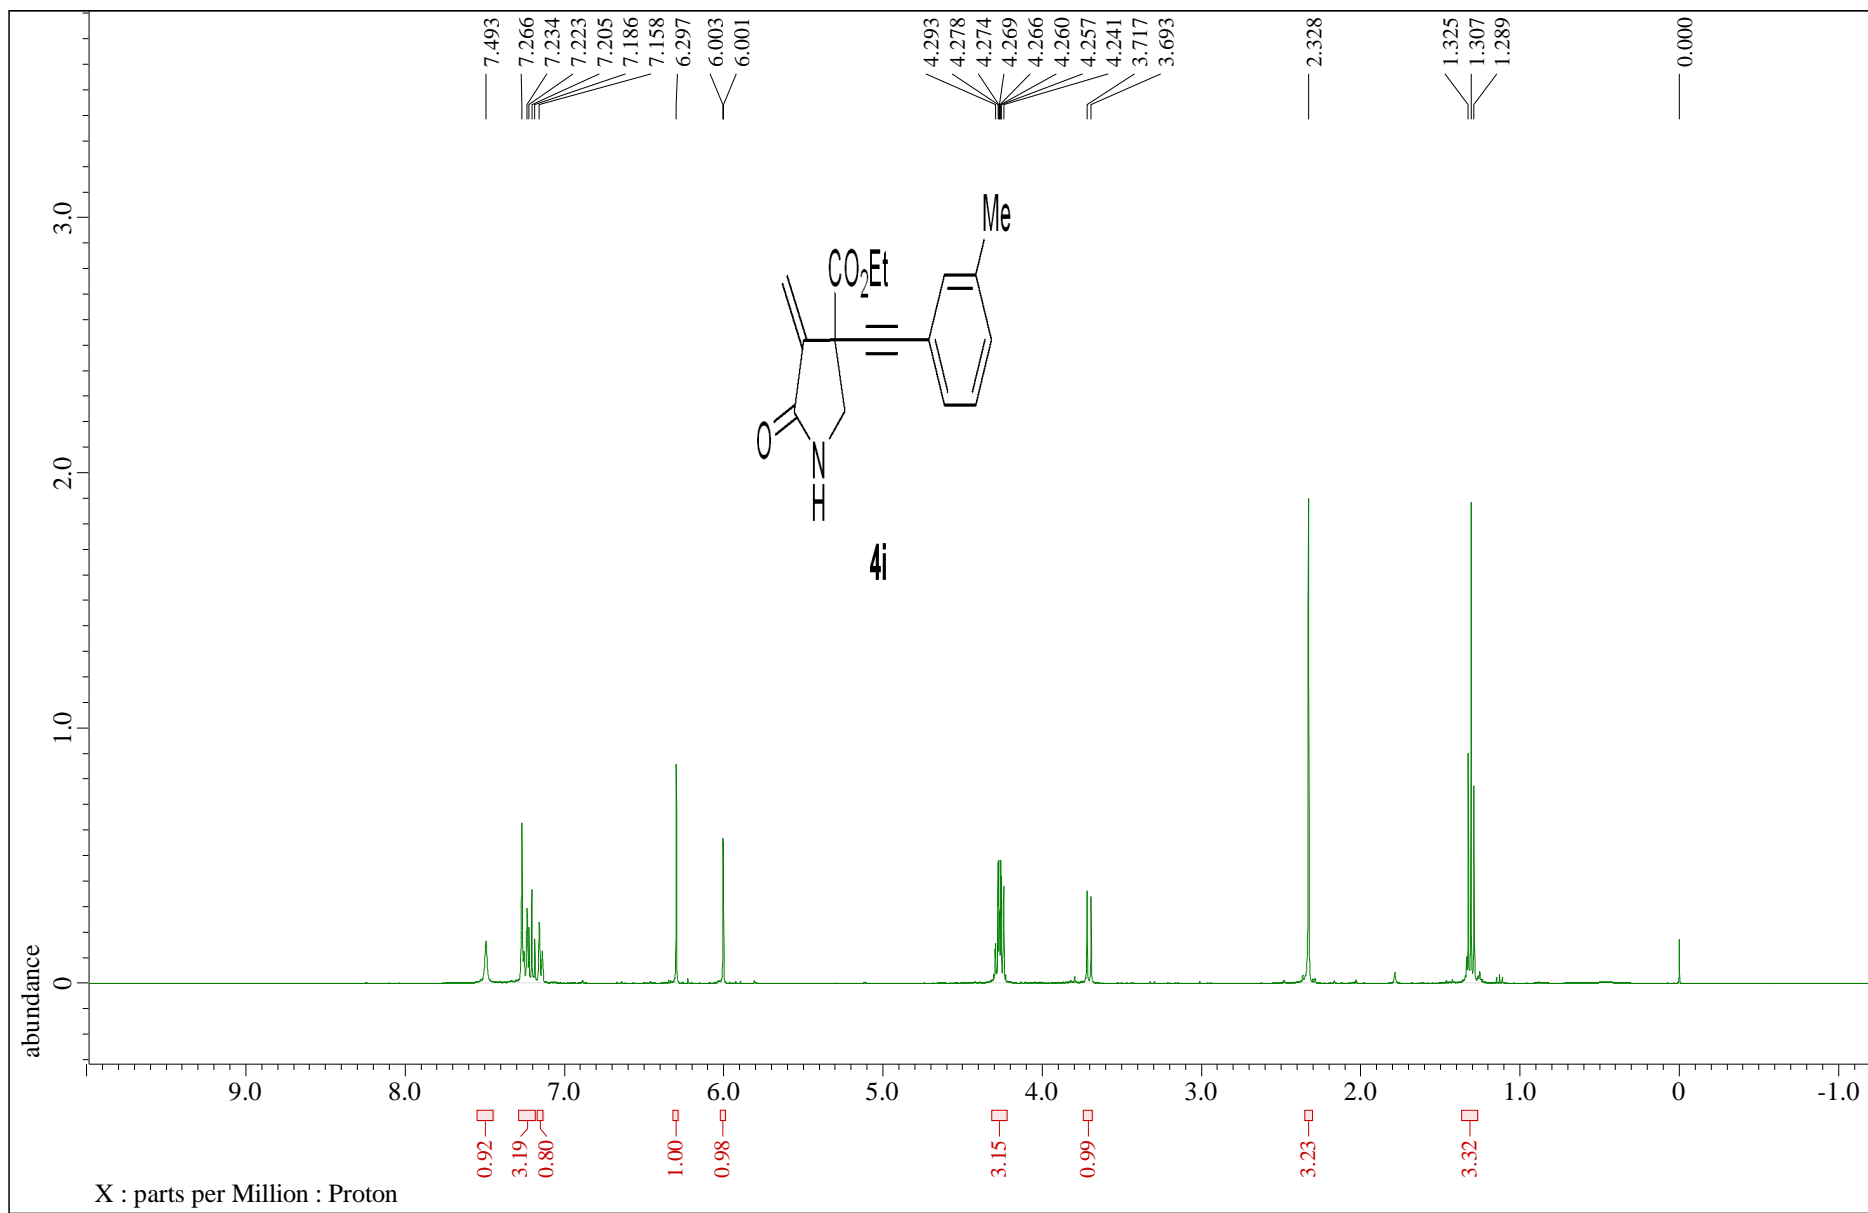

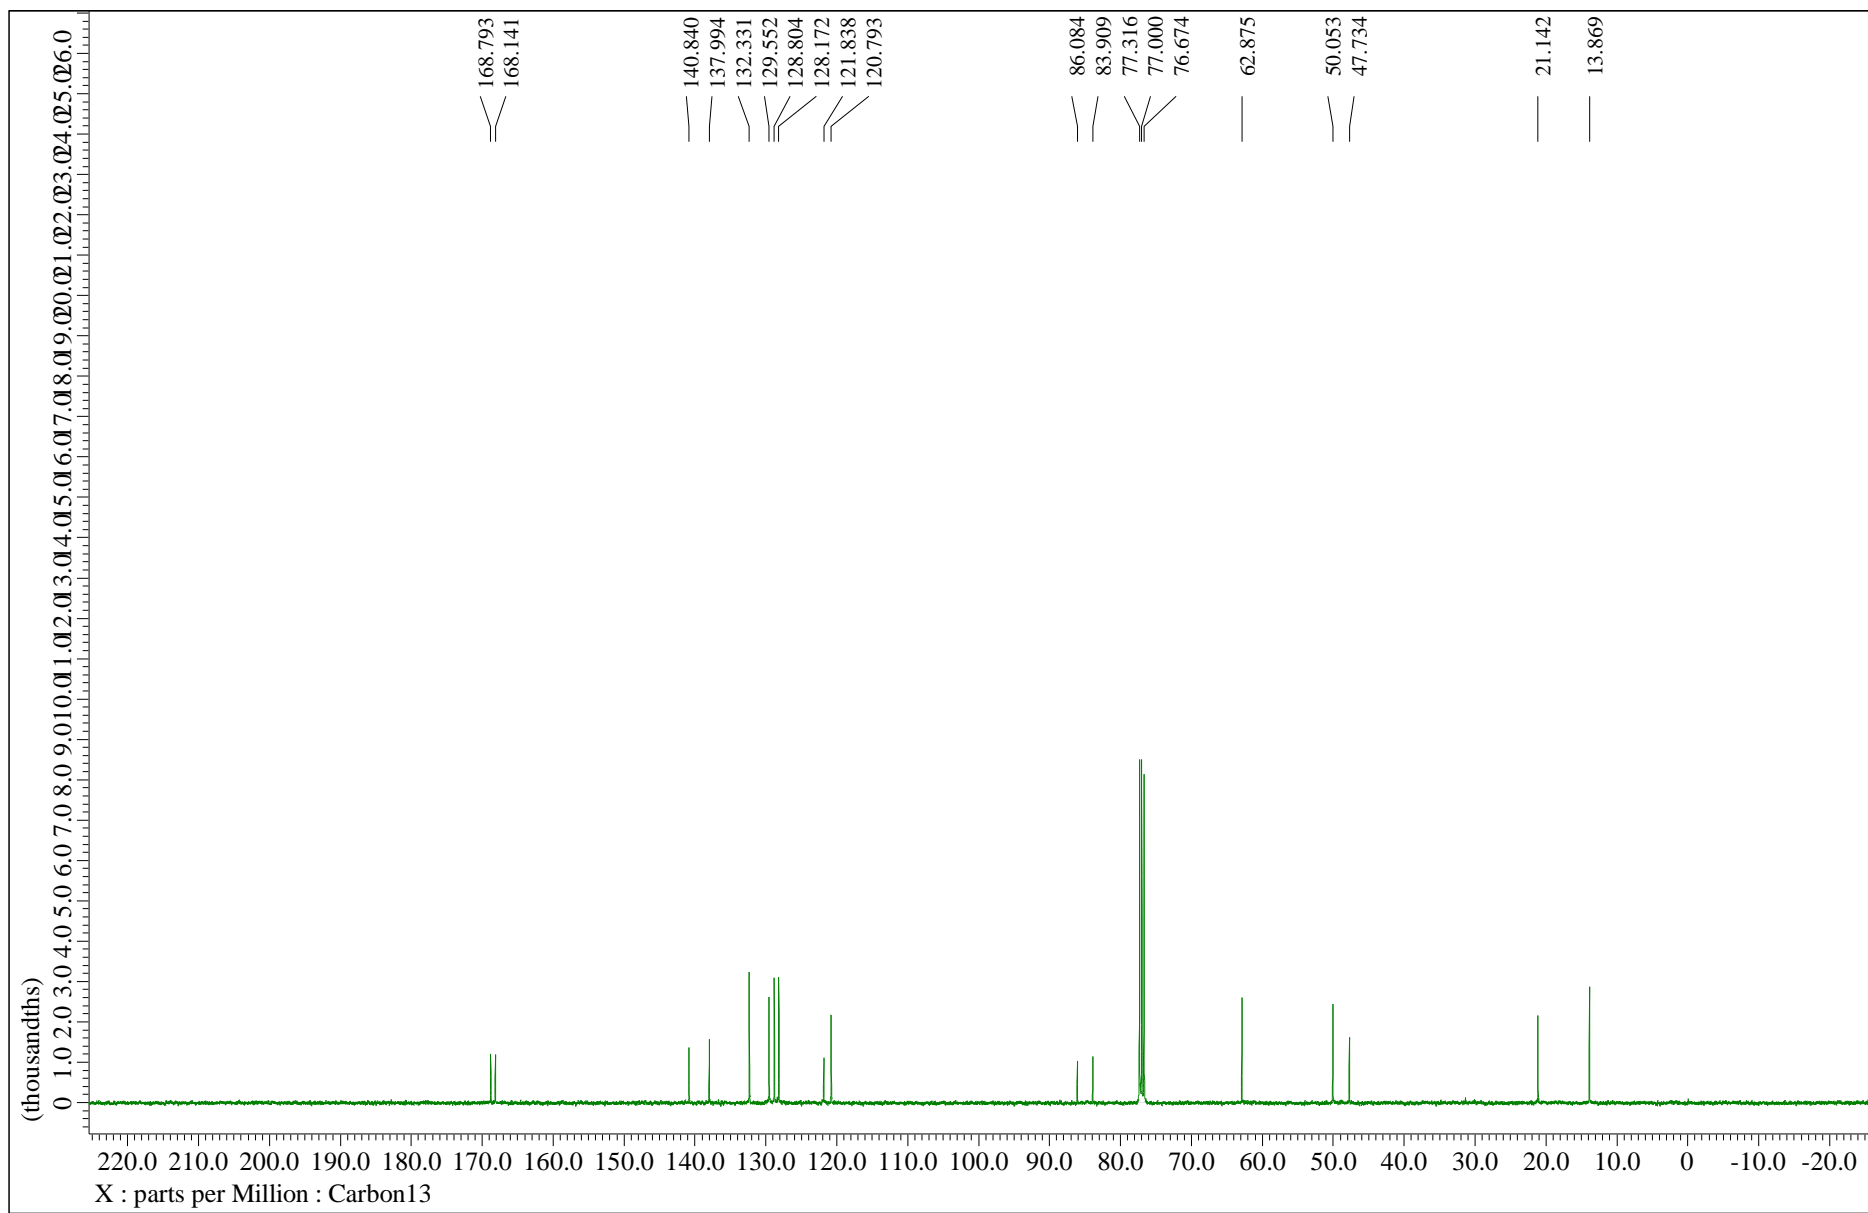

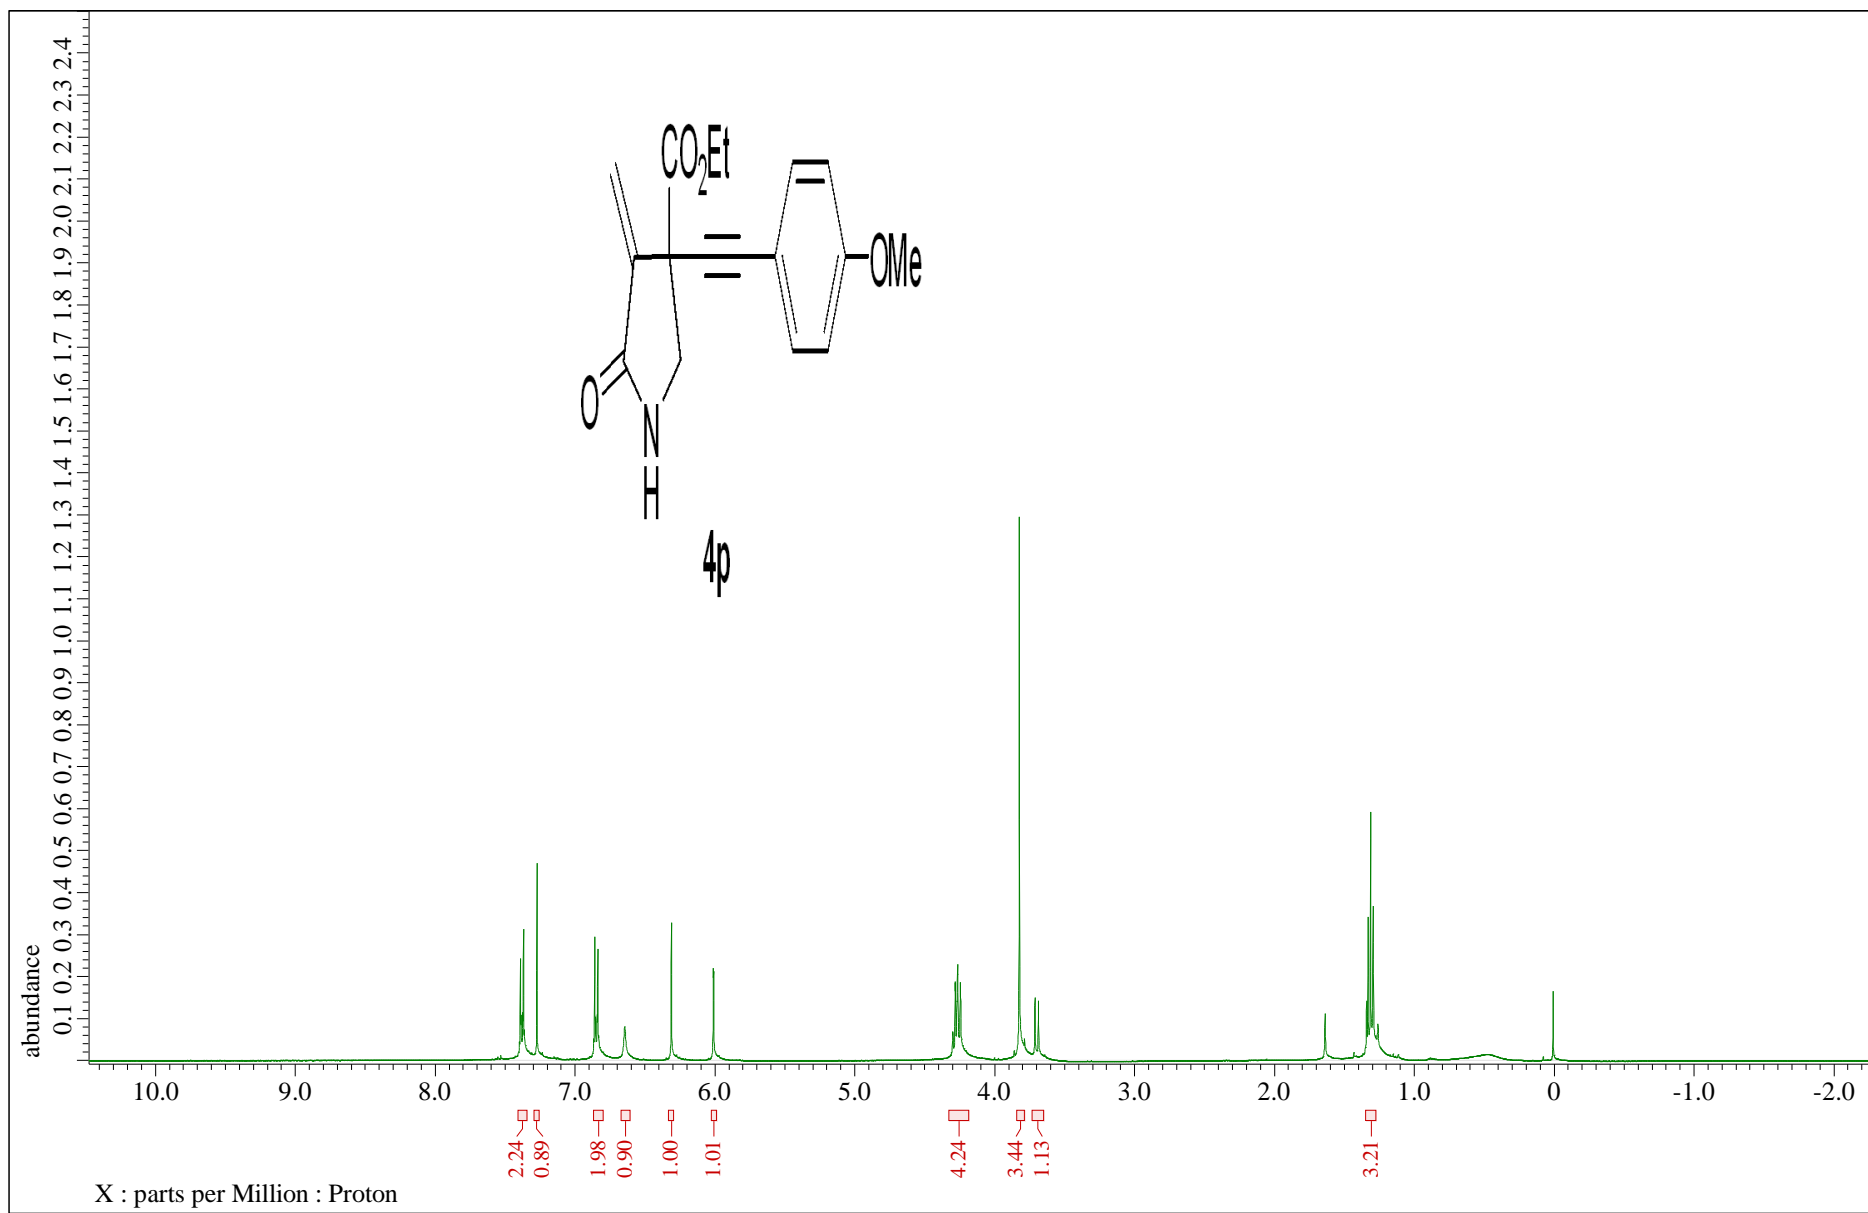

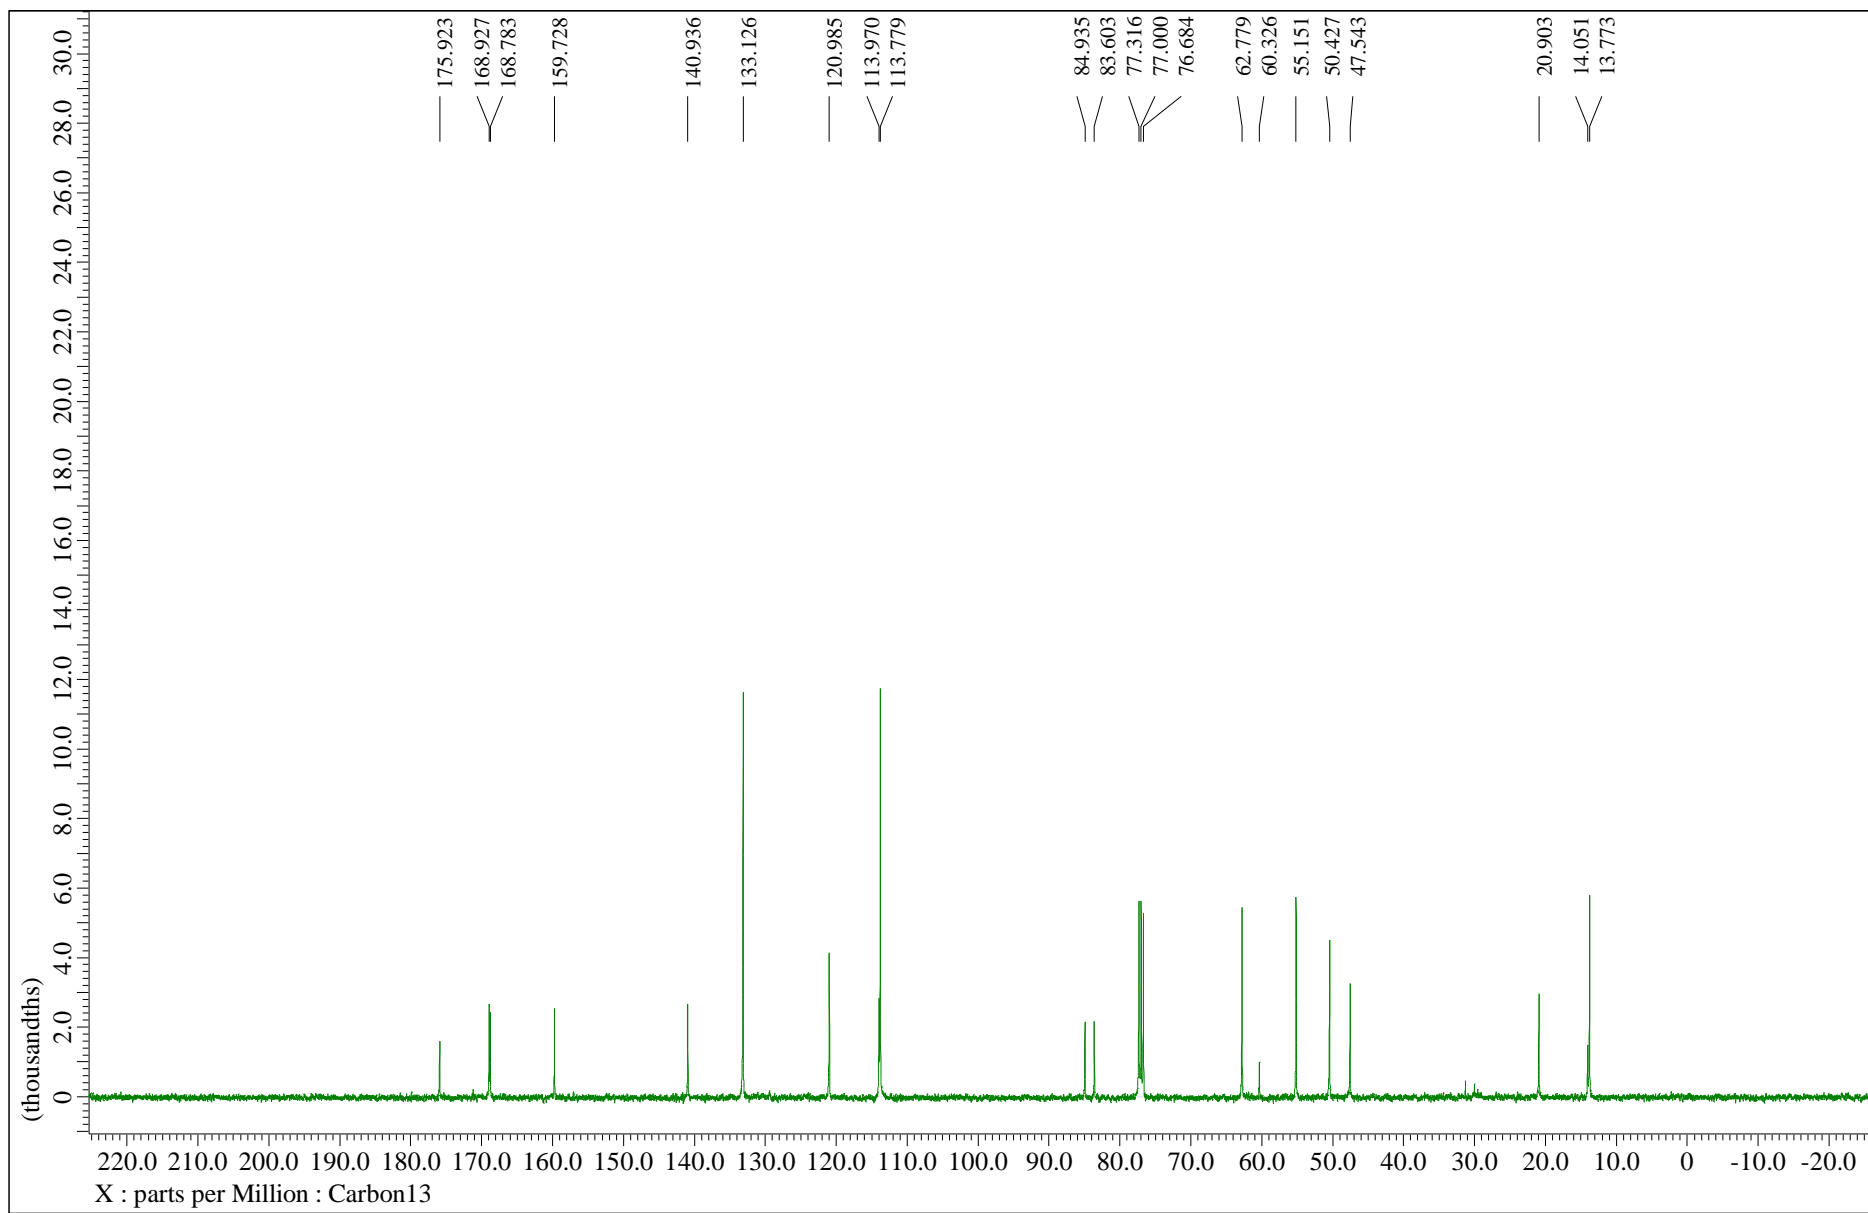

Supplement: d3ob01317k1.pdf [file d3ob01317k1.pdf]
